# Non-Canonical Odor Coding in the Mosquito

Meg A. Younger<sup>1,2\*</sup>, Margaret Herre<sup>1,2\*</sup>, Olivia V. Goldman<sup>1,2</sup>, Tzu-Chiao Lu<sup>3</sup>,  
Gabriela Caballero-Vidal<sup>4</sup>, Yanyan Qi<sup>3</sup>, Zachary N. Gilbert<sup>1</sup>, Zhongyan Gong<sup>1</sup>,  
Takeshi Morita<sup>1,5</sup>, Saher Rahiel<sup>1</sup>, Majid Ghaninia<sup>4</sup>, Rickard Ignell<sup>4</sup>, Benjamin J.  
Matthews<sup>1,5</sup>, Hongjie Li<sup>3</sup>, Leslie B. Vosshall<sup>1,2,5</sup>

<sup>1</sup>Laboratory of Neurogenetics and Behavior, The Rockefeller University, New York, NY 10065 USA

<sup>2</sup>Kavli Neural Systems Institute, New York, NY 10065 USA

<sup>3</sup>Huffington Center on Aging and Department of Molecular and Human Genetics, Baylor College of Medicine, Houston, TX 77030 USA

<sup>4</sup>Disease Vector Group, Unit of Chemical Ecology, Department of Plant Protection Biology, Swedish University of Agricultural Sciences, Alnarp, 234 22, Sweden

<sup>5</sup>Howard Hughes Medical Institute, New York, NY 10065 USA

\*These authors contributed equally

Current address: Department of Biology, Boston University, Boston, MA 02215 (M.A.Y.), Helen Wills Neuroscience Institute, University of California, Berkeley, Berkeley, CA 94720 USA (Z.G.), University of British Columbia, Department of Zoology, Vancouver, BC V6S 0K3 Canada (B.J.M.)

Correspondence: [myounger@bu.edu](mailto:myounger@bu.edu) (M.A.Y.), [margo.herre@gmail.com](mailto:margo.herre@gmail.com) (M.H.), [leslie@rockefeller.edu](mailto:leslie@rockefeller.edu) (L.B.V.)

**Key words:** *Aedes aegypti*; mosquito; odor coding; olfaction; snRNA-seq

## SUMMARY

Female *Aedes aegypti* mosquitoes are a persistent human foe, transmitting arboviruses including dengue and yellow fever when they bite us to obtain a blood meal. Mosquitoes are intensely attracted to human-emitted body odor, heat, and carbon dioxide, which they detect using three different large multi-gene families encoding odor-gated ion channels. Genetic mutations that cause profound disruptions to the olfactory system have modest effects on human attraction, suggesting significant redundancy in odor coding. The canonical view is that olfactory sensory neurons each express a single chemosensory receptor that defines its ligand selectivity. Using immunostaining, RNA *in situ* hybridization, and single nucleus RNA sequencing, we discovered that *Aedes aegypti* uses an entirely different organizational principle, with many neurons co-expressing multiple chemosensory receptor genes. *In vivo* electrophysiology demonstrates that the broad ligand-sensitivity of mosquito olfactory neurons is due to this non-canonical co-expression. The redundancy afforded by an olfactory system in which many neurons co-express multiple receptors with different chemical sensitivity may greatly increase the robustness of the mosquito olfactory system and explain our longstanding inability to engineer new compounds that disrupt the detection of human body odor by mosquitoes.

43  
44  
45  
46  
47  
48  
49  
50  
51  
52  
53  
54  
55  
56  
57  
58  
59  
60  
61  
62  
63  
64  
65  
66  
67  
68  
69  
70  
71  
72  
73  
74  
75  
76  
77  
78  
79  
80  
81  
82  
83  
84  
85  
86  
87  
88  
89  
90

## INTRODUCTION

Increased global travel, a growing world population, and rising temperatures increase the emergence and transmission of novel disease-causing pathogens spread by “vector” organisms such as mosquitoes, ticks, sandflies, and fleas. Diseases spread by these arthropods collectively account for more than 700,000 deaths every year (WHO, 2020). Female *Aedes aegypti* mosquitoes spread arboviruses including dengue, Zika, yellow fever, and chikungunya. Only female mosquitoes bite, and they do so because they require a blood-meal for reproduction (Allan et al., 1987). *Aedes aegypti* prefer to bite human hosts, which contributes to their effectiveness as a disease vector (Brown et al., 2014; Gouck, 1972; McBride et al., 2014). To identify human hosts, mosquitoes rely heavily on chemosensory cues, including carbon dioxide (CO<sub>2</sub>) emitted from breath, and human body odor, which is a mixture of hundreds of different individual odorants including alcohols such as 1-octen-3-ol and volatile amines such as ammonia (Acree et al., 1968; Bernier et al., 2000; Cook et al., 2011; Davis, 1984; Gallagher et al., 2008; Geier et al., 1999; Kline, 1994; Smallegange et al., 2005; Smith et al., 1970). Insects detect such chemosensory cues using receptors encoded by three large multi-gene families, Odorant Receptors (ORs), Ionotropic Receptors (IRs), and Gustatory Receptors (GRs). All three gene families encode ionotropic ligand-gated ion channels, in contrast to the metabotropic seven transmembrane domain G protein-coupled odorant receptors utilized by vertebrates and *Caenorhabditis elegans* nematodes (Ihara et al., 2013). ORs are odorant-gated ion channels (Butterwick et al., 2018; Del Marmol et al., 2021; Sato et al., 2008; Wicher et al., 2008) that are formed by a heteromultimeric complex of the conserved co-receptor Orco and a ligand-selective OR (Benton et al., 2006; Larsson et al., 2004; Neuhaus et al., 2005; Sato et al., 2008). IRs are variant ionotropic glutamate receptors that are formed by one or more of three conserved co-receptors, Ir25a, Ir8a, and Ir76b, and ligand-selective subunits that determine the range of odorants detected by the receptor complex (Abuin et al., 2011; Benton et al., 2009; Silbering et al., 2011). Although GRs are primarily taste receptors (Clyne et al., 2000; Montell, 2009; Scott et al., 2001), some GRs detect temperature (Ni et al., 2016), and several GRs form a complex that detects carbon dioxide (CO<sub>2</sub>) in a variety of insects (Jones et al., 2007; Kwon et al., 2007). CO<sub>2</sub> is an important volatile human host cue that activates and attracts mosquitoes (Gillies, 1980). In *Aedes aegypti*, *Gustatory Receptor 3 (Gr3)* encodes an essential subunit of the CO<sub>2</sub> receptor, and *Gr3* mutant mosquitoes lose all sensitivity to CO<sub>2</sub> (McMeniman et al., 2014).

Because mosquitoes specialize on humans and require blood to reproduce, the drive to find humans is strong and innate. Indeed, even mosquitoes genetically engineered to eliminate genes critical for peripheral detection of host sensory cues can find and bite people. Animals lacking the Odorant receptor co-receptor (*Orco*), the obligate co-receptor required for the function of the entire family of ORs, show strong attraction to humans (DeGennaro et al., 2013). Deleting *Ir8a*, *Ir76b*, or *Ir25a* co-receptors reduces but does not eliminate attraction to humans (De Obaldia et al., 2022; Raji et al., 2019). Similarly, while mosquitoes lacking the obligate CO<sub>2</sub> receptor subunit *Gr3* do not respond to CO<sub>2</sub> and show impaired behavioral responses in laboratory assays, they are highly effective in finding humans in a more naturalistic semi-field setting (McMeniman et al., 2014). Although the exact odor profile of people varies considerably, *Aedes aegypti* are highly effective in finding humans to bite, despite widespread efforts by humans to mask our odor with chemical repellents (Tawatsin et al., 2006; Travis et al., 1949). We have yet to identify long-lasting interventions to prevent this deadly biting behavior, and it is not known how the mosquito olfactory system is seemingly infallible in its ability to detect humans.

91 The cloning of the first odorant receptors in 1991 (Buck and Axel, 1991) led to the subsequent  
92 discovery that each vertebrate olfactory sensory neuron expresses a single odorant receptor  
93 that specifies its functional properties. With few exceptions, the well-studied olfactory system of  
94 *Mus musculus* mice features olfactory sensory neurons that are thought to express a single  
95 olfactory receptor (Bashkirova and Lomvardas, 2019; Chess et al., 1994). The same  
96 organization was reported in *Drosophila melanogaster* flies (Clyne et al., 1999; Gao and  
97 Chess, 1999; Vosshall et al., 1999), although recent work challenges this model (McLaughlin  
98 et al., 2021; Task et al., 2021). In both species, decades of evidence has supported the model  
99 that neurons expressing a given receptor project axons to dedicated olfactory glomeruli in the  
100 first sensory processing center in the brain, the antennal lobe in insects (Couto et al., 2005;  
101 Fishilevich and Vosshall, 2005; Vosshall et al., 2000) and the olfactory bulb in vertebrates  
102 (Mombaerts et al., 1996; Ressler et al., 1994; Vassar et al., 1994). This “one-receptor-to-one-  
103 neuron-to-one-glomerulus” organization is believed to be a widespread motif in insect olfactory  
104 systems, and the convergence onto discrete glomeruli is hypothesized to permit the brain to  
105 utilize combinatorial coding and parse which subpopulation of olfactory neurons is activated by  
106 a given odorant (Bisch-Knaden et al., 2018; Semmelhack and Wang, 2009; Wang et al., 2003).

107  
108 Consistent with this “one-receptor-to-one-neuron-to-one-glomerulus” organization in insects,  
109 the number of expressed chemosensory receptors in the OR and IR gene families in many  
110 insects roughly correlates to the number of olfactory glomeruli. This holds true in the honey  
111 bee *Apis mellifera* (~180 receptors/~160 glomeruli) (Flanagan and Mercer, 1989; Robertson et  
112 al., 2010), the tobacco hornworm *Manduca sexta* (~60 receptors/~70 glomeruli) (Grosse-Wilde  
113 et al., 2011), and *Drosophila melanogaster* flies (~60 receptors/~55 glomeruli) (Benton et al.,  
114 2009; Laissue et al., 1999; Robertson et al., 2003). Based on these studies, it is widely thought  
115 that merely counting the number of antennal lobe glomeruli in a new species would be  
116 reasonably predictive of the number of chemosensory receptors found in its genome. In *Aedes*  
117 *aegypti*, however, there is a striking mismatch between the number of expressed  
118 chemosensory receptors and the number of antennal lobe glomeruli, with at least twice as  
119 many receptors as available glomeruli (Bohbot et al., 2007; Ignell et al., 2005; Matthews et al.,  
120 2018; Shankar and McMeniman, 2020; Zhao et al., 2020). This leads to the question of how  
121 the mosquito olfactory system is organized to accommodate so many receptors and whether  
122 this deviation from rules established in other species explains their exquisite ability to locate  
123 human hosts.

124  
125 In this study, we developed a CRISPR-Cas9-based genetic knock-in strategy in *Aedes aegypti*  
126 to generate genetically-modified mosquito strains that label molecularly distinct populations of  
127 olfactory sensory neurons. We used these strains to understand how the mosquito olfactory  
128 system is organized and discovered that OR- and IR-expressing olfactory sensory neurons  
129 frequently innervated the same antennal lobe glomeruli. To ask if this was a feature of  
130 individual olfactory neurons expressing multiple chemosensory receptors, we profiled receptor  
131 expression in peripheral sensory organs using RNA *in situ* hybridization and by  
132 immunostaining with antibodies that recognize endogenous OR and IR co-receptors. To  
133 complement these studies, we carried out single nucleus RNA sequencing to profile gene  
134 expression in the antennae and maxillary palps. Through these experiments, we found that the  
135 olfactory system of *Aedes aegypti* does not have the expected “one-receptor-to-one-neuron-to-  
136 one-glomerulus” organization seen in other organisms. We frequently observed co-expression  
137 of multiple chemosensory receptors from at least two of the three receptor gene superfamilies  
138 within individual olfactory sensory neurons. We also saw expression of multiple receptors from

139 a single family within the same olfactory sensory neuron. To test if multiple receptors function  
140 to detect different ligands within the same olfactory sensory neuron, we used *in vivo*  
141 electrophysiology to examine odorant responses in the maxillary palp. We discovered a class  
142 of neurons that expresses members of both the OR and IR gene family and that responds to  
143 odorants that activate either OR or IR pathways. When we mutated either the OR or IR  
144 pathway by deleting the major co-receptors, neurons retained responsiveness to the odorant  
145 sensed by the pathway that was still intact. Therefore, both ORs and IRs are required to detect  
146 different classes of odorants in the same sensory neuron. This sensory organization, in which  
147 multiple receptors responding to different chemosensory stimuli are co-expressed, suggests a  
148 redundancy in the code for human odor. We speculate that this unconventional organization  
149 underlies the robust, seemingly unbreakable properties of the *Aedes aegypti* olfactory system  
150 in detecting human odor and driving human host-seeking in this olfactory specialist.  
151

## 152 RESULTS

### 153 Mismatch in chemosensory receptor and olfactory glomerulus number suggests a novel 154 olfactory organization

155 In the mosquito, olfactory cues are sensed by olfactory sensory neurons in the antenna and  
156 the maxillary palp, whose axons project to the ipsilateral antennal lobe of the brain (Distler and  
157 Boeckh, 1997; Ignell et al., 2005) (Figure 1A-D, Figure S1A-C). The antennal lobe, the insect  
158 equivalent of the vertebrate olfactory bulb, is organized into discrete olfactory glomeruli in  
159 which axons from peripheral olfactory sensory neurons terminate and synapse with local  
160 interneurons and projection neurons that relay olfactory information to the higher brain  
161 (Stocker, 1994). Previous studies used morphological criteria to define 50 (Ignell et al., 2005),  
162 60 (Zhao et al., 2020), or 81 (Shankar and McMeniman, 2020) discrete olfactory glomeruli in  
163 the female *Aedes aegypti* antennal lobe. In this study, we define approximately 65 olfactory  
164 glomeruli ( $64.9 \pm 0.9$ , mean $\pm$ SEM), obtained by counting antennal lobe glomeruli in the left  
165 hemisphere of 12 female *Aedes aegypti* brains stained to reveal synaptic neuropil (Figure  
166 1B,I,K, Figure S2-5). The glomerulus count ranged from 60-72 glomeruli per antennal lobe,  
167 indicating a high level of variability in the organization of the antennal lobe. We generated 3-D  
168 reconstructions of complete antennal lobes and saw considerable variability in the size and  
169 shape of the glomeruli (Figure S1). We were able to consistently identify certain landmark  
170 glomeruli, most notably the three glomeruli that are innervated by the maxillary palp (Ignell et  
171 al., 2005; Shankar and McMeniman, 2020) (Figure S1D-K).

172  
173 The canonical “one-receptor-to-one-neuron-to-one glomerulus” organization posits that the  
174 number of chemosensory receptors should roughly match the number of glomeruli in the  
175 antennal lobe (Figure 1D). While there is not yet a clear consensus on the number of olfactory  
176 glomeruli in *Aedes aegypti*, it ranges from 50 to 81. How does this relate to the number of  
177 chemosensory receptors expressed? In the updated *Aedes aegypti* L5 genome (Matthews et  
178 al., 2018), there are 117 OR, 135 IR, and 72 GR genes for a total of 324 structural genes that  
179 could function in the olfactory system (Figure 1E). Reanalysis of previously published antennal  
180 and maxillary palp RNA-sequencing data (Matthews et al., 2016) using multiple expression  
181 thresholds demonstrates that even at the conservative threshold of 5 transcripts per million  
182 (TPM), the mosquito olfactory system expresses 102 chemosensory receptors, and adjusting  
183 the threshold to 2, 1, or 0.5 TPM increases the number of receptors plausibly expressed to  
184 134, 156, and 178, respectively (Figure 1F,G). Thus, there are many more chemosensory  
185 receptors expressed in the olfactory system than available antennal lobe glomeruli, suggesting  
186 that the organization of the *Aedes aegypti* olfactory system must differ from the canonical

187 scheme. We speculate that the mismatch can be resolved by expressing multiple receptors per  
188 neuron or having multiple molecularly distinct neurons co-converge on a single glomerulus or  
189 both (Figure 1H).

190

191 To begin to distinguish between these two organizational principles, we generated a collection  
192 of CRISPR-Cas9 gene-targeted strains that label subpopulations of olfactory neurons using  
193 the Q-system, a binary expression system similar to Gal4/UAS (Brand and Perrimon, 1993)  
194 that uses cell type-specific expression of the QF2 transcription factor to induce expression of  
195 an effector from the QF2 binding QUAS enhancer (Potter et al., 2010; Riabinina et al., 2015;  
196 Riabinina et al., 2016). We introduced an in-frame insertion that replaced the stop codon of  
197 each of the co-receptors *Orco*, *Ir25a*, *Ir8a*, and *Ir76b*, as well as the CO<sub>2</sub> receptor subunit *Gr3*  
198 with the transcription factor QF2 (Figure 1I, Figure S2-S6. See Data File 1 for a full description  
199 of all genotypes by figure) (Matthews et al., 2019; Potter et al., 2010; Riabinina et al., 2016).  
200 These gene-sparing knock-in strains were designed to cause minimal disruption to the locus to  
201 increase the likelihood that they would faithfully report expression of the endogenous gene. We  
202 crossed these QF2 driver lines individually to a QUAS-CD8:GFP reporter to label neuronal  
203 membranes and visualized axonal projection patterns in the antennal lobe.

204

205 *Orco*, *Ir25a*, *Ir8a*, and *Ir76b* co-receptor driver lines were expressed in olfactory sensory  
206 neurons with distinct projection patterns in the antennal lobe (Figure 1I-K). Unexpectedly,  
207 neurons that expressed *Ir25a* projected to almost all glomeruli in the antennal lobe ( $89.9 \pm$   
208  $1.4\%$ , mean $\pm$ SEM, n=3) (Figure 1I-K, Figure S3), and expression overlapped extensively with  
209 glomeruli labeled by *Orco* (Figure 1I-K, Figure S2, Figure S3). While these co-receptor driver  
210 lines labeled glomeruli in the same regions from brain to brain, the interindividual expression  
211 patterns were not identical, consistent with the variability in glomerular arrangement that we  
212 have observed. Neurons that detect CO<sub>2</sub> are located in the maxillary palp (Grant et al., 1995;  
213 Lu et al., 2007; Omer and Gillies, 1971) and we saw that *Gr3*-expressing neurons projected to  
214 a large glomerulus in the posterior antennal lobe, Glomerulus 1 (Figure 1I-K) which is also  
215 innervated by *Ir25a*-expressing neurons. We also noted the presence of a second small  
216 glomerulus that was often innervated by *Gr3*-expressing neurons in the antenna (Figure S6B).  
217 These initial findings point to the overlap of OR-, IR-, and GR-expressing neurons in the  
218 antennal lobe of *Aedes aegypti*, consistent with recent observations in *Drosophila*  
219 *melanogaster* (Task et al., 2021).

220

### 221 Co-expression of *Orco* and *Ir25a* in the mosquito olfactory system

222 The high degree of overlap between glomeruli labeled by *Orco*- and *Ir25a*-expressing olfactory  
223 sensory neurons suggests that there is either widespread *Orco* and *Ir25a* co-expression within  
224 individual sensory neurons or that *Orco* and *Ir25a* are expressed in different neurons whose  
225 axons co-converge onto individual antennal lobe glomeruli or both (Figure 1H). To determine if  
226 *Orco* and *Ir25a* are co-expressed, we adapted the Split-QF2 system (Riabinina et al., 2019) for  
227 use in the mosquito. This system “splits” the transcription factor QF2 into two components, the  
228 DNA binding domain (QF2-DBD) and the activation domain (QF2-AD) each tagged with a  
229 synthetic leucine zipper (Figure 2A,B). When both the QF2-DBD and QF2-AD are co-  
230 expressed in the same cell, the two domains associate via the leucine zipper, reconstitute a  
231 functional QF2 protein, initiate transcription at the QUAS enhancer, and drive expression of a  
232 reporter gene (Figure 2C).

233

234 Using the same stop-codon replacement approach that we used to generate the *QF2*-lines, we  
235 inserted the *QF2-AD* into the *Ir25a* locus to generate *IR25a-QF2-AD* and the *QF2-DBD* into  
236 the *Orco* locus to generate *Orco-QF2-DBD*. When either *IR25a-QF2-AD* or *Orco-QF2-DBD*  
237 was used to drive expression of *dTomato* (Shaner et al., 2004), we did not see fluorescence in  
238 the female antenna, maxillary palp, or the antennal lobe (Figure 2D-F, Figure S7). Therefore,  
239 neither *QF2-DBD* nor *QF2-AD* alone can activate expression from the *QUAS* enhancer.  
240 However, when *Orco-QF2-DBD* and *IR25a-QF2-AD* were crossed into the same animal, we  
241 saw expression of *dTomato* in antennal and maxillary palp neurons of female mosquitoes, as  
242 well as axonal projections in the antennal lobe (Figure 2D-F, Figure S7, Figure S8). Nearly half  
243 of the glomeruli in the antennal lobe were labelled with *dTomato* (Figure 2G-I, Figure S7,  
244 Figure S8). This points to widespread *Orco* and *Ir25a* co-expression within *Aedes aegypti*  
245 olfactory sensory neurons, although we note that these findings do not rule out the possibility  
246 that co-convergence may be present as well.

247  
248 We then examined the olfactory system of male mosquitoes (Figure 2J-U). We observed  
249 extensive expression of *dTomato* throughout the antenna and in axons that terminate in the  
250 antennal lobe when we drove expression with either the *Orco-QF2* or *IR25a-QF2* driver lines  
251 (Figure 2N,O,R,S). We again saw no expression of *dTomato* when driven by either the *IR25a-*  
252 *QF2-AD* or *Orco-QF2-DBD* control lines (Figure 2L,M,P,Q). However, when *Orco-QF2-DBD*  
253 and *IR25a-QF2-AD* were crossed into the same animal, we observed widespread *dTomato*  
254 expression in the male antenna and antennal lobe, indicating co-expression of *Ir25a* and *Orco*  
255 in male olfactory sensory neurons (Figure 2T-U). It is not currently possible to compare male  
256 and female glomerular position due to differences in antennal lobe volume and shape and lack  
257 of glomerulus-specific driver lines, however, the general expression pattern was similar  
258 between males and females, with innervation predominant in the anterior-medial antennal  
259 lobes (Figure 2F,G,U).

## 260 **Co-expression of *Orco* and *Ir25a* in the mosquito taste system**

261 Another source of olfactory information in *Aedes aegypti* may derive from olfactory neurons on  
262 the proboscis, the mouthpart of the mosquito that engages in taste and food ingestion.  
263 *Drosophila melanogaster* flies express IRs and GRs in the proboscis, but not ORs (Larsson et al.  
264 al., 2004). In contrast, *Orco* neurons are widespread in both the proboscises of *Anopheles*  
265 *gambiae* and *Aedes aegypti* mosquitoes, and RNA-sequencing data from *Aedes aegypti* has  
266 shown there are many ligand-selective ORs expressed in this taste tissue (Matthews et al.,  
267 2016; Riabinina et al., 2016). Cells in the proboscis have been shown to respond to volatile  
268 odorants in *Anopheles gambiae*. However, projections from these neurons in *Anopheles*  
269 *gambiae* and *Aedes aegypti* extend to the subesophageal zone, the taste processing center of  
270 the brain, and not to the antennal lobe (Ghaninia et al., 2007; Jové et al., 2020; Kwon et al.,  
271 2006; Riabinina et al., 2016). It remains unknown if the brain interprets these cues as olfactory  
272 or gustatory.

273 We used our *QF2* and *Split-QF2* reagents to reveal the expression of *Orco* and *Ir25a* in  
274 proboscis neurons and examined how these cells innervate the subesophageal zone. There  
275 was extensive expression of both *Orco* and *Ir25a* alone in the proboscis (Figure 3A) as well as  
276 co-expression of *Orco* and *Ir25a* as defined by *dTomato* expression in the *Split-QF2* animals  
277 (Figure 3C). *Ir25a*-expressing neurons send extensive projections to the subesophageal zone,  
278 with axons terminating in the anterior and posterior regions of the subesophageal zone. There  
279 is a small cluster of glomeruli in the central subesophageal zone that receives dense  
280 innervation as well (Figure 3B). *Orco*-expressing neurons do not project to the anterior region

281 and send sparse projections to the posterior subesophageal zone and subesophageal zone  
282 glomeruli (Figure 3B). Innervation by the neurons that co-express both *Orco* and *Ir25a* send  
283 projections only to the posterior-ventral subesophageal zone, with the densest innervation in  
284 the medial region and sparser lateral arborizations (Figure 3D).

285 Since *Ir25a* complexes mediate not only detection of volatile odorants but also gustatory cues,  
286 it is possible that sensory afferents in the *Aedes aegypti* proboscis are able to detect olfactory  
287 as well as gustatory information within the same neurons. Alternatively, IRs and ORs in these  
288 neurons may function as olfactory receptors that relay olfactory information to the taste center  
289 of the mosquito brain.

290

### 291 **Extensive co-expression of chemosensory co-receptors in the antenna**

292 The observation that nearly half of antennal lobe glomeruli receive projections from neurons  
293 co-expressing *Ir25a* and *Orco* suggested that there is extensive co-expression of IRs and ORs  
294 throughout the antenna. To determine if neurons co-express *Orco* and *Ir25a* protein we  
295 generated an antibody to *Ir25a* and conducted whole mount antennal immunostaining with this  
296 antibody and a previously characterized *Orco* antibody (Basrur et al., 2020) to label  
297 endogenous *Orco* and *Ir25a* proteins in wild-type mosquitoes (Figure 4A-D). We observed  
298 extensive co-expression of *Orco* and *Ir25a* (Figure 4A-D), confirming the co-expression of  
299 these distinct chemosensory genes seen using our QF2 and Split-QF2 driver lines. In addition  
300 to neurons that contain both *Orco* and *Ir25a* protein, we also observed neurons that express  
301 either *Orco* or *Ir25a* alone (Figure 4A-D), indicating that OR cells, IR cells, and mixed OR+IR  
302 cells exist. We validated the specificity of the *Orco* and *Ir25a* antibodies by performing whole-  
303 mount immunostaining on antennae from *Orco* and *Ir25a* mutants (Figure 4E-H). To confirm  
304 and extend these results, we performed RNA *in situ* hybridization on wild-type antennae with  
305 probes designed to target endogenous *Orco*, *Ir76b*, and *Ir25a* RNAs (Figure 4I-K). These  
306 experiments replicated patterns of co-expression observed in immunostained antennae (Figure  
307 4A-D), with almost half of the *Orco* cells co-expressing *Ir25a*, and vice versa. In contrast we  
308 saw that few *Orco* cells co-express *Ir76b* by RNA *in situ* hybridization. Both the RNA *in situ*  
309 hybridization and immunostaining data indicated that widespread co-expression is not an  
310 artifact of the QF2 and split-QF2 driver lines.

311 To gain additional resolution on the degree of overlap between *Orco* and the three major IR  
312 family co-receptors, we carried out whole-mount antennal immunostaining with an antibody to  
313 the endogenous *Orco* protein and to GFP expressed from each sensory neuron QF2 driver.  
314 We confirmed extensive co-expression of *Orco* and *Ir25a* (Figure 4L-N) and found that  
315 substantially fewer cells co-express either *Orco* and *Ir8a* or *Orco* and *Ir76b*, even after  
316 accounting for fewer total *Ir76b* and *Ir8a* cells (Figure 4L-N). We also note that in addition to  
317 widespread co-receptor co-expression, some mosquito olfactory neurons express just one co-  
318 receptor (Figure 4O), highlighting the complexity in the rules that govern receptor co-  
319 expression in *Aedes aegypti* antennal olfactory sensory neurons.

320

### 321 **Single nucleus RNA sequencing reveals that many antennal neurons co-express 322 multiple ligand-selective receptor subunits**

323 Functional ORs and IRs are composed of a complex of co-receptor and ligand-selective  
324 receptor subunits. Because there are hundreds of ligand-selective OR and IR genes, it was not  
325 feasible to examine combinatorial co-expression of the full complement of receptors by RNA *in*  
326 *situ* hybridization or immunostaining. Instead, we developed a method for single nucleus RNA  
327 sequencing (snRNA-seq) in mosquito antennae based on previously described nucleus

328 extraction protocols from *Drosophila melanogaster* antennae (Li et al., 2021; McLaughlin et al.,  
329 2021). We isolated antennae from female mosquitoes, extracted nuclei, performed droplet  
330 microfluidics to barcode reads from each cell, and performed droplet-based snRNA-seq using  
331 the 10x Genomics platform. For clarity of presentation, we use “cell” as the unit of analysis to  
332 refer to expression profiling of single nuclei. These experiments were carried out in two  
333 batches, Batch 1 at Rockefeller University and Batch 2 at Baylor College of Medicine (see  
334 Methods). We filtered for cells based on quality control parameters and combined data from  
335 two batches, to capture a total of 14,161 cells (Figure 5A, Figure S9A-G). Unsupervised  
336 clustering was used to categorize cells into broad subtypes, which revealed cells that express  
337 epithelial or glial markers (Figure 5B, Figure S9H). This analysis also yielded 19 neuron  
338 clusters based on expression of at least 3 of 4 neural markers (*CadN*, *brp*, *syt1*, and *elav*) in  
339 50% or more of the cells within that cluster (Figure S9I). A total of 6,645 cells were classified  
340 as neurons. We then used unsupervised clustering on this population of neurons and identified  
341 54 clusters of antennal neurons (Figure 5C).

342  
343 To examine the distribution of chemosensory receptors, we averaged expression among cells  
344 within an entire cluster and saw cases where multiple receptors were co-expressed (Figure  
345 5D, Figure S10A). Among mean expression levels in the cluster, highly-expressed  
346 chemosensory receptors generally belonged to only 1 cluster. Because highly-expressed  
347 ligand-selective receptors displayed a strong relationship to individual clusters, we  
348 hypothesized that more complex co-expression patterns could be obscured when looking at  
349 cluster-level expression patterns. For instance, if a lower-expressed receptor subunit was co-  
350 expressed with several different highly expressed receptor subunits, cells exhibiting these  
351 combinations might be distributed among several clusters and might not be apparent at this  
352 level of analysis. We therefore investigated co-expression within individual cells.

353  
354 We first looked at the most highly-expressed receptor subunit pairs in a chord plot and saw  
355 several co-expression patterns that were not apparent in the cluster-based analyses (Figure  
356 5E). By replotting the expression of individual cells within clusters using heatmaps, we  
357 observed many cases of cells co-clustering that expressed discrete combinations of  
358 chemosensory receptors. This indicates that clusters are not a faithful representation of all  
359 chemosensory receptor combinations with a given cell (Figure S10C). This prompted us to  
360 investigate other ways of categorizing cells besides clustering to look more broadly at receptor  
361 co-expression patterns.

362  
363 To analyze the co-expression partners of a given receptor, we filtered our population of  
364 neurons for cells that express a receptor gene above a normalized expression threshold of 0.5  
365  $\log(\text{UMI of gene} \times 10,000 / \text{total UMI of cell} + 1)$  (Figure S11A). We then visualized co-expression  
366 using heatmaps. Because receptor expression has a bearing on clustering, we performed  
367 unsupervised clustering on these cells as a sorting mechanism to group cells by similarity to  
368 visualize patterns on heatmaps. Again, cells often grouped into clusters with clearly identifiable  
369 receptor expression patterns, including some that contained multiple receptor subunits (Figure  
370 S11B). Simplified heatmaps of groups of cells with distinct receptor co-expression patterns are  
371 illustrated in Figure 5F-I and S11C-F. This analysis revealed extensive co-expression that  
372 points to a far greater variety of cell types than previously anticipated. For instance, *Or82*  
373 marks at least 6 different cell types, some that appear to be *Or82*-specific and others that  
374 express an additional one, two, four, or five different ligand-selective receptors. Several of  
375 these OR-expressing cell types include one or more ligand-selective IR gene. *Ir64a* marks at



376 least 6 different cell types that each expresses one or more ligand-selective OR genes (Figure  
377 5F-I, S11C-F). These results reveal extensive and unexpected chemosensory receptor co-  
378 expression in the mosquito antenna.

379

### 380 **Coordinated co-expression of chemosensory receptors in the maxillary palp**

381 We next examined receptor co-expression in the maxillary palp, a smaller and simpler olfactory  
382 organ than the antenna that detects important host cues including CO<sub>2</sub> and 1-octen-3-ol, as  
383 well as other host odorants (Grant et al., 1995; Lu et al., 2007; McMeniman et al., 2014; Omer  
384 and Gillies, 1971). Each female *Aedes aegypti* maxillary palp contains approximately 35  
385 capitata-peg sensilla that each house three chemosensory neurons (McIver, 1982). Based on  
386 prior work that examined the morphology and function of the maxillary palp, the neurons within  
387 each sensillum are termed the “A”, “B”, and “C” cells based on their size, from largest to  
388 smallest respectively (Figure 6A-C). The A cell responds to the important host cue CO<sub>2</sub> and  
389 houses the Gr3 CO<sub>2</sub> receptor. The B and C cells both express *Orco*. The B cell is believed to  
390 express *Or8*, which detects 1-octen-3-ol, while the C cell expresses *Or49*, which has a less  
391 well-defined odorant response profile (Figure 6A).

392

393 We hypothesized that these three cell types project to three glomeruli in the antennal lobe. To  
394 delineate the organization of maxillary palp projections in the brain, we used our QF2 and  
395 Split-QF2 driver lines to examine maxillary palp sensory innervation of antennal lobe glomeruli  
396 (Figure 6C-K). We discovered that Glomerulus 1, which is the largest glomerulus in the  
397 antennal lobe (Shankar and McMeniman, 2020), received input from *Gr3*-expressing sensory  
398 afferents. Glomerulus 1 was also innervated by *Ir25a*-expressing sensory neurons (Figure 6F-  
399 K). Glomerulus 2 and Glomerulus 3 received input from *Orco*-, *Ir25a*-, and *Ir76b*-expressing  
400 neurons (Figure 6F-K). Co-expression of *Orco* and *Ir25a* in neurons that project to these two  
401 glomeruli was confirmed using the Split-QF2 system. In *Orco-QF2-DBD*, *Ir25a-QF2-AD*  
402 animals, Glomerulus 2 and Glomerulus 3 were labeled, but Glomerulus 1 was not (Figure 6E).  
403 These findings suggest that the A, B, and C cells express multiple co-receptors, spanning IR-  
404 OR and IR-GR classes.

405

406 To form functional odorant-gated IR or OR complexes, olfactory sensory neurons must  
407 express both co-receptors and ligand-selective receptors (Abuin et al., 2011; Benton et al.,  
408 2009; Larsson et al., 2004; Neuhaus et al., 2005). To simultaneously monitor the extent of co-  
409 expression of both co-receptors and ligand-selective receptors in the A, B, and C cells, we  
410 carried out multiplexed whole mount RNA *in situ* hybridization (Choi et al., 2018) in the  
411 maxillary palp (Figure 6L-P, Figure S12). The maxillary palp expresses many fewer  
412 chemosensory receptor genes than the antenna, with 18 receptors detected at the 1 TPM  
413 threshold in the maxillary palp compared to 138 in the antenna at the same threshold (Figure  
414 1F,G), simplifying the task of selecting genes for expression analysis. We performed RNA *in*  
415 *situ* hybridization with probes for 10 of the 18 chemosensory co-receptors and ligand-selective  
416 receptors that were present in maxillary palp RNA-seq at a threshold of TPM>1. This technique  
417 visualized gene expression with sufficient sensitivity that even *Or71* and *Ir75g* (present at 1.93  
418 and 1.67 TPM, respectively) were readily detected (Figure S12O,P).

419

420 We found no overlap in expression of *Orco* and *Gr3* in the maxillary palp, but *Ir25a* was  
421 expressed in all *Orco* and all *Gr3* cells (Figure 6L), consistent with our observation that *Ir25a*-  
422 expressing neurons project to all three antennal lobe glomeruli. Previous work in *Anopheles*  
423 *gambiae* suggested that *Orco*-expressing neurons in the maxillary palp can be evenly divided

424 into two non-overlapping groups: an *Or8* population and an *Or49* population (Lu et al., 2007). It  
425 is widely thought that the same is true in *Aedes aegypti*. We show definitively that *Or8* and  
426 *Or49* are expressed in segregated populations of *Orco*-expressing neurons in *Aedes aegypti*  
427 (Figure 6M) and, when combined with the results of the previous experiment (Figure 6L), that  
428 these cells are also all *Ir25a*-positive. Additional RNA *in situ* hybridization experiments  
429 revealed that *Or8*- and *Or49*-expressing cells also often express *Ir76b*, with a bias towards  
430 expression in *Or8*-expressing cells (Figure 6N, Figure S12I-O, Data File 1). Taken together  
431 these data show that *Orco*-expressing olfactory sensory neurons co-express the co-receptor  
432 *Ir25a* and either of the ligand-selective subunits *Or49* or *Or8*, and often co-express the co-  
433 receptor *Ir76b* as well.

434  
435 When we analyzed IR ligand-selective subunit expression, we found that *Ir100a* and *Ir93a* are  
436 selectively expressed in a subset of *Or49*-expressing neurons (Figure 6O,P, Figure S12L,M),  
437 suggesting that these cells can form functional OR and IR complexes with their respective co-  
438 receptors in the same neuron and that co-expression of ORs and IRs may be transcriptionally  
439 coordinated. *Or71* and *Or49* were found to be co-expressed, further supporting the idea that  
440 multiple ligand-selective ORs can be expressed in an olfactory sensory neuron in *Aedes*  
441 *aegypti* (Figure S12O). We also discovered that the ligand-selective receptor *Ir75g* was  
442 expressed in some but not all *Gr3*-expressing cells, which also express *Ir25a* (Figure S12P).  
443 Therefore, it is plausible that *Gr3* neurons can functionally express both GRs and IRs.

#### 444 445 **Single nucleus RNA sequencing of maxillary palp reveals unanticipated neuronal** 446 **complexity**

447 As mentioned above, the current view in the field is that the *Aedes aegypti* maxillary palp has a  
448 simple organization in which all 35 capitata-peg sensilla are molecularly and functionally  
449 identical, each containing the same A, B, and C cells (Figure 6A). Our RNA *in situ* hybridization  
450 results called this model into question. To examine receptor co-expression in the maxillary palp  
451 in greater detail, we carried out snRNA-seq using similar tissue collection and analysis  
452 pipelines used for the antenna (Figure 7A, Figure S13, Figure S14A-C), yielding data from  
453 2,298 cells. Using unsupervised clustering, we categorized these cells into epithelia, muscle,  
454 glia, and neurons (Figure 7B-C, Figure S13F). The neuron cluster comprised 630 cells that  
455 were further subdivided into four classes that showed remarkable correspondence to cell types  
456 previously described in the maxillary palp (Figure 7C-D, Figure S13G-H). Cluster 4 consists of  
457 putative mechanosensory neurons marked by expression of *nompC* and *hamlet*. Clusters 1, 2,  
458 and 3 were enriched for *Gr3*, *Or8*, or *Or49*, and likely correspond to A, B, and C cells,  
459 respectively (Figure 7D,F,J,K, Figure S14D-G).

460  
461 To investigate co-expression patterns of receptor genes within these clusters, we generated  
462 chord plots and found that *Or49* was co-expressed with *Ir93a* (Figure 7E), confirming our RNA  
463 *in situ* hybridization results. Two ligand-selective IR subunits, *Ir41a* and *Ir161*, were co-  
464 expressed in both the B cell and C cell. We used feature plots to further visualize the  
465 expression of individual receptor subunits within the clusters of maxillary palp neurons. A  
466 number of ligand-selective receptor genes were present in discrete clusters (Figure 7F-P,  
467 Figure S14H). Confirming our RNA *in situ* hybridization findings, both the *Gr3* cluster and *Orco*  
468 clusters also expressed the *Ir25a* co-receptor, and many *Ir76b*-expressing neurons were found  
469 in both the B and C cell clusters (Figure 7F-I, Figure S14D-E).

470

471 Consistent with RNA *in situ* hybridization data, *Ir93a* and *Ir100a* were expressed in the C cell  
472 cluster (Figure 7L-M). *Ir161* was expressed in both B and C cells (Figure 7O-P), and *Or44*,  
473 *Ir41a*, and *Ir41o* were found in all three chemosensory clusters (Figure 7N, Figure S14H).  
474 We did detect low levels of *Orco* expression in the *Gr3* cluster (Figure 7G) in these snRNA-seq  
475 experiments, an observation at odds with results from the three other methods used in the  
476 paper and one that we do not currently understand but could be due to differences in the  
477 sensitivity of detection methods. We also observed significant variability in expression of  
478 ligand-selective and co-receptor subunits across cells (Figure 7F-P), consistent with RNA *in*  
479 *situ* hybridization data (Figure 6L-P). Exploration of the effect of expression level on *in vivo*  
480 receptor function in individual neurons will be an interesting direction of future study.

481  
482 A summary of maxillary palp chemosensory receptor gene expression based on all the data in  
483 this study is presented in Figure 7Q. This represents a significant departure from the current  
484 view of this sensory system (Figure 6A). Notably, these data suggest that many B and C cells  
485 have all the necessary ligand-selective and co-receptor subunits to form both functional OR  
486 and IR receptors.

### 487 **Receptor co-expression expands the functional responses of olfactory neurons**

488 We next asked whether this extensive chemosensory receptor co-expression would allow  
489 maxillary palp neurons to respond to odorants detected by both ORs and IRs. We used single  
490 sensillum recording to measure odorant responses of the olfactory sensory neurons housed in  
491 maxillary palp-associated capitata-peg sensilla. This method of *in vivo* extracellular  
492 electrophysiology enables the simultaneous recordings of A, B, and C cells in response to  
493 odorant stimuli in an intact preparation of the female mosquito. Spike sorting is used to  
494 discriminate activity of these three neurons based on the amplitude and waveform of their  
495 responses. The physical size of the cell positively correlates with the amplitude of the response  
496 (Zhang et al., 2019). The largest A cell responds to CO<sub>2</sub>, while the smaller B cell responds to  
497 the host odorant 1-octen-3-ol (Bohbot and Dickens, 2009; Cook et al., 2011; Grant et al., 1995;  
498 Majeed et al., 2017 ; Syed and Leal, 2007). The smallest C cell has no consistent  
499 characteristic ligands in *Aedes aegypti*. We therefore focused our analysis on stimulus-evoked  
500 activity of the A cell and B cell while the mosquito was exposed to CO<sub>2</sub> or odorants likely to  
501 stimulate either the OR or IR pathway (Figure 8A-E).  
502  
503

504 To determine which family of receptors – GRs, ORs, or IRs – detects a given ligand we  
505 recorded odorant responses in wild-type mosquitoes as well as mosquitoes with mutations in  
506 *Gr3*, *Orco*, or *Ir25a*. Because the *Gr3* and *Orco* receptor mutants were generated in a different  
507 wild-type strain (+/+<sup>ORL</sup>) than the *Ir25a* mutant (+/+<sup>LVP</sup>) (De Obaldia et al., 2022), all analyses  
508 were conducted in two different wild-type background strains. Both wild-type strains showed  
509 similar odorant responses in all recordings (Figure 8A-E).  
510

511 Consistent with previous findings (McMeniman et al., 2014), the A cell responded to CO<sub>2</sub> in a  
512 dose-dependent manner but the B cell did not. The A cell response to CO<sub>2</sub> was abolished in  
513 *Gr3* mutants (Figure 8A). CO<sub>2</sub>-sensing neurons in the maxillary palp respond to multiple  
514 odorants in *Aedes*, *Culex*, and *Anopheles* mosquitoes (Lu et al., 2007; Tauxe et al., 2013;  
515 Turner et al., 2011) and it has been proposed that *Gr3* is a broadly-tuned receptor that  
516 responds to many odorants. We examined the response to a recently identified CO<sub>2</sub>-neuron  
517 activator, acetone (Ghaninia et al., 2019), which like CO<sub>2</sub> also activated the A cell but not the B

518 cell (Figure 8B). The response to acetone was abolished in the *Gr3* mutant (Figure 8B), which  
519 suggests that the CO<sub>2</sub> receptor can interact with non-CO<sub>2</sub> ligands.

520

521 The host-emitted odorant 1-octen-3-ol has been shown to activate the B cell. Both *Aedes*  
522 *aegypti* and *Anopheles gambiae* Or8-Orco, which are expressed in the B cell, respond to 1-  
523 octen-3-ol when expressed in heterologous cells (Bohbot and Dickens, 2009; Lu et al., 2007).  
524 We found that firing of the B-cell, but not the A cell, increased in the presence of 1-octen-3-ol  
525 (Figure 8C). The B cell response to 1-octen-3-ol was abolished in the *Orco* mutant, but not in  
526 *Gr3* or *Ir25a* mutants (Figure 8C), consistent with the role of Or8-Orco in detecting this  
527 compound.

528

529 Volatile amines, including polyamines, have been proposed to be IR ligands in *Drosophila*  
530 *melanogaster* (Geier et al., 1999; Hussain et al., 2016; Min et al., 2013; Silbering et al., 2011).  
531 We therefore examined the response of maxillary palp neurons to two volatile amines, hexyl  
532 amine and triethyl amine. We found that both amines activated the B cell in wild type, *Gr3*  
533 mutants, and *Orco* mutants (Figure 8D-F). Average responses to hexyl amine and triethyl  
534 amine were strongly reduced but not abolished in the *Ir25a* mutant. When we scrutinized the  
535 raw data carefully, we noted that responses to both stimuli in *Ir25a* mutants fell into two clear  
536 types of neurons. The majority of *Ir25a* mutant neurons did not respond to these stimuli at all,  
537 but a few responded even more robustly than wild type (Data File 1).

538

539 To determine if there are two different functional types of B neurons, we generated a second  
540 independent dataset using these stimuli to examine responses in an additional 17 wild-type  
541 (+/+<sup>LVP</sup>) neurons and 23 additional *Ir25a* mutant neurons. The response to the water control  
542 stimulus never exceeded 30 spikes/sec firing frequency in either genotype, and we used this  
543 as a threshold to classify neurons as “responders” or “non-responders” (Figure 8H-I). We  
544 found that all +/+<sup>LVP</sup> neurons responded to triethyl amine, and 16 out of 17 +/+<sup>LVP</sup> neurons  
545 responded to hexyl amine (Figure 8H-I). Responses to both stimuli were significantly higher  
546 than the water control in wild-type (+/+<sup>LVP</sup>) neurons. In contrast, most neurons in the *Ir25a*  
547 mutant did not respond to either triethyl amine or hexyl amine (78.3% n = 23) and neither  
548 stimulus elicited significantly different responses from the water control when taking the entire  
549 population of 23 recorded neurons into account.

550

551 We noted that 5 out of 23 neurons (21.7%) showed strong responses to both amines that  
552 exceeded the corresponding response in +/+<sup>LVP</sup> neurons (Figure 8G-I). These neurons were  
553 considered outliers by a ROUT analysis (Q=1%), consistent with the classification system that  
554 we used to categorize neurons as responders or non-responders. Given our discovery of  
555 multiple additional IRs and ORs co-expressed along with *Or8* in the B cells (Figure 7Q), we  
556 speculate that there are at least two distinct types of B neurons, one that requires *Ir25a* to  
557 respond to amines and the other that does not. We hypothesize that this second type of B  
558 neuron expresses the *Ir76b* co-receptor, which could form functional amine receptors with one  
559 or more of the ligand-selective IRs expressed in the B cell. Our findings that the B cell  
560 responds to 1-octen-3-ol in an *Orco*-dependent manner and to triethyl amine and hexyl amine  
561 in an *Ir25a*-dependent manner is consistent with the hypothesis that ORs and IRs are  
562 functionally co-expressed in the same neurons and that co-expression enables these cells to  
563 respond to ligands that activate both classes of receptors.

## DISCUSSION

564  
565  
566  
567  
568  
569  
570  
571  
572  
573  
574  
575  
576  
577  
578  
579  
580  
581  
582  
583  
584  
585  
586  
587  
588  
589  
590  
591  
592  
593  
594  
595  
596  
597  
598  
599  
600  
601  
602  
603  
604  
605  
606  
607  
608  
609  
610  
611

### **Combinatorial chemosensory receptor co-expression in *Aedes aegypti***

The mismatch between the number of receptors in the *Aedes aegypti* genome and the number of glomeruli in the antennal lobe is resolved in part by co-expression of multiple odorant receptors in individual olfactory sensory neurons. We found that co-expression is extremely widespread, both between and within OR and IR receptor families, and that the number of receptors expressed in a neuron can vary substantially. While some neurons express only an individual co-receptor and ligand-selective receptor pair, others express “sets” of frequently co-expressed receptor subunits. We were surprised to find that a single receptor subunit could be co-expressed with completely different combinations of receptor subunits. The biological significance of this finding remains to be seen and the exact number of receptor groupings will require extensive additional study.

We found that many commonly co-expressed IRs and ORs belong to mosquito gene family expansions. The *Ir41* clade of IRs was among the most common IRs to be co-expressed with ORs. This clade is greatly expanded in *Aedes aegypti* relative to *Drosophila melanogaster*, with 16 members compared to only 3 orthologous genes, respectively (Matthews et al., 2018). The *Drosophila melanogaster* orthologues, *Ir41a*, *Ir76a*, and *Ir92a*, have all been shown to compose channels that respond to amines (Hussain et al., 2016; Min et al., 2013; Silbering et al., 2011). Volatile amines are enriched in human odor and are known to play an important role in the detection of humans by mosquitoes (Bernier et al., 2000; de Lacy Costello et al., 2014; De Obaldia et al., 2022). It is tempting to speculate that the expansion of the *Ir41* clade in *Aedes aegypti* enhances the ability of these mosquitoes to detect amines present in human odor, although this remains to be tested. Similarly, many of the commonly co-expressed ORs are also members of gene expansions in *Aedes aegypti* as well as *Anopheles gambiae* but have no direct orthologues in *Drosophila melanogaster* (Matthews et al., 2018). Because these mosquito olfactory specialists maintain a very different diet than *Drosophila melanogaster*, it will be fascinating to examine if the ligands for these receptors are enriched in human body odor.

Among the OR subunits found to be co-expressed with other ORs, *Or4* was notable. Subspecies of *Aedes aegypti*, *Aedes aegypti aegypti* and *Aedes aegypti formosus*, have evolved different host preferences, either for humans or non-human mammals respectively. *Or4* responds to the host odorant sulcatone and variation in its coding sequence corresponds strongly with human host preference (McBride et al., 2014; Rose et al., 2020). We observed co-expression of *Or4* in at least three molecularly distinct groups of sensory neurons that each contain 3, 4, or 5 non-overlapping ligand-selective OR subunits in addition to *Or4*. The ligand response profiles of these receptors, which all belong to the families of ORs that are expanded in *Aedes aegypti*, are unknown but we hypothesize that they respond to additional human host odorants. Our experiments used strains of mosquitoes that belong to the *Aedes aegypti aegypti* subspecies and show a preference for human over non-human animal odor (McBride et al., 2014; Rose et al., 2020). It will be interesting to see if co-expression of these OR subunits with *Or4* is altered in *Aedes aegypti formosus*, which prefer non-human animals.

### **The possibility of neuronal co-convergence in antennal lobe glomeruli**

The mismatch between the number of chemosensory receptors in the genome and the number of glomeruli in the antennal lobe originally pointed to two simple models: co-expression or co-convergence. In this study we presented extensive evidence for widespread co-expression in

612 the *Aedes aegypti* olfactory system. However, our findings also point to the likelihood that co-  
613 convergence exists in this olfactory system as well. Previous work in *Drosophila melanogaster*  
614 and *Mus musculus* has shown that the identity of an olfactory neuron is defined by the  
615 chemosensory receptor it expresses. However, our snRNA-seq results identify a wide variety  
616 of cell types that cannot be defined by expression of a single chemosensory receptor in a  
617 given neuron. Rather *Aedes aegypti* chemosensory cell types are defined by the entire  
618 complement of odorant receptors they express. For example, we identified 7 types of *Ir64a*  
619 neurons and 4 types of *Or4* neurons each co-expressed with many different types of ORs and  
620 IRs. Given this revised view of olfactory sensory neuron types, the number of cell types in the  
621 antenna far exceeds the number of glomeruli in the antennal lobe. The most likely solution to  
622 this problem is co-convergence of neurons in the antennal lobe, although this remains to be  
623 tested directly.

624  
625 What rules govern co-convergence in the mosquito? Do neurons that express the same  
626 dominant ligand-selective receptor subunit but also co-express different combinations of  
627 ligand-selective receptors project to the same glomerulus or separate glomeruli? These  
628 contrasting organizational principles would result in very different models of odor coding. We  
629 demonstrate that *Aedes aegypti* mosquitoes express many receptors in some neurons but only  
630 a single receptor in others. The presence of multiple receptors in a given neuron could serve  
631 as a mechanism to integrate odorant information in the primary sensory neuron itself rather  
632 than at the first synapse in the antennal lobe. Co-convergence of olfactory sensory neurons  
633 onto the antennal lobe could allow for the early integration of olfactory cues while still retaining  
634 discrete input channels that could be selectively modulated during changes in behavioral state,  
635 such as the suppression of host-seeking after a blood meal. Exploring the organization of this  
636 sensory system and the downstream circuitry will be essential, including the question how  
637 projection neurons encode olfactory information given such extreme diversity in sensory  
638 afferent types.

### 639 **Coordinated co-expression between *IR*, *OR*, and *GR* ligand-selective receptors**

640 We identified co-expression of co-receptors and ligand-selective receptors belonging to distinct  
641 chemosensory families in single neurons in both the antenna and the maxillary palp. This co-  
642 expression poses a gene regulatory problem for an olfactory neuron. For ORs and IRs to form  
643 functional chemosensory receptors, at least one co-receptor and one ligand-selective receptor  
644 must be expressed in a cell. We have demonstrated that multiple ORs and IRs are expressed  
645 in specific receptor “sets”. Thus, the transcriptional landscape in *Aedes aegypti* olfactory  
646 neurons is not only permissive to co-expression, but ensures certain receptors are expressed  
647 with others.  
648

649  
650 How might this complex code of chemosensory receptor co-expression be regulated? In  
651 vertebrates, an elaborate epigenetic silencing mechanism ensures that each olfactory neuron  
652 stochastically expresses only a single allele of a single odorant receptor (Bashkirova and  
653 Lomvardas, 2019). In contrast, *Drosophila melanogaster* is thought to use a more conventional  
654 transcription factor code in which the specification of a neuron and the expression of its  
655 chemosensory receptor is tightly regulated (Jafari and Alenius, 2015; Li et al., 2016; Ray et al.,  
656 2008). Single-cell sequencing data generated from developing *Drosophila melanogaster*  
657 olfactory neurons demonstrate a complex regulatory landscape in which a set of transcription  
658 factors govern receptor expression, axon targeting, or both (Li et al., 2020). Two recent studies  
659 documented extensive co-expression of co-receptors in *Drosophila melanogaster*, calling into

660 question the rules that regulate olfactory organization in this insect (McLaughlin et al., 2021;  
661 Task et al., 2021). It is yet to be determined if mosquito orthologues of these transcription  
662 factors have been co-opted to regulate the co-expression we observe or if this novel olfactory  
663 organization demands a distinct transcriptional mechanism.

664  
665 There are other examples of receptor co-expression within a single class of chemosensory  
666 receptor. Polycistronic expression of multiple odorant receptors in *Anopheles gambiae* sensory  
667 neurons has been reported (Karner et al., 2015). This differs from co-expressed receptors in  
668 *Aedes aegypti*, which are often not closely associated genes within the genome and suggests  
669 that other mechanisms of gene regulation must account for the co-expression we observe. A  
670 recent study also identified neurons in *Anopheles gambiae* that co-express *Orco* and *Ir76b*, but  
671 the extent of OR-IR co-expression in this species remains to be seen (Ye et al., 2021). In  
672 *Drosophila melanogaster* there are rare cases of OR-OR or OR-IR co-expression, which have  
673 been thought the exceptions rather than the rule. *Or35a* is co-expressed with *Ir76b* (Silbering  
674 et al., 2011), and while these neurons respond to many odorants (Silbering et al., 2011; Yao et  
675 al., 2005), the functional role of co-expression remains unknown. In *Drosophila melanogaster*,  
676 *Or49a* and *Or85f* are co-expressed in a specific olfactory sensory neuron population where  
677 they play redundant roles in predator avoidance (Ebrahim et al., 2015). Recent work suggests  
678 that there may be more examples to be discovered (McLaughlin et al., 2021; Task et al.,  
679 2021).

680  
681 Our findings are reminiscent of the nematode *Caenorhabditis elegans*, which copes with a very  
682 large number of chemosensory receptor genes and a very small number of sensory neurons  
683 by extensive receptor co-expression (Troemel et al., 1995; Vidal et al., 2018). *Aedes aegypti*  
684 mosquitoes have many more olfactory sensory neurons than *Caenorhabditis elegans*  
685 nematodes and the circuit organization also differs dramatically between the two. Another  
686 example of extensive olfactory receptor co-expression is seen in mice, where a subpopulation  
687 of olfactory sensory neurons each express multiple MS4a chemosensory receptors and project  
688 to the so-called necklace glomeruli that surround the main olfactory bulb (Greer et al., 2016).  
689 Interestingly these neurons respond to a number of cues that regulate innate behaviors, such  
690 as food odors and pheromones. Perhaps chemosensory receptor co-expression is more  
691 conducive to sensory systems that drive innate rather than learned behaviors.

### 692 693 **Maxillary palp chemosensory neurons go beyond a simple A, B, and C organization**

694 The maxillary palp is a multi-modal sensory organ that responds to CO<sub>2</sub> (Acree et al., 1968;  
695 Gillies, 1980; Grant et al., 1995), temperature (Roth, 1951), mechanical stimuli (Bohbot et al.,  
696 2014), attractive monomolecular odorants such as 1-octen-3-ol (Syed and Leal, 2007; Takken  
697 and Kline, 1989; Vythilingam et al., 1992), as well as blends of odorants extracted from human  
698 hosts (Tauxe et al., 2013). The prior view of the organization of the maxillary palp is that all  
699 volatile odorant-detecting capitate-peg sensilla house the sensory dendrites of three neurons  
700 that form identical repeating units: one large CO<sub>2</sub>-sensitive neuron that expresses *Gr3* (A cell),  
701 and two smaller neurons that express either *Or8-Orco* (B cell) or *Or49-Orco* (C cell) (Lu et al.,  
702 2007; McIver, 1972). It is difficult to reconcile the functional diversity of responses with this  
703 simple cellular organization. We demonstrate through multiplexed RNA *in situ* hybridization  
704 and snRNA-seq that the receptor composition of these neurons is far more complex, and they  
705 can be subdivided into many more than three cell types. Consistent with this idea, we found  
706 that B cells can be separated into different types based on their physiological response to  
707 volatile amines. This is revealed in *Ir25a* mutant animals, where the response to triethyl amine

708 and hexyl amine is abolished in most B cells, but a subset of neurons retains their responses  
709 to this compound. We found that *Ir76b* is expressed in a subset of the *Or8*-expressing B cells,  
710 as are *Ir161*, *Ir41a*, and *Ir41o*. It is possible that these IRs mediate amine responses in the  
711 subset of *Ir25a* mutant neurons that retain amine responses. It will be interesting to examine  
712 this possibility and to explore the heterogeneity of odorant responses across all maxillary palp  
713 neuron types.

714

### 715 **Receptor co-expression as a possible mechanism for robust mosquito attraction to** 716 **humans**

717 We hypothesize that receptor co-expression is used broadly to detect redundant cues that are  
718 present in human odor, a blend that can vary from individual to individual and contains  
719 hundreds of different chemicals (Bernier et al., 1999; Bernier et al., 2000; De Obaldia et al.,  
720 2022). Both volatile amines and 1-octen-3-ol are emitted from human skin (Bernier et al., 2000;  
721 Cork and Park, 1996 ; de Lacy Costello et al., 2014). It is possible that receptor co-expression  
722 is used to form a highly redundant detection system for different cues that represent the same  
723 ecological target: humans. This motif has the benefit of limiting the number of neurons needed  
724 to detect varied odorants with the same meaning. However, in exchange it may sacrifice the  
725 ability to distinguish between cues detected by receptors expressed in the same sensory  
726 neurons. In summary, our study reveals unexpected complexity in the gene expression and  
727 functional organization of the mosquito olfactory system that may explain the persistence of  
728 mosquitoes in hunting humans. Future attempts to refine the design of repellents to ward off  
729 mosquitoes or attractant traps to lure them will have to have to reckon with the complexity of  
730 this system.

731

### 732 **ACKNOWLEDGMENTS**

733 We thank Emily Dennis, Laura Duvall, Itzel Ishida, Philip Kidd, Erica Korb, Carolyn McBride,  
734 Christopher Potter, Darya Task, Zhilei Zhao, and members of the Vosshall Lab for comments  
735 on the manuscript; Gloria Gordon and Libby Mejia for expert mosquito rearing at Rockefeller  
736 and Mengistu Dawit Bulo for rearing strains at SLU; Javier Marquina-Solis for assistance with  
737 antennal lobe tracing; Priyanka Lakhiani and Julia Deere for participation in troubleshooting  
738 mosquito nuclei extraction; Christina Pyrgaki, Carlos Rico, Katarzyna Cialowicz, and Alison  
739 North at the Rockefeller Bio-Imaging Resource Center (RRID:SCR\_017791) for assistance  
740 with confocal imaging; Helen Duan, Bin Zhang, and Connie Zhao at the Rockefeller Genomics  
741 Core for quality control for snRNA-seq samples and 10X Genomics sequencing; Daniel Gross,  
742 James Petrillo, and Peer Strogies at the Rockefeller Precision Instrumental Technologies (PIT)  
743 Resource Center for advice and fabrication of custom equipment; Olena Riabinina and  
744 Christopher Potter for advice and for providing Q-system reagents prior to publication; Carolyn  
745 McBride, Matthew DeGennaro, and members of the *Aedes* Toolkit Group for advice and  
746 discussion; Caroline Jiang for advice on statistical analysis; Nipun Basrur, Priya  
747 Rajasethupathy, Andrea Terceros, Harry Choi, and Molecular Instruments for advice on RNA  
748 *in situ* hybridization experiments; Andrea Terceros, Andras Sziraki, Junyue Cao, and 10X  
749 Genomics for advice on mosquito nuclei extraction and analysis; Rob A. Harrell II at the Insect  
750 Transgenesis Facility at the University of Maryland for embryo injections; Raphael Cohn, Gaby  
751 Maimon, Cory Root, Vanessa Ruta, and Ari Zolin for useful discussions; and Frances Weis-  
752 Garcia and the members of the MSKCC Antibody and Bioresource Core Facility for  
753 preparation of the nc82/Brp monoclonal antibody.



754 **FUNDING**

755 This work was supported in part by grant # UL1 TR000043 from the National Center for  
756 Advancing Translational Sciences (NCATS) National Institutes of Health (NIH) Clinical and  
757 Translational Science Award (CTSA) program. Funding for this study was provided by Jane  
758 Coffin Childs Postdoctoral Fellowships (M.A.Y., B.J.M), The Grass Foundation Grass Fellows  
759 Program (M.A.Y.), a Leon Levy Neuroscience Fellowship (M.A.Y.), a Quadrivium Award for  
760 Innovative Research in Epigenetics (M.H., L.B.V.) and by a pilot grant (M.A.Y.) and  
761 postdoctoral (M.A.Y.) and graduate (M.H., O.V.G.) fellowships from the Kavli Neural Systems  
762 Institute, and NIH NIDCD grant F30DC017658 (M.H.). This material is based upon work  
763 supported by the National Science Foundation Graduate Research Fellowship under Grant No.  
764 1946429 to O.V.G. B.J.M. received support from National Sciences and Engineering Research  
765 Council (NSERC) under award RGPIN-2020-05423. M.H. is supported by a Medical Scientist  
766 Training Program grant from the National Institute of General Medical Sciences of the NIH  
767 under award number T32GM007739 to the Weill Cornell/Rockefeller/Sloan Kettering Tri-  
768 Institutional MD-PhD Program. Hongjie Li is a CPRIT Scholar in Cancer Research (RR200063)  
769 and supported by National Institutes of Health (R00AG062746). Rickard Ignell is the recipient  
770 of a SLU Vice-Chancellor's Senior Career Grant. Antibody purification carried out at the  
771 MSKCC Antibody and Bioresource Core Facility was supported by a Cancer Center Core  
772 Grant 5 P30 CA008748-54. L.B.V. is an investigator of the Howard Hughes Medical Institute.

773  
774 **AUTHOR CONTRIBUTIONS**

775 M.A.Y. carried out all central tissue immunostaining. M.H. carried out all peripheral tissue  
776 immunostaining and RNA *in situ* hybridization experiments. B.J.M. provided chemosensory  
777 gene and transcript analysis. Z.G. cloned and isolated Split-QF2 lines with M.H. Z.N.G. cloned  
778 and isolated QF2 stop codon replacement lines with B.J.M. and M.A.Y. S.R. worked with M.H.  
779 to generate RNA *in situ* hybridization data. O.V.G. collected all tissue for snRNA-seq together  
780 with M.H. and M.A.Y. O.V.G. processed tissue for snRNA-seq experiments at Rockefeller. At  
781 Baylor, Y.Q. carried out sample preparation, flow cytometry, and 10X Genomics library  
782 preparation. T.-C.L. carried out snRNA-seq data analysis including read alignment, quality  
783 checking, and cell and gene filtering. O.V.G. carried out additional downstream analysis. T.-  
784 C.L. together with O.V.G. generated the figure panels for [Figure 5](#) and [Figure 7](#). H.L.  
785 supervised Y.Q and T.-C.L. and oversaw snRNA-seq experimental design and data analysis.  
786 The single sensillum recordings in [Figure 8A-E](#) were carried out by M.G. and those in [Figure](#)  
787 [8F-I](#) were carried out by G.C.-V. R.I. supervised M.G. and G.C.-V. and analyzed all of the data  
788 in [Figure 8](#) together with M.G. and G.C.-V. M.A.Y., M.H., and L.B.V. together conceived the  
789 study, designed the figures, and wrote the paper with input from all authors.

790  
791 **DECLARATION OF INTERESTS**

792 The authors declare no competing interests.

793  
794

# Figure 1

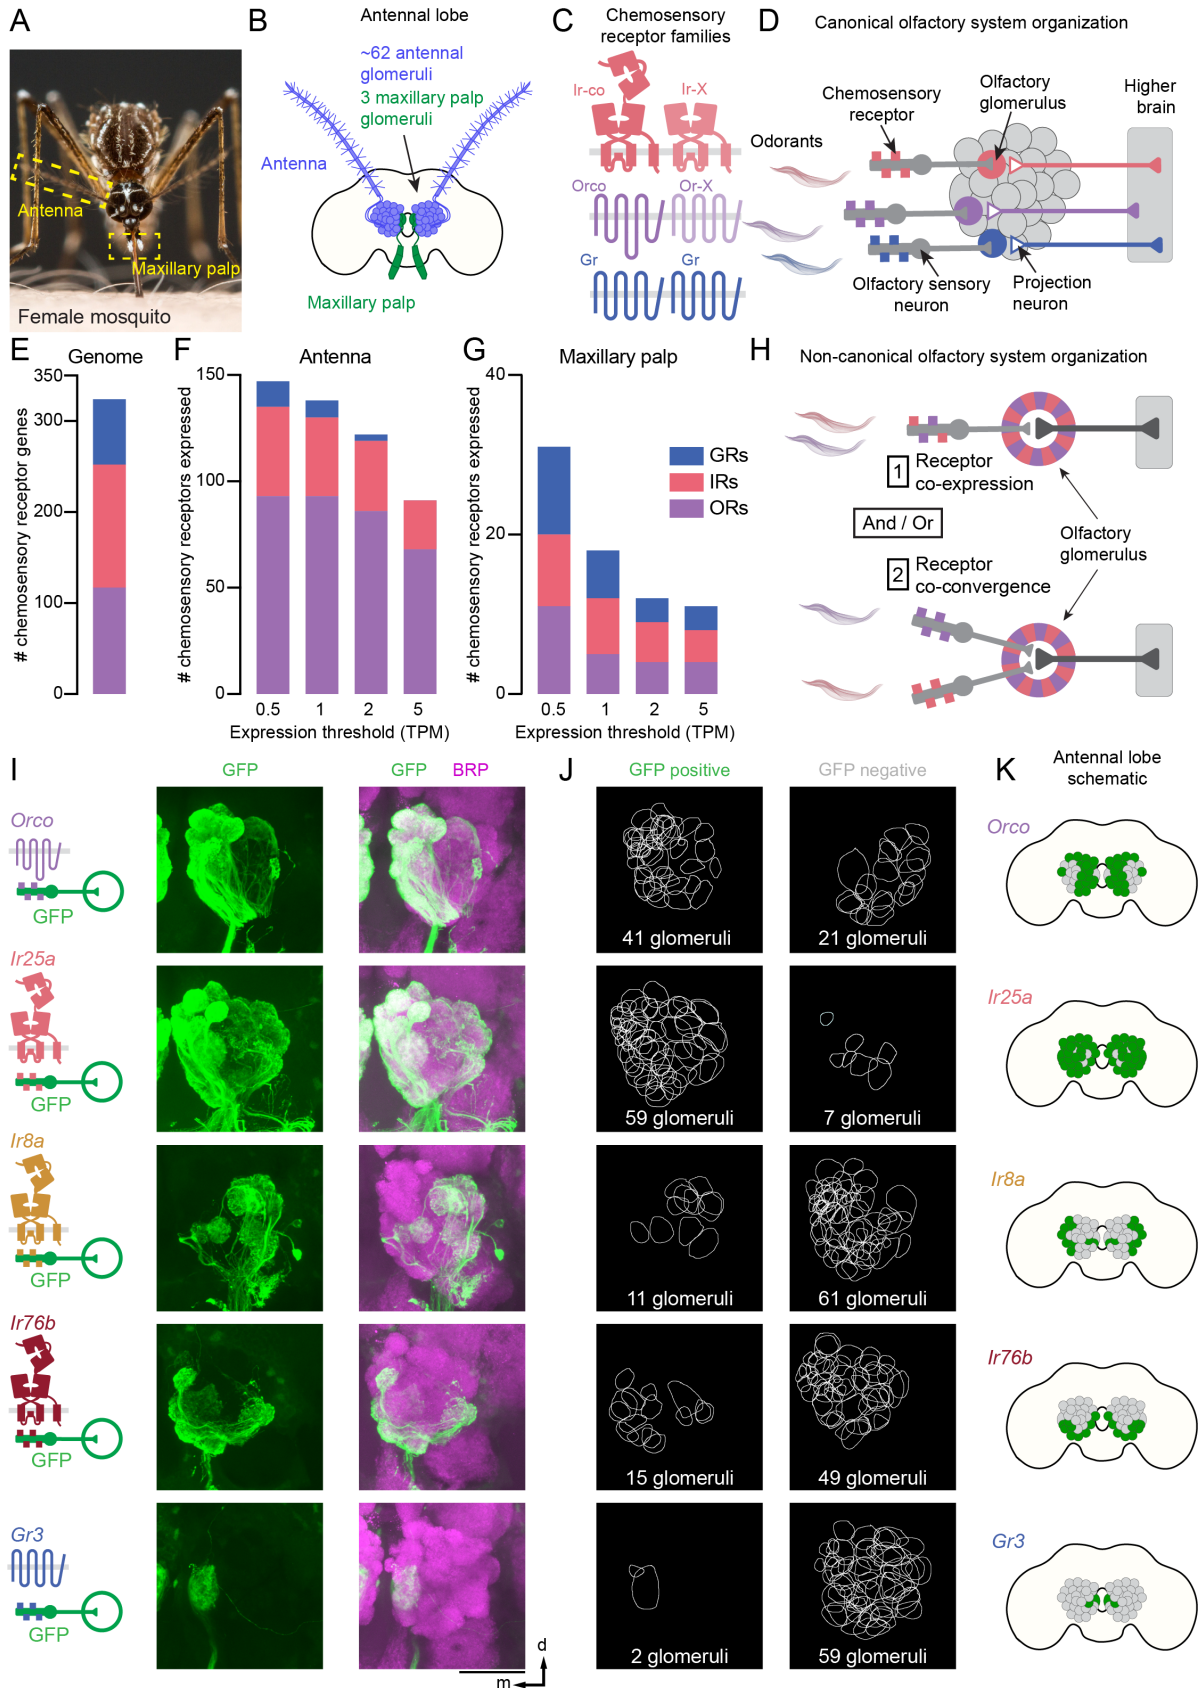

796 **Figure 1: Mismatch in chemosensory receptor and olfactory glomerulus number**  
797 **(A)** *Aedes aegypti* female with sensory structures (yellow boxes). **(B)** Approximate number of  
798 antennal lobe glomeruli per brain hemisphere innervated by the indicated sensory structure,  
799 derived from quantification of the left antennal lobe in 12 brains presented in (I-J) and **Figure**  
800 **S2-S5**. See also **Figure S1**. **(C)** Cartoons of insect chemosensory gene families.  
801 **(D)** Cartoon of canonical olfactory system organization. **(E-G)** Stacked bar plots of the number  
802 of chemosensory genes in the *Aedes aegypti* genome (E), and the number expressed above  
803 the indicated TPM thresholds in the antenna (F) and maxillary palp (G). **(H)** Two models of  
804 non-canonical olfactory system organization. **(I)** Maximum-intensity projections of confocal Z-  
805 stacks of antennal lobes in the left brain hemisphere of the indicated genotype with  
806 immunofluorescent labeling of GFP (green) and the nc82 monoclonal antibody, which  
807 recognizes Brp (magenta). Brp is used throughout this paper as a synaptic marker (Wagh et  
808 al., 2006). Scale bar: 50  $\mu\text{m}$ . Orientation: d=dorsal, m=medial. **(J)** 2-D representation of the  
809 boundary of each glomerulus in (I) that is GFP positive or GFP negative. See also **Figure S2-**  
810 **S6**. **(K)** Cartoon schematic of the antennal lobe regions receiving projections from olfactory  
811 sensory neurons expressing the indicated chemosensory receptor.

812  
813

## Figure 2

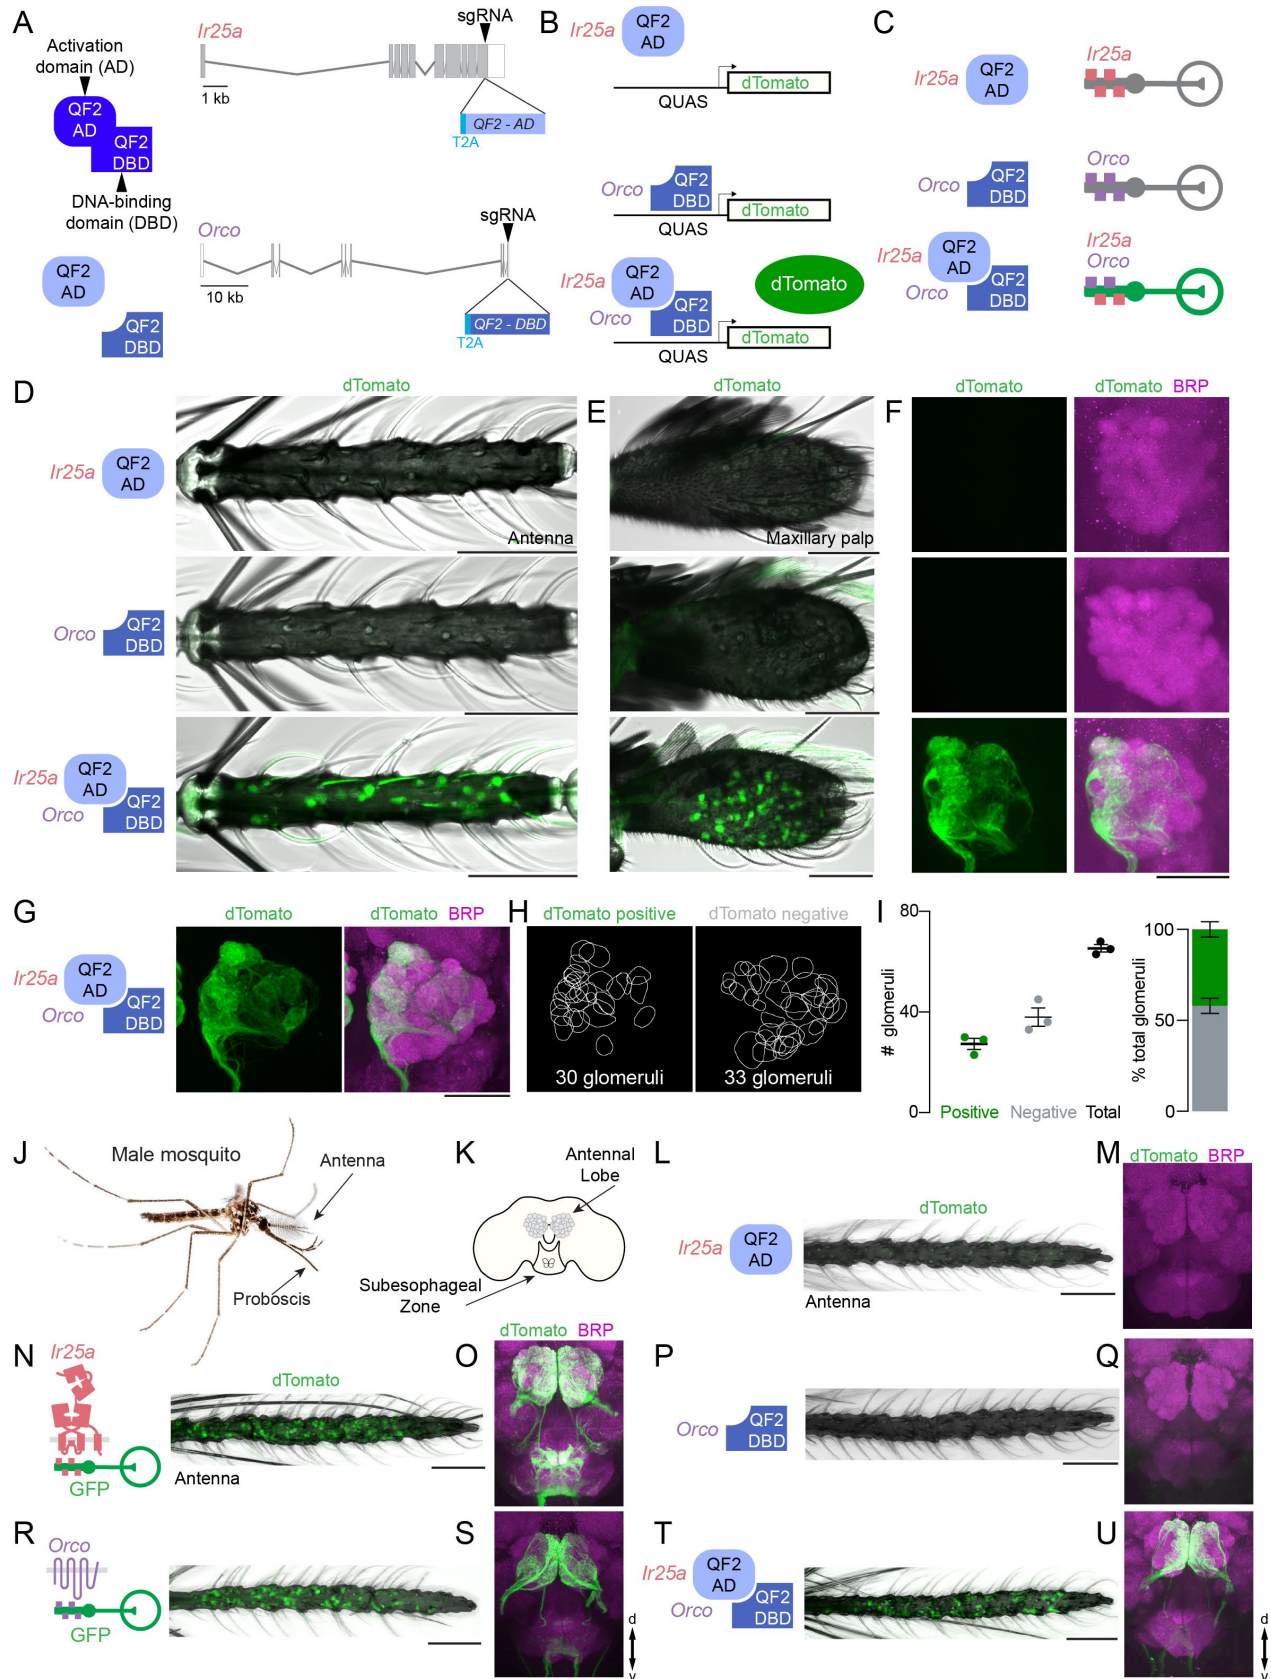

815 **Figure 2. Genetic evidence for widespread *Orco* and *Ir25a* co-expression**  
816 (A) Schematic of the Split-QF2 system (left) and diagrams of *Orco* and *Ir25a* gene loci with  
817 exons (grey boxes), introns (grey lines) and CRISPR-Cas9 gRNA site (arrowhead) used to  
818 insert *T2A-QF2-AD* (light blue) and *T2A-QF2-DBD* (medium blue). AD and DBD gene maps  
819 are not to scale. (B-C) Schematic of the Split-QF2 system (B) and outcome of gene expression  
820 in olfactory sensory neurons of the indicated genotypes (C). (D-E) Maximum-intensity  
821 projections of confocal Z-stacks of female antennae (D) and female maxillary palps (E) of the  
822 indicated genotypes showing intrinsic dTomato fluorescence, with transmitted light overlay.  
823 See also [Figure S7A,B](#). (F-G) Maximum-intensity projections of confocal Z-stacks of antennal  
824 lobes from the left brain hemisphere of the indicated genotype with immunofluorescent labeling  
825 of dTomato (green) and Brp (synaptic marker, magenta). See also [Figure S8](#). (H-I) 2-D  
826 representation of the boundary of each glomerulus in (G) that is GFP positive or GFP negative  
827 (H) and quantification (I). Data are presented as mean±SEM, n=3. See also [Figure S7C](#). (J)  
828 *Aedes aegypti* male with sensory structures (arrows). (K) Cartoon schematic of the brain  
829 including the antennal lobe glomeruli and the suboesophageal zone. (L-U) Maximum-intensity  
830 projections of confocal Z-stacks of male antennae (L,N,P,R,T) and male brains (M,O,Q,S,U) of  
831 the indicated genotype with immunofluorescent labeling of dTomato (green) and Brp (synaptic  
832 marker, magenta). Scale bars: 50 µm. Orientation: proximal left (D, E, L, N, P, R, T), medial left  
833 (F,G); d=dorsal, v=ventral, m=medial.

834  
835

## Figure 3

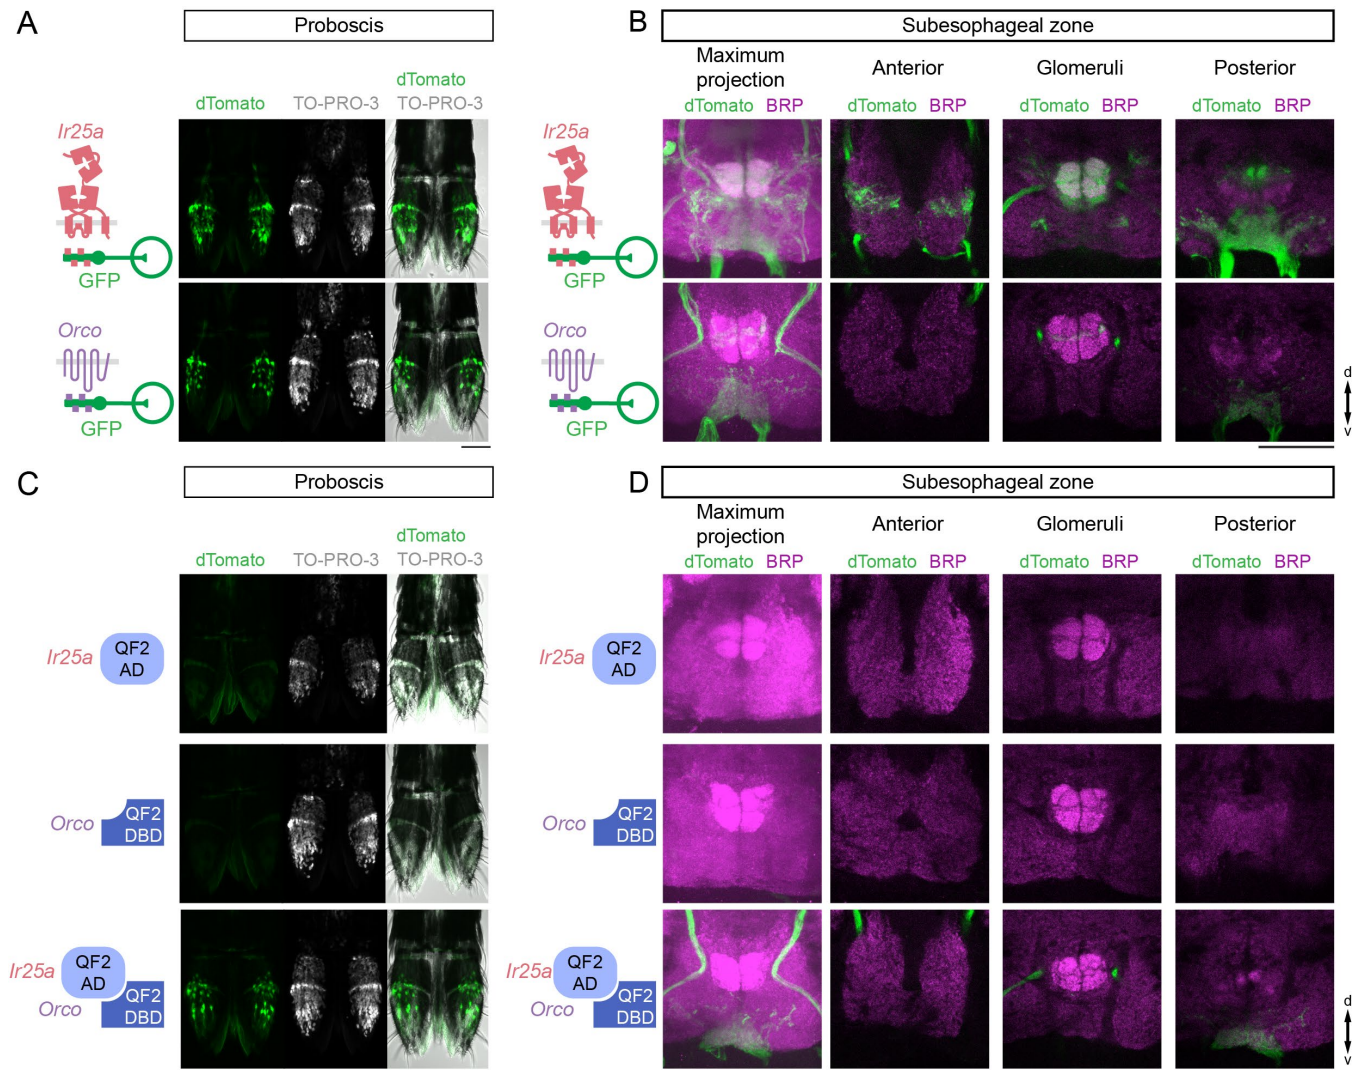

837

838

839

840

841

842

843

844

845

### Figure 3. *Orco* and *Ir25a* co-expression in the mosquito proboscis

(A, C) Maximum-intensity projection of whole-mount dTomato (green) expression and TO-PRO-3 nuclear stain (white) in female proboscises of the indicated genotypes. (B, D) Left panel, maximum-intensity projections of confocal Z-stacks of subesophageal zone from the indicated genotypes with immunofluorescent labeling of dTomato (green) and Brp (synaptic marker, magenta). Right three panels, single confocal sections through indicated areas of the subesophageal zone. Orientation: proximal up (A,C); d=dorsal, v=ventral (B,D). Scale bars: 50  $\mu$ m.

846  
847

## Figure 4

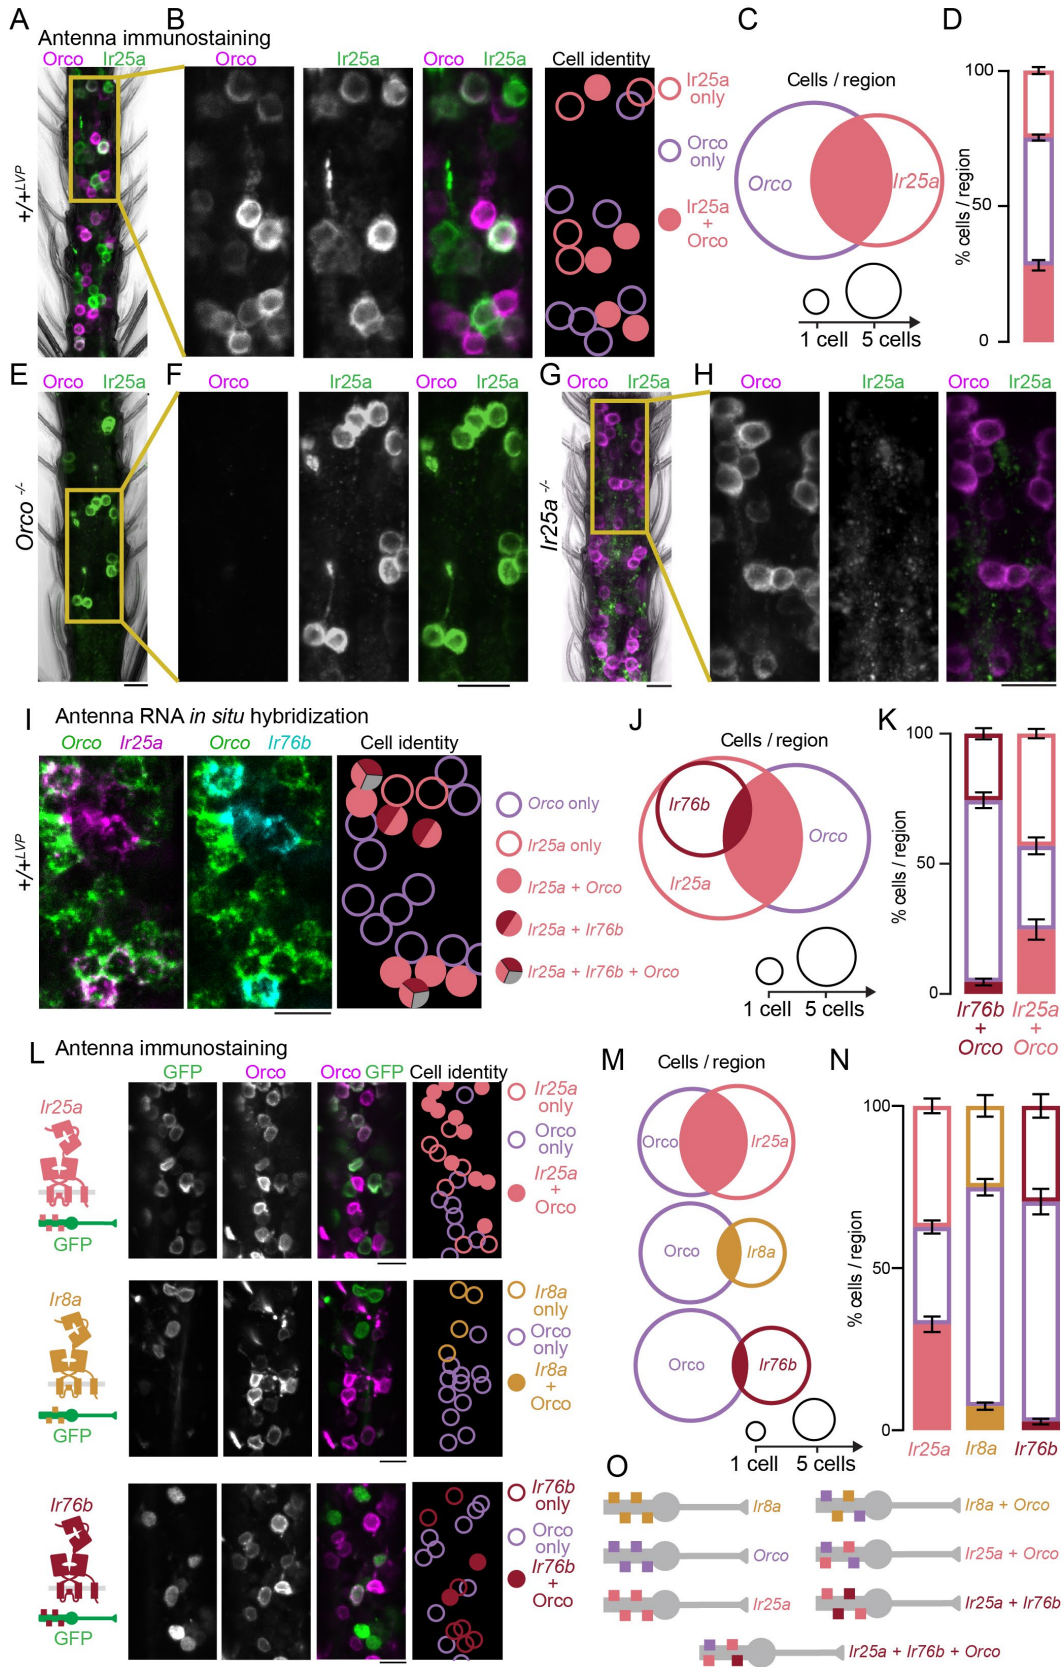

849 **Figure 4. Extensive chemosensory co-receptor co-expression in the antenna**  
850 **(A)** Maximum-intensity projection of whole-mount Orco and Ir25a immunostaining in wild-type  
851 female antennae. **(B)** Enlarged view of the yellow rectangle in (A) with cartoon schematic  
852 indicating cell identity at the right. **(C,D)** Quantification of antennal cells in the indicated  
853 genotypes co-expressing Orco and Ir25a presented as Euler diagrams with area scaled to  
854 mean cells/region (C) and stacked bar plots (D). Data are presented as mean±SEM, n=7  
855 antennal segments, 48-61 cells/region. **(E,G)** Maximum-intensity projection of whole-mount  
856 Orco and Ir25a immunostaining in *Orco*<sup>16/16</sup> mutant **(E)** and Ir25a<sup>BamHI/BamHI</sup> mutant **(G)** female  
857 antennae. **(F,H)** Enlarged view of the yellow rectangles in (E,G). **(I)** RNA *in situ* hybridization in  
858 wild-type antennae with the indicated probes. **(J,K)** Quantification of wild-type antennal cells  
859 expressing the indicated genes as Euler diagrams with area scaled to mean cells/region (J),  
860 and stacked bar plots (K). Data are presented as mean±SEM, n=4 antennal segments, 45-63  
861 cells/region. **(L)** Maximum-intensity projection of whole-mount Orco and GFP immunostaining  
862 in female antennae of the indicated genotypes with cartoon schematic indicating cell identity at  
863 the right. **(M,N)** Quantification of antennal cells in the indicated genotypes co-expressing Orco  
864 protein and GFP presented as Euler diagrams with area scaled to mean cells/region (M) and  
865 stacked bar plots (N). Data are presented as mean±SEM, n=6-8 antennal segments, 34-68  
866 cells/region. **(O)** Cartoon schematic of olfactory sensory neuron populations identified in this  
867 figure. Scale bars: 10 μm.



868  
869

## Figure 5

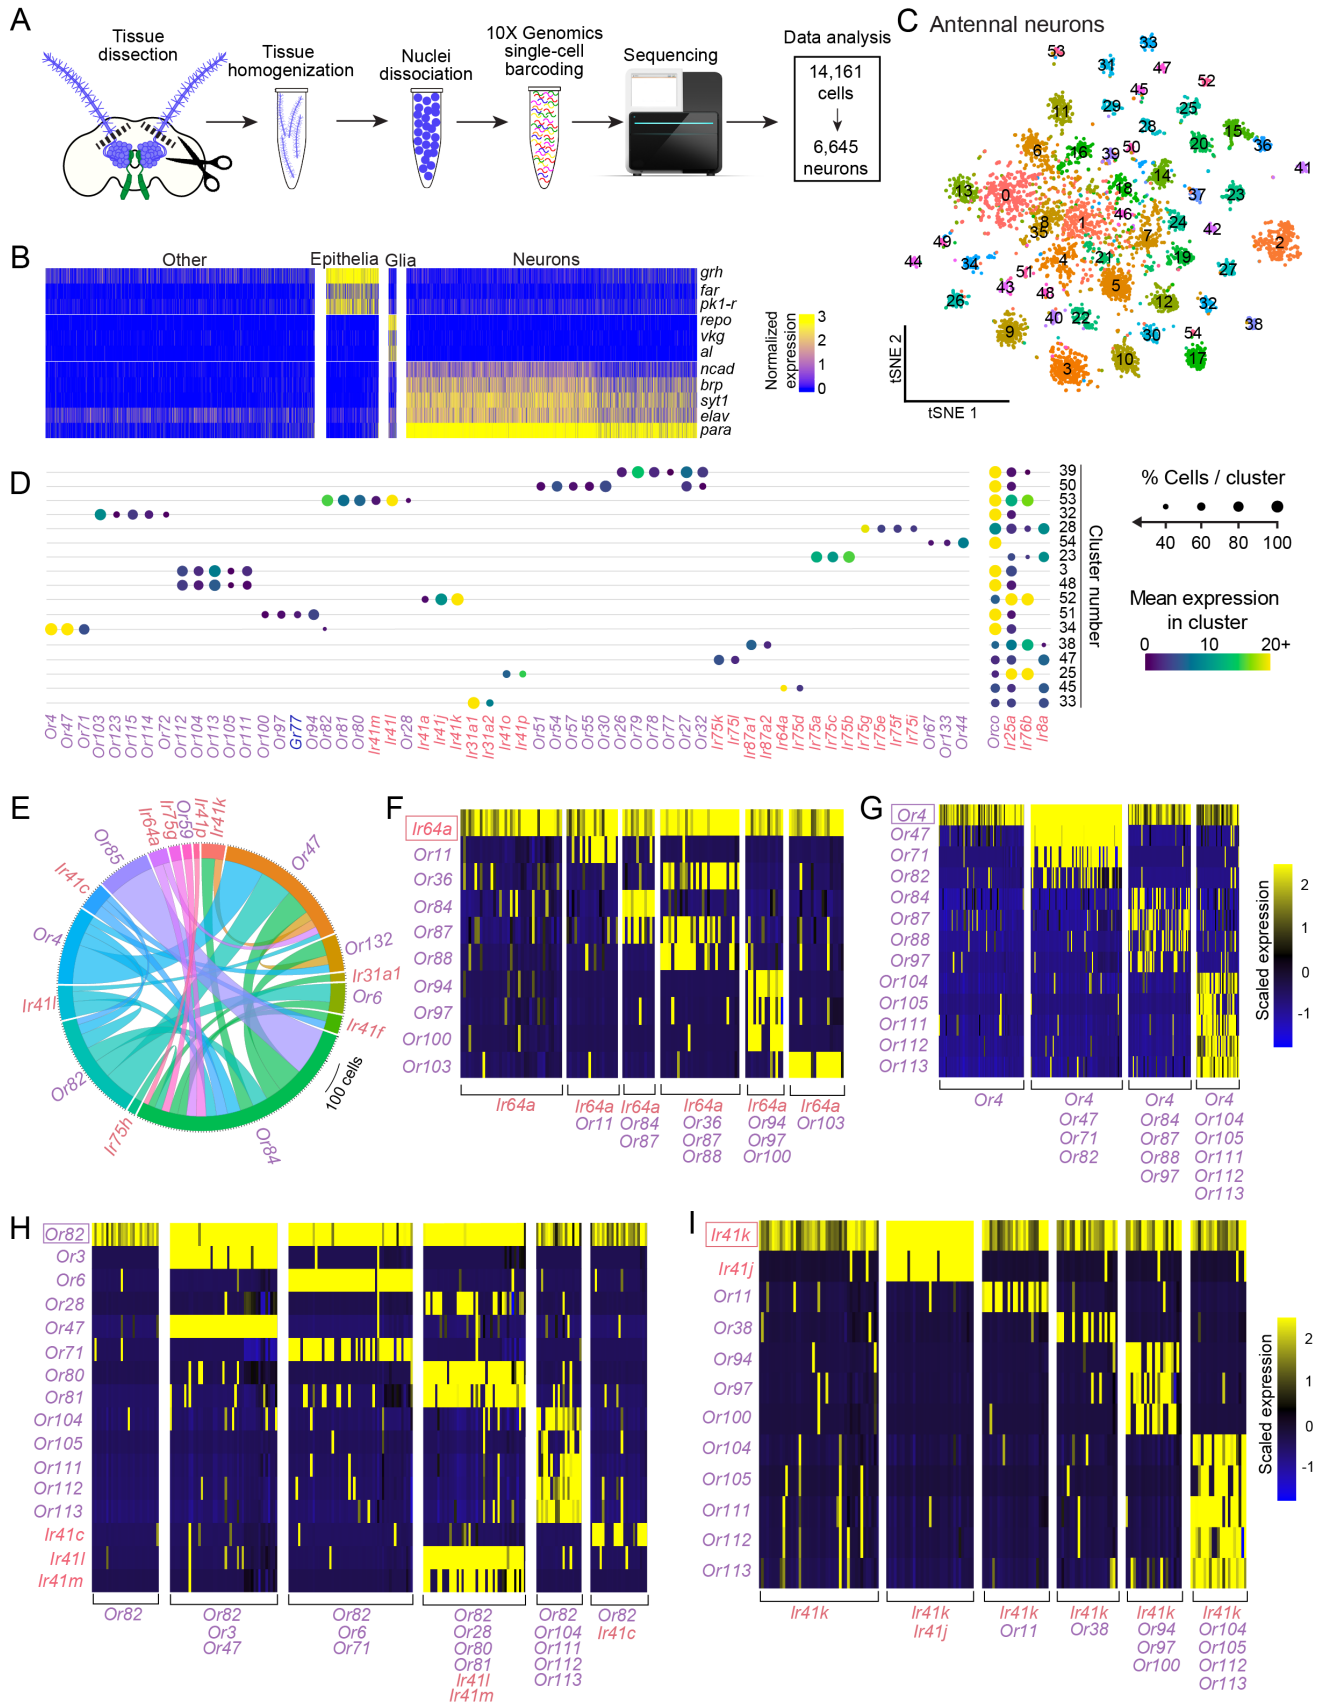

871 **Figure 5: Antennal snRNA-seq reveals complex chemosensory receptor co-expression**  
872 (A) Schematic of female antenna snRNA-seq workflow. (B) Heat map of cells in the antenna  
873 grouped according to normalized expression [ $\log(\text{UMI of gene} \times 10,000 / \text{total UMI of cell} + 1)$ ] of  
874 cell type marker. (C) t-distributed stochastic neighbor embedding (t-SNE) plot of antennal  
875 neurons annotated by cluster (See [Figure S9I](#)). (D) Dot plot summarizing chemosensory  
876 receptor expression in selected clusters (see [Figure S10A](#) for full dot plot). Circle size  
877 represents % of cells in each cluster that express a given gene above a normalized expression  
878 threshold of 1 UMI of gene\*10,000/total UMI of cell. Scale indicates mean expression within a  
879 cluster. All circles representing a mean expression value greater than 20 have the same color.  
880 Circles for clusters with below 35% of cells expressing the indicated chemoreceptor gene are  
881 not included in plot (See [Figure S10B](#)). (E) Chord plot of co-expressed pairs of chemosensory  
882 receptors taken from within the 20 highest-expressed ligand-selective receptors. Genes  
883 depicted were above a normalized expression threshold of 1  $\log(\text{UMI of gene} \times 10,000 / \text{total UMI}$   
884  $\text{of cell} + 1)$  and all pairs shown were co-expressed in more than 20 nuclei. (F-I) Simplified  
885 heatmaps of selected cells, chemosensory receptors, and co-expression patterns using *Ir64a*  
886 (F), *Or4* (G), *Or82* (H), or (I) *Ir41k* to select cell types. Scaled expression: Z-score. Receptors  
887 are indicated in rows, and cells in columns. Visually-identified cell types are offset with  
888 brackets listing the chemosensory receptors expressed in that cell type. See also [Figure S11](#).

889  
890

## Figure 6

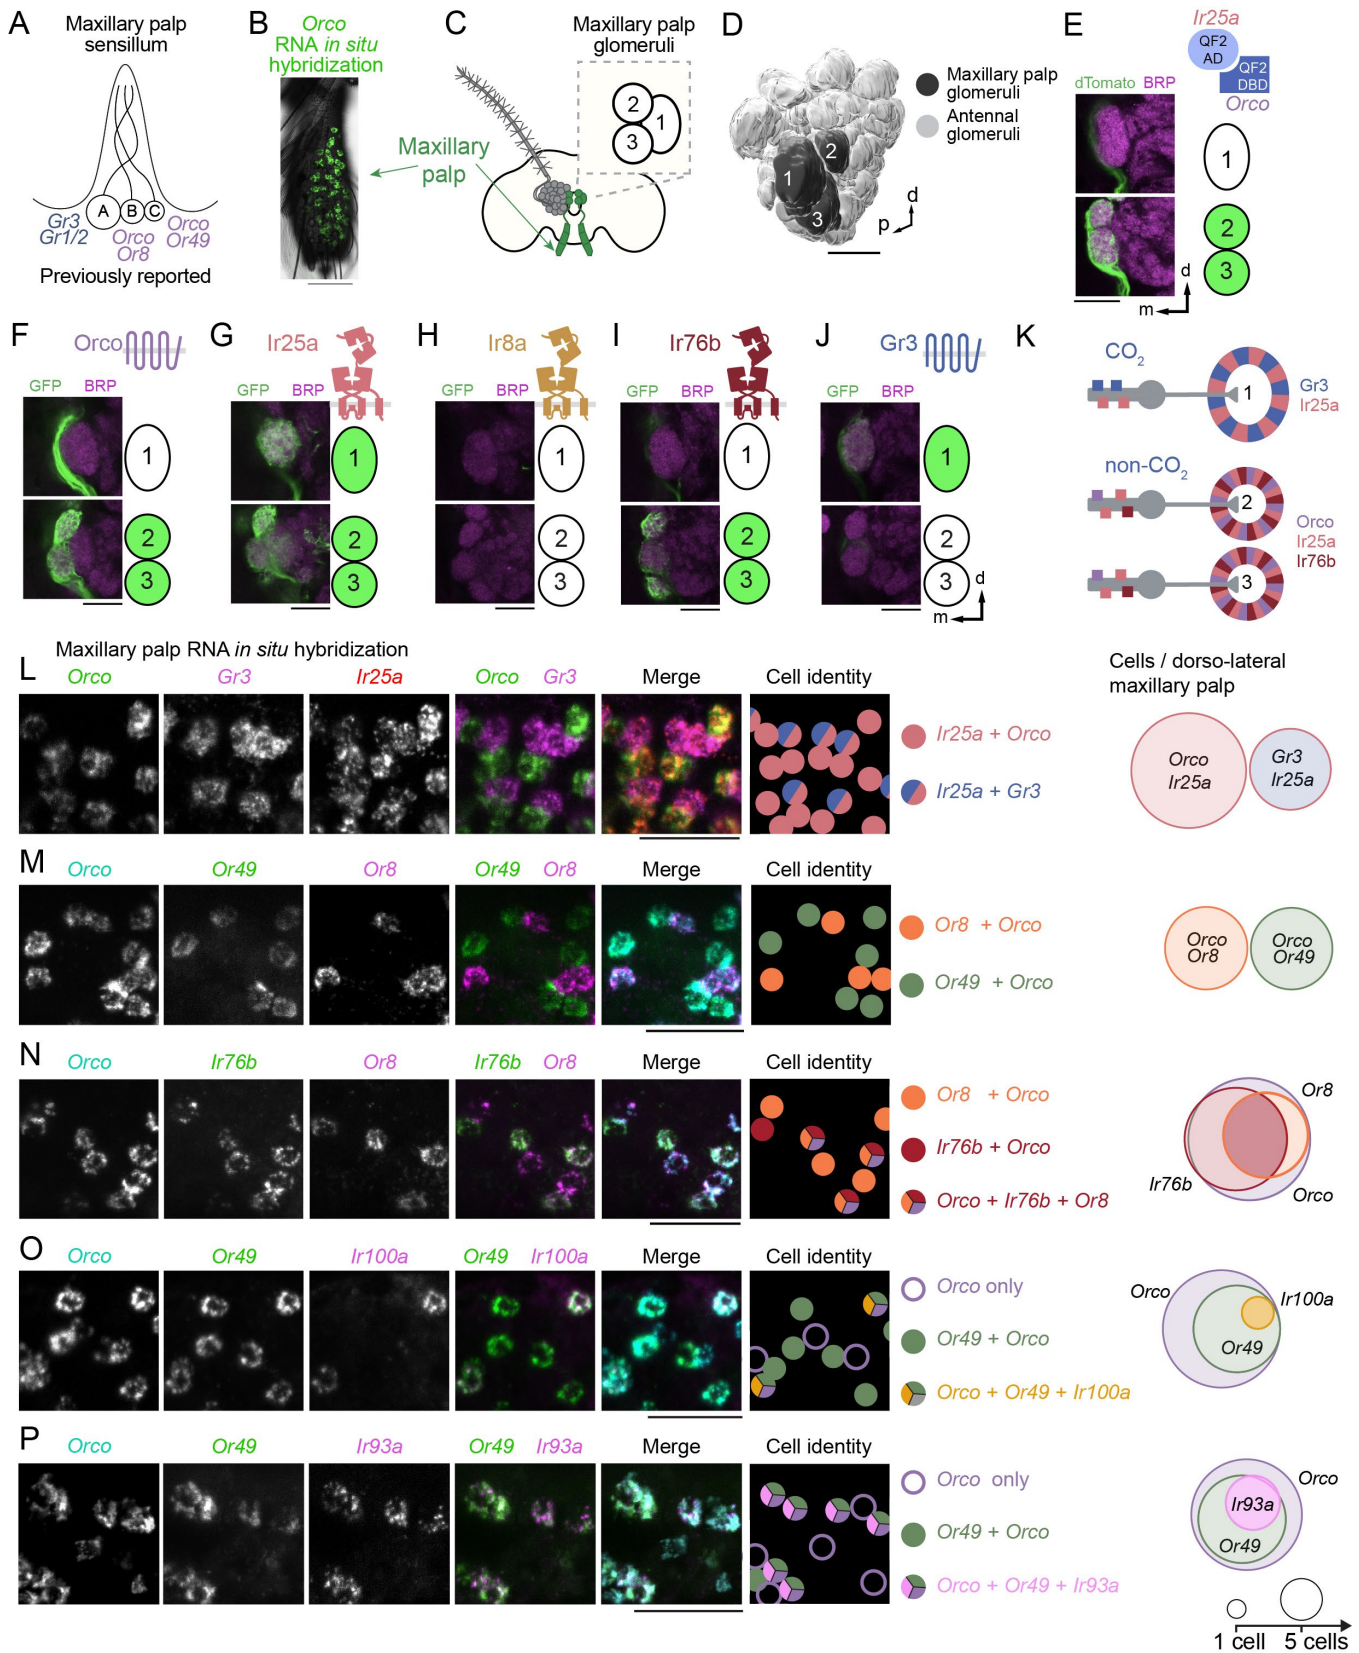

892

893 **Figure 6. Coordinated co-expression of chemosensory receptors in the maxillary palp**  
894 **(A)** Schematic of a single capitata-peg sensillum in the maxillary palp, with A, B, and C cells  
895 and the previously reported chemosensory receptor expression. **(B)** Maxillary palp expression  
896 of *Orco* in the fourth segment of the maxillary palp revealed by whole-mount RNA *in situ*  
897 hybridization. Orientation: proximal up. **(C)** Cartoon indicating maxillary palp (green) and 3  
898 glomeruli that are innervated by the maxillary palp. **(D)** 3-D antennal lobe reconstruction  
899 showing 3 glomeruli that are innervated by the maxillary palp. **(E-J)** Single confocal sections  
900 through the center of Glomerulus 1 (top) or Glomerulus 2 and Glomerulus 3 (bottom) in left  
901 antennal lobes of the indicated genotypes. Sections are taken from Z-stacks presented in  
902 **Figure 2G** (E) and **Figure 1I** (F-J). **(K)** Schematic of sensory neuron gene expression and  
903 glomerular convergence based on (E-J). **(L-P)** Whole-mount maxillary palp RNA *in situ*  
904 hybridization with the indicated probes, cartoon schematic indicating cell identity, and  
905 quantification of co-expression shown as Euler diagrams, area scaled to mean. n=5 maxillary  
906 palps, 26-65 cells/dorso-lateral maxillary palp. See also **Figure S12**. Scale bars: 50  $\mu\text{m}$  (B), 25  
907  $\mu\text{m}$  (E-J, L-P). Orientation: d=dorsal, m=medial, p=posterior.

908  
909

## Figure 7

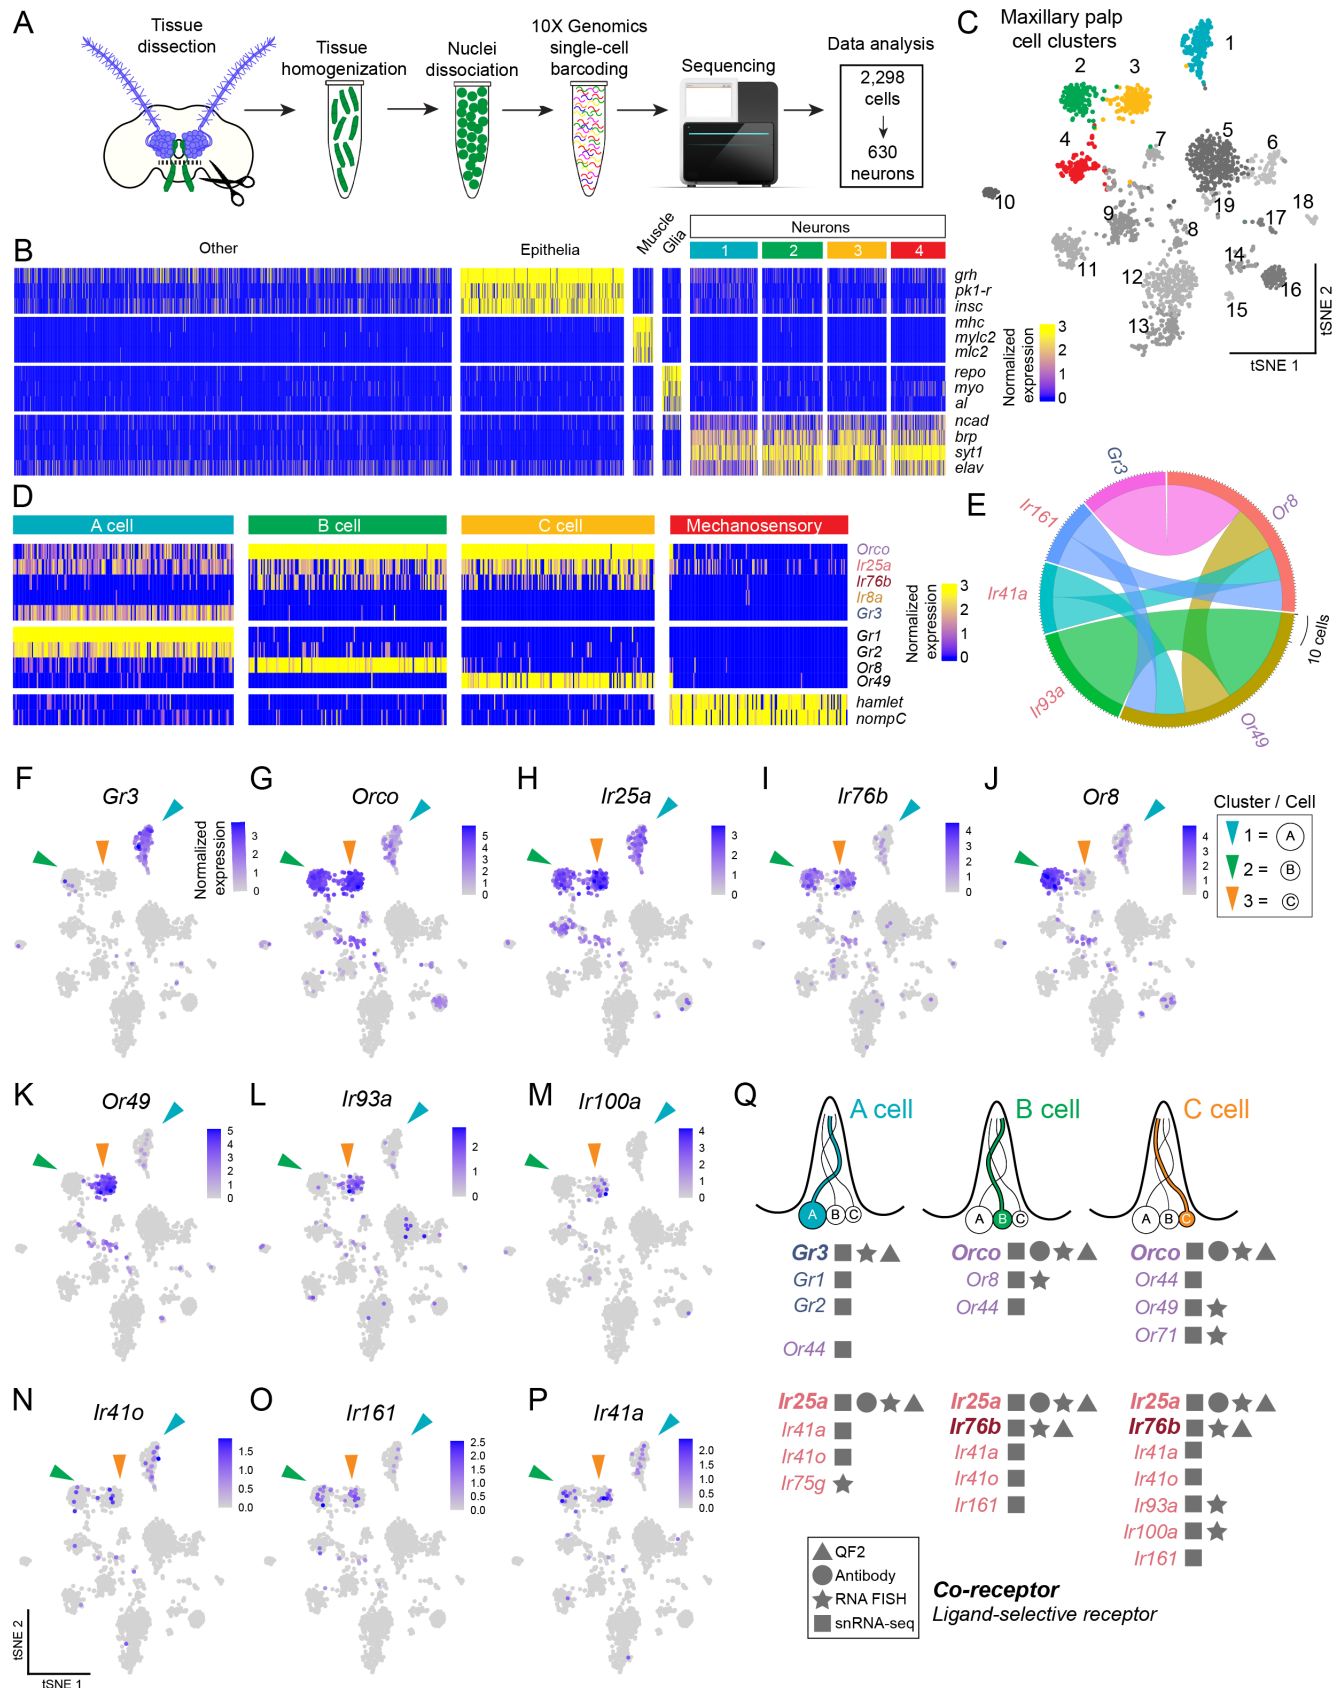

911 **Figure 7: Maxillary palp snRNA-seq reveals unanticipated neuronal complexity**  
912 (A) Schematic of female maxillary palp snRNA-seq workflow. (B) Heat map of nuclei in the  
913 maxillary palp grouped according to cell type marker expression. (C) tSNE plot of maxillary  
914 palp nuclei. (D) Heat map of normalized expression of selected genes in 4 identified neuron  
915 clusters. See also [Figure S13G-H](#). (E) Chord plot of co-expressed pairs of ligand-selective  
916 receptors that are present in more than 10 cells. To be considered positively expressed within  
917 a cell, gene must meet a normalized expression threshold of  $1 \log(\text{UMI of gene} * 10,000 / \text{total}$   
918  $\text{UMI of cell} + 1)$ . (F-P) Feature plots illustrating normalized expression [ $\log(\text{UMI of gene} * 10,000 /$   
919  $\text{total UMI of cell} + 1)$ ] of indicated genes visualized on tSNE plot (see [Figure S14](#)). (Q)  
920 Summary of chemosensory receptor expression in the maxillary palp based on all  
921 experimental data in this study (RNA FISH: fluorescent RNA *in situ* hybridization).

922  
923

## Figure 8

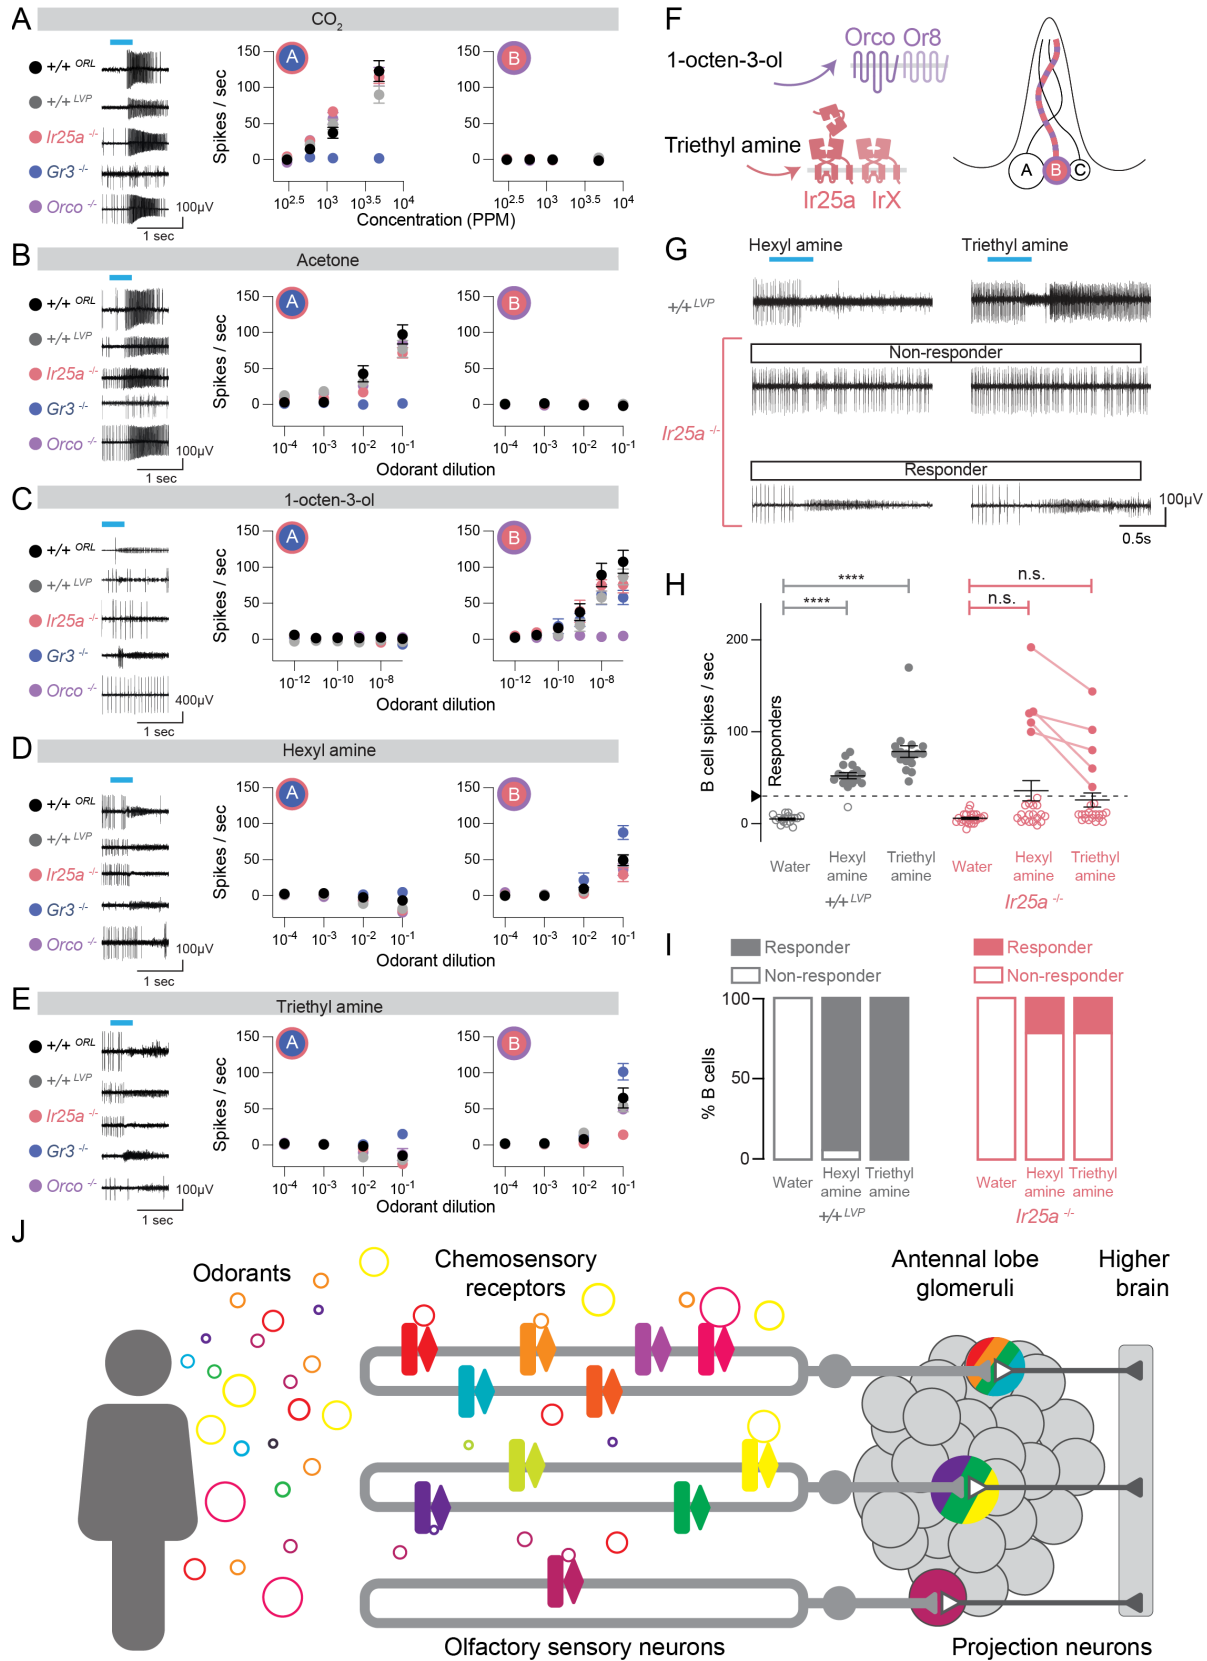

925 **Figure 8: Functional consequences of chemosensory receptor co-expression**  
926 (A-E) Left, sample traces from maxillary palp single sensillum recordings in each indicated  
927 genotype for (A) CO<sub>2</sub>, (B) acetone, (C) 1-octen-3-ol, (D) hexyl amine, and (E) triethyl amine.  
928 Stimulus delivery window is indicated by the cyan bar. Middle and right, the number of  
929 spikes/sec in the A cell (middle) and B cell (right) for each indicated concentration of the  
930 stimulus. Data are presented as mean±SEM, n=4-16 recordings from separate sensilla. (F)  
931 Schematic of an individual sensillum containing 3 neurons, A, B, and C. Receptor odorant  
932 parings for the B neuron are schematized. The identity of the ligand-selective IrX subunit is  
933 unknown. (G) Sample traces for +/+<sup>LVP</sup> (top) and *Ir25a*<sup>BamHI/BamHI</sup> (bottom) with each indicated  
934 stimulus. Stimulus delivery window is indicated by the cyan bar. (H,I) Quantification of  
935 recordings from indicated genotypes shown as dot plots (H) and the stacked bar plots (I)  
936 showing the percent of total recordings from each genotype that responded to the stimulus  
937 (filled circles) and those that did not (open circles), with 30 spikes/sec defined as response  
938 threshold. Data are presented as mean±SEM, n=17 (+/+<sup>LVP</sup>) and n=23 *Ir25a*<sup>BamHI/BamHI</sup>  
939 recordings from separate sensilla, n.s., not significant (p=0.1453 for hexyl amine and p=0.1642  
940 for triethyl amine), \*\*\*\*p<0.0001, one-way ANOVA with Kruskal-Wallis test for multiple  
941 comparisons. (J) A revised model of chemosensory coding in *Aedes aegypti* based on this  
942 study.



## 943 **Materials and Methods**

944

### 945 **Human and animal ethics statement**

946 Blood-feeding procedures and behavioral experiments with live hosts were approved and  
947 monitored by The Rockefeller University Institutional Animal Care and Use Committee (IACUC  
948 protocol 17018) and Institutional Review Board (IRB protocol LV-0652), respectively. Human  
949 volunteers gave their written informed consent to participate.

950

### 951 **Mosquito rearing and maintenance**

952 *Aedes aegypti* wild-type laboratory strains (Liverpool and Orlando), CRISPR-Cas9 knock-in,  
953 and piggyBAC *QUAS* transgenic strains were maintained and reared at 25 – 28°C, 70-80%  
954 relative humidity with a photoperiod of 14 hr light: 10 hr dark as previously described  
955 (DeGennaro et al., 2013). Adult mosquitoes were provided constant access to 10% sucrose.  
956 For routine strain maintenance, animals were primarily blood-fed on live mice and occasionally  
957 on live human volunteers. Newly generated strains were blood-fed on human volunteers until  
958 they were established. All experiments except those in [Figure 2J-T](#) were conducted on adult  
959 female mosquitoes. Detailed genotypes used in each figure can be found in [Data File 1](#).

960

### 961 **Generation of chemosensory receptor *QF2* and Split-*QF2* knock-in strains**

962 *T2A-QF2* gene-sparing stop codon replacement lines were generated using the strategy  
963 outlined in Matthews et al. (Matthews et al., 2019). sgRNAs were placed as close to the stop  
964 codon as possible and donor constructs were designed to remove the stop codon and replace  
965 it with an in-frame cassette containing the *T2A* ribosomal skipping sequence and the *QF2*  
966 transcription factor or Split-*QF2* domains, comprising the *QF2* activation domain *QF2-AD*, or  
967 the *QF2* DNA-binding domain *QF2-DBD*. This strategy spares the function of the gene at the  
968 locus being targeted, expresses *QF2* or Split-*QF2* domains in the cells specified by enhancers  
969 at the locus. Insertions were marked by the *3xP3* enhancer expressing a fluorescent protein.  
970 To identify effective sgRNAs, 5 candidate sgRNAs per gene were first injected into separate  
971 pools of 500 Liverpool embryos and CRISPR-Cas9-mediated cut rate was evaluated as  
972 previously described (Kistler et al., 2015). Either a single sgRNA or 2 sgRNAs with the highest  
973 cut rates were then chosen to be injected with donor plasmids to target chemosensory gene  
974 loci using homology-directed repair. sgRNAs targeted the respective gene near the stop  
975 codon, target sequence with protospacer adjacent motif (PAM) underlined:

976 *Ir25a*: GTTTGTGTGCGTGTCCGTA TGG

977 *Ir76b*: GTATTACACTTATCTAAATA TGG

978 *Ir8a*: GTCACGCTTGTGTACAGGG CGG, GAACAATTTGAACAAGGTCG TGG

979 *Gr3*: GTTAGTGATGCATAATATGA CGG

980 *Orco*: GTCACCTACTTCATGGTGT TGG

981 sgRNA DNA template was prepared by annealing oligonucleotides as described (Kistler et al.,  
982 2015). *In vitro* transcription was performed using HiScribe Quick T7 kit (NEB E2050S)  
983 following the manufacturer's directions. Following transcription and DNase treatment for 15  
984 min at 37°C, sgRNA was purified using RNase-free SPRI beads (Ampure RNAClean,  
985 Beckman-Coulter A63987), and eluted in Ultrapure water (Invitrogen, 10977-015).

986 Donor plasmids were constructed by Gibson assembly using the following fragments for *QF2*  
987 lines:

988 1) *pUC19* digested with XbaI and BamHI

989 2) Left and right homology arms: *Gr3* (left: 1.9 kb, right: 1.6 kb), *Ir25a* (left: 1.8 kb, right: 1.6  
990 kb), *Ir76b* (left: 1.2 kb, right: 2.2 kb), *Ir8a* (left: 1.7 kb, right: 1.7 kb), *Orco* (left: 1.2 kb, right: 1.3

991 kb) generated by polymerase chain reaction (PCR) using Liverpool genomic DNA as a  
992 template

993 3) A 2.6 kb fragment containing *T2A-QF2-SV40*, *3xP3-dsRed*, PCR-amplified from a  
994 previously assembled vector (*ppk10779-T2A-QF2-SV40*, *3xP3-dsRed*, Addgene accession  
995 #130667)

996 For Split-QF2 lines, donor plasmids were constructed by generating fragments using PCR from  
997 the indicated template with indicated primers in [Data File 1](#) and assembled using NEBuilder  
998 HiFi DNA Assembly (NEB E5520S):

999 *Ir25a-T2A-QFAD::Zip+-SV40-3xP3-eYFP-SV40* was composed of:

1000 1. Plasmid backbone with *Ir25* homology arms from *Ir25a-T2A-QF2* plasmid (6 kb)

1001 2. *T2A-QFAD::Zip+-SV40* sequence from (Riabinina et al., 2019), fragment synthesized by  
1002 Genewiz, sequence in [Data File 1](#) (1.5 kb)

1003 3. *3xP3-EYFP-SV40* from *pDSAY* (Addgene, #62291) (1.2 kb)

1004 *Orco-T2A-Zip--::QFDBD-SV40-3xP3-dsRED-SV40* was composed of:

1005 1. Plasmid backbone with *Orco* homology arms and *3xP3-dsRED-SV40* from *Orco-T2A-QF2*  
1006 plasmid (6.3 kb)

1007 2. *T2A-Zip--::QFDBD-SV40* synthesized by Genewiz, sequence in [Data File 1](#) (1.5 kb)

1008 For all QF2 and Split-QF2 constructs, the stop codon of the endogenous gene was removed  
1009 and the PAM sequences corresponding to the sgRNAs used for injection were modified by  
1010 PCR mutagenesis during Gibson assembly by introducing synonymous codon substitutions to  
1011 protect the sequence from Cas9 cleavage while retaining the amino acid identity. Plasmids  
1012 were isolated using an endotoxin-free plasmid midiprep kit (Macherey-Nagel) for QF2 lines and  
1013 NucleoBond Xtra Midi Endotoxin-Free plasmid kit (Clontech 740420.50) for Split-QF2 lines and  
1014 eluted in ultrapure water prior to injection. Donor plasmids are available at Addgene (accession  
1015 numbers #162520-162526). Approximately 2,000 wild-type Liverpool strain *Aedes aegypti*  
1016 embryos were injected with a mix containing recombinant Cas9 protein (PNA Bio, CP01) at  
1017 300 ng/μL, sgRNAs at 40 ng/μL and donor DNA plasmid (300 ng/μL for QF2 lines, 600 ng/μL  
1018 for Split-QF2 lines) at the Insect Transformation Facility at the University of Maryland Institute  
1019 for Bioscience & Biotechnology Research. Embryos were hatched and surviving G0 males and  
1020 females were crossed to wild-type Liverpool mosquitoes and their G1 offspring were screened  
1021 for fluorescence indicating positive stable germ line transformants. For QF2 lines, the fidelity of  
1022 insertion was verified by PCR and Sanger sequencing. One representative line for each  
1023 chemosensory receptor QF2 knock-in was selected for further study. QF2-driven expression  
1024 patterns were examined by crossing to *QUAS-CD8:GFP-3xP3-ECFP* and/or *QUAS-dTomato-*  
1025 *T2A-GCaMP6s-3xP3-ECFP*.

1026

1027 A technical problem arose in the construction of the *QUAS-dTomato-T2A-GCaMP6s-3xP3-*  
1028 *ECFP* plasmid that caused only a single copy of dTomato to be introduced into the mosquito,  
1029 rather than the brighter tandem dTomato or tdTomato that is more conventionally used.  
1030 Nevertheless we found that dTomato is sufficiently bright for our experiments (Shaner et al.,  
1031 2004).

1032

1033 All lines were outcrossed to wild-type Liverpool mosquitoes for at least 3 generations prior to  
1034 being used in experiments. For Split-QF2 lines, a single family with the correct insertion was  
1035 confirmed by PCR and Sanger sequencing for *Ir25a-QF2-AD* and *Orco-QF2-DBD*. To  
1036 propagate these lines, a male founder was chosen to cross to wild-type Liverpool females.  
1037 Animals were then back-crossed to Liverpool for at least 2 additional generations. To evaluate  
1038 if the Split-QF2 system was functional in *Aedes aegypti*, *Ir25a-QF2-AD* was crossed to *QUAS-*

1039 *dTomato-T2A-GCaMP6s*. The resulting *Ir25a-QF2-AD*, *QUAS-dTomato-T2A-GCaMP6s*  
1040 animals were then crossed to *Orco-QF2-DBD*. Expression of the *dTomato* reporter was  
1041 observed in larval antennae and subsequently confirmed in adult antennae and brains.  
1042

### 1043 **QUAS transgenic strains**

1044 *QUAS-CD8:GFP-3xP3-ECFP* and *QUAS-dTomato-T2A-GCaMP6s-3xP3-ECFP* transgenic  
1045 strains were described previously (Matthews et al., 2019). Two independent insertions of the  
1046 *QUAS-dTomato-T2A-GCaMP6s-3xP3-ECFP* reporter line (Jové et al., 2020; Matthews et al.,  
1047 2019) were used in this study. These are located on different chromosomes and were used  
1048 according to the crossing scheme needed for a given experiment. See [Data File 1](#) for details.  
1049

### 1050 **Chemosensory receptor mutant strains**

1051 The three chemosensory receptor mutant strains used in this study was previously described:  
1052 *Ir25a<sup>BamHI/BamHI</sup>* (De Obaldia et al., 2022), *Gr3<sup>4/4</sup>* (McMeniman et al., 2014), *Orco<sup>16/16</sup>*  
1053 (DeGennaro et al., 2013). *Gr3<sup>4/4</sup>* and *Orco<sup>16/16</sup>* were generated in the *Orlando* background  
1054 (here referred to as *+/+<sup>ORL</sup>*) and the *Ir25a<sup>BamHI/BamHI</sup>* mutant was generated in the *Liverpool*  
1055 background (here referred to as *+/+<sup>LVP</sup>*). To account for possible difference in genetic  
1056 background the *+/+<sup>ORL</sup>* strain was used as the controls in all experiments where the *Gr3<sup>4/4</sup>* and  
1057 *Orco<sup>16/16</sup>* mutants were used, and the *+/+<sup>LVP</sup>* strain was used as the control in experiments  
1058 where the *Ir25a<sup>BamHI/BamHI</sup>* mutant was used.  
1059

### 1060 **Transcript abundance estimates of *Aedes aegypti* OR, IR, and GR genes**

1061 Expression values for adult sugar-fed, non-blood-fed female sensory tissues were retrieved  
1062 from the *Aedes aegypti* L5 genome GitHub repository ([https://github.com/VosshallLab/AGWG-](https://github.com/VosshallLab/AGWG-AaegL5)  
1063 [AaegL5](https://github.com/VosshallLab/AGWG-AaegL5)) at this link: [https://github.com/VosshallLab/AGWG-](https://github.com/VosshallLab/AGWG-AaegL5/raw/master/AGWG%20AaegL5%20Chemoreceptor%20TPM.xlsx)  
1064 [AaegL5/raw/master/AGWG%20AaegL5%20Chemoreceptor%20TPM.xlsx](https://github.com/VosshallLab/AGWG-AaegL5/raw/master/AGWG%20AaegL5%20Chemoreceptor%20TPM.xlsx). These expression  
1065 values reflect libraries from a previous transcriptome study (Matthews et al., 2016) that had  
1066 been aligned to the *Aedes aegypti* genome (AaegL5) and chemosensory receptor geneset  
1067 annotation reported in units of Transcripts Per Million (TPM) (Matthews et al., 2018). The  
1068 number of genes from each of three gene families (ORs, IRs, and GRs) with expression values  
1069 above the indicated threshold were plotted in [Figure 1F,G](#) and are available in [Data File 1](#).  
1070

### 1071 **Whole brain fixation and immunostaining**

1072 Dissection of adult brains and immunostaining was done as previously described (Matthews et  
1073 al., 2019). 6-14 day-old mosquitoes were anesthetized on wet ice. Heads were carefully  
1074 removed from the body by pinching at the neck with sharp forceps. Heads were placed in a 1.5  
1075 mL tube for fixation with 4% paraformaldehyde, 0.1 M Millonig's Phosphate Buffer (pH 7.4),  
1076 0.25% Triton X-100, and nutated for 3 hr. Brains were then dissected out of the head capsule  
1077 in ice-cold  $\text{Ca}^{+2}$ -,  $\text{Mg}^{+2}$ -free phosphate buffered saline (PBS, Lonza 17-517Q) and transferred  
1078 to a 24-well plate. All subsequent steps were done on a low-speed orbital shaker. Brains were  
1079 washed in PBS containing 0.25% Triton X-100 (PBT) at room temperature 6 times for 15 min.  
1080 Brains were permeabilized with PBS, 4% Triton X-100, 2% normal goat serum (Jackson  
1081 ImmunoResearch #005-000-121) for ~48 hr (2 nights) at 4°C. Brains were rinsed once and  
1082 then washed with PBT at room temperature 6 times for 15 min. Primary antibodies were  
1083 diluted in PBS, 0.25% Triton X-100, 2% normal goat serum for ~48 hr (2 nights) at 4°C. Brains  
1084 were rinsed once then washed in PBT at room temperature 6 times for 15 min. Secondary  
1085 antibodies were diluted in PBS, 0.25% Triton X-100, 2% normal goat serum for ~48 hr (2  
1086 nights) at 4°C. Brains were rinsed once then washed in PBT at room temperature 6 times for

1087 15 min. Brains were equilibrated overnight in Vectashield (Vector Laboratories H-1000) and  
1088 were mounted in Vectashield. The following primary antibodies were used: anti-Brp/nc82  
1089 (mouse; 1:50, Developmental Studies Hybridoma Bank – see below) and/or anti-GFP (rabbit:  
1090 1:10,000; Life Technologies A-11122). The secondary antibodies used in all experiments  
1091 except **Figure S1** and **Figure S6** were anti-mouse-Cy5 (1:250; Life Technologies A-10524) and  
1092 anti-rabbit-Alexa Fluor 488 (1:500; Life Technologies A-11034). In **Figure S1**, the secondary  
1093 antibody was anti-mouse-Alexa Fluor 488 (1:500; Life Technologies A-11001) and in **Figure**  
1094 **S6**, the secondary antibodies were anti-mouse-Alexa Fluor 594 (1:500; Life Technologies A-  
1095 11005) and anti-rabbit-Alexa Fluor 488 (1:500; Life Technologies A-11034).

1096

### 1097 **Purification of nc82/Brp monoclonal antibody**

1098 Hybridoma cells expressing monoclonal antibody nc82 (Antibody Registry ID: AB\_2314866),  
1099 which recognizes the *Drosophila melanogaster* Brp protein (Wagh et al., 2006)  
1100 developed by Erich Buchner were obtained from the Developmental Studies Hybridoma Bank,  
1101 created by the NICHD of the NIH and maintained at The University of Iowa, Department of  
1102 Biology, Iowa City, IA 52242. Frances Weis-Garcia and the members of the MSKCC Antibody  
1103 and Bioresource Core Facility subsequently used these hybridoma cells to purify this  
1104 monoclonal antibody. The hybridoma was adapted to Gibco™ Hybridoma-SFM (Cat #  
1105 12045084) and 1% fetal bovine serum prescreened for ultra-low levels of bovine Ig. Antibody  
1106 expression was confirmed and the adapted hybridoma was inoculated into the cell  
1107 compartment of the Corning™ CELLine Disposable Bioreactor (Cat # 353137) in 15 ml of  
1108 Hybridoma-SFM + 0.5% fetal bovine serum (production media) at 3 million viable cells / ml.  
1109 The media compartment of the flask contained 350 ml of production media. The bioreactor was  
1110 incubated at 37°C with 7% CO<sub>2</sub> for 3 days, at which time the cells and media containing nc82  
1111 were harvested. 30 million viable cells from the harvest were re-inoculated back into the cell  
1112 compartment in 30 ml fresh production media. The media in the media compartment was  
1113 replaced the following day with 650 ml production media. Three days later, the media in the  
1114 media compartment was replaced with 1,000 ml production media, with the next harvest 3  
1115 days later (7 days after the previous harvest). Cells were harvested weekly and fed bi-weekly  
1116 until the desired amount of monoclonal antibody was reached. After the first harvest, each one  
1117 contained about 3 mg of monoclonal antibody nc82/ml production media. The harvests to be  
1118 purified were pooled, centrifuged at 12,855 x g for 15 min. 6.5 mg / run were loaded onto a  
1119 Cytiva (formerly GE Life Sciences) 1 ml HiTrap Protein G HP antibody purification column (Cat  
1120 # 29048581) at 1 ml / min. The column was then washed with 0.02 M Sodium Phosphate (pH  
1121 7.0) before the monoclonal antibody was eluted with 0.1 M Glycine-HCl (pH 2.7). One ml  
1122 fractions were collected and immediately neutralized with 60 ml of 1.0 M Tris-HCl (pH 9.0). The  
1123 harvest, flow through and fractions from the peak were run on an a 10% SDS-PAGE (Bio-Rad  
1124 Cat # 345-0010) to confirm purity and determine which should be pooled. The pooled fractions  
1125 of monoclonal antibody were dialyzed into PBS overnight using dialysis tubing (Spectrum™  
1126 132544) with a 50 kDa MWCO. Another 10% SDS-PAGE was run, and the concentration  
1127 determined using the absorbance at 280 using an extinction coefficient of 1.43.

1128

### 1129 **Generation of the IR25a polyclonal antibody**

1130 Rabbit polyclonal antibodies were raised against IR25a by Proteintech Group Inc. Antibodies  
1131 were raised against a protein fusion of the 67 C-terminal amino acids of IR25a and glutathione  
1132 S-transferase. cDNA corresponding to the C-terminal region was inserted into the expression  
1133 vector PGEX-4T using primers TTTTGGATCCAAATACCGCAAGAACGTAAAG and  
1134 TTTTCTCGAGTTAGAAACGAGATTTAAAGTTG and expressed in bacterial strain BL21. A

1135 purified 31 kDa fusion protein was used to immunize 2 rabbits. Serum was affinity purified to a  
1136 final concentration of 450 µg/mL and tested by whole mount antenna immunostaining  
1137 comparing  $+/+^{LVP}$  to  $IR25a^{BamHI/BamHI}$ . Antibodies from one of the two rabbits were found to  
1138 selectively label  $+/+^{LVP}$  antennae, and only this antibody was used in all further studies.  
1139

1139

### 1140 **Female Antennal lobe confocal imaging**

1141 All brains were imaged using a Zeiss Inverted LSM 880 laser scanning confocal microscope  
1142 with a 25x / 0.8 NA immersion-corrected objective unless otherwise noted. Glycerol was used  
1143 as the immersion medium to most closely match the refractive index of the mounting medium  
1144 Vectashield. Antennal lobes in [Figure 1](#), [Figure 2](#), [Figure 6](#), [Figure S2-S8](#) were imaged at  
1145 either 1024 x 1024 or 2048 x 2048 pixel resolution in X and Y with 0.5 µm Z-steps for a final  
1146 voxel size of either 0.0615 x 0.0615 x 0.5 µm<sup>3</sup> or 0.1230 x 0.1230 x 0.5 µm<sup>3</sup>. Both conditions  
1147 oversampled relative to the objective resolution and no differences were noted between  
1148 imaging conditions. The laser intensity and gain were adjusted along the Z-axis to account for  
1149 a loss of intensity due to depth and care was taken to avoid saturation and ensure that the  
1150 deepest glomeruli were visible for segmentation. We note that all confocal imaging was  
1151 conducted in a manner that would maximize our ability to visualize the boundaries between  
1152 glomeruli and to determine the presence or absence of a given fluorophore in each  
1153 glomerulus, and was not intended as a quantitative measure of fluorescence intensity.  $3xP3$   
1154 was used as a promoter to express fluorescent proteins as markers for the knock-ins and  
1155 *QUAS* transgenes used in this study, and care was taken to distinguish expression derived  
1156 from the  $3XP3$  promoter from the expression of the QF2 driver and *QUAS* effector lines under  
1157 investigation.  $3xP3$  drives expression in the optic lobes, as well as some cells in the dorsal  
1158 brain. Neither area overlaps with the antennal lobes. As reported previously (Matthews et al.,  
1159 2019), we saw no  $3xP3$ -driven expression in the antennal lobes in the reporter lines alone  
1160 (data not shown). Representative antennal lobe images presented in the figures were cropped  
1161 to remove  $3xP3$ -driven expression elsewhere in the brain.  
1162

1162

### 1163 **Male brain confocal imaging**

1164 All male brains ([Figure 2M,O,Q,S,U](#)) were imaged using a Zeiss Inverted LSM 880 laser  
1165 scanning confocal microscope with a 25x / 0.8 NA immersion-corrected objective. Glycerol was  
1166 used as the immersion medium to most closely match the refractive index of the mounting  
1167 medium Vectashield. Brains were imaged at 1024 x 1024 pixel resolution in X and Y with 0.5  
1168 µm Z-steps for a final voxel size of 0.2372 x 0.2372 x 0.5 µm<sup>3</sup>. The laser intensity and gain  
1169 were adjusted along the Z-axis to account for a loss of intensity due to depth and care was  
1170 taken to avoid saturation and ensure that the deepest regions of the brain were visible.  
1171 Confocal images of the brain were processed in ImageJ/FIJI (NIH).  
1172

1172

### 1173 **Female subesophageal zone confocal imaging**

1174 All female subesophageal zones ([Figure 3B,D](#)) were imaged using a Zeiss Inverted LSM 880  
1175 laser scanning confocal microscope with a 25x / 0.8 NA immersion-corrected objective.  
1176 Glycerol was used as the immersion medium to most closely match the refractive index of the  
1177 mounting medium Vectashield. Brains were imaged at 1024 x 1024 pixel resolution in X and Y  
1178 with 0.5 µm Z-steps for a final voxel size of 0.2076 x 0.2076 x 0.5 µm<sup>3</sup>. The laser intensity and  
1179 gain were adjusted along the Z-axis to account for a loss of intensity due to depth and care  
1180 was taken to avoid saturation and ensure that the deepest regions of the subesophageal zone  
1181 were visible. Confocal images of the subesophageal zone were processed in ImageJ/FIJI  
1182 (NIH).

1182

## 1183 **Antennal lobe glomerulus quantification**

1184 Confocal images of the antennal lobes in [Figure 1](#), [Figure 2](#), [Figure 6](#), [Figure S2-S8](#) were  
1185 processed in ImageJ/FIJI (NIH). The number of glomeruli was quantified as follows: a single  
1186 region of interest (ROI) was manually drawn around each glomerulus at a section  
1187 approximately central along the Z-axis. Every glomerulus was outlined and an ROI set was  
1188 collected that contained the outlines of all glomeruli. Glomeruli were then separated into two  
1189 groups, GFP-positive and GFP-negative glomeruli. A count of each was made to determine the  
1190 number of glomeruli labeled by each line as well as the total number of glomeruli. The ROIs  
1191 were flattened along the Z-axis to enable representation of the data in two dimensions in  
1192 [Figure 1](#), [Figure 2](#), [Figure S2-S5](#), [Figure S7](#). The left antennal lobe in 3 brains was analyzed  
1193 for each genotype in [Figure 1](#) except for *Gr3*, for which the left antennal lobe was analyzed in 1  
1194 brain, and both left and right antennal lobes were analyzed in an additional 4 brains in [Figure](#)  
1195 [S6](#). Although we were able to recognize general regions of the antennal lobe, the  
1196 interindividual variability made it impossible to identify most glomeruli by shape alone. We  
1197 therefore have not attempted to name and number every glomerulus in *Aedes aegypti* as has  
1198 been done in previous studies (Ignell et al., 2005; Shankar and McMeniman, 2020). As noted  
1199 by Ito et al. (Ito et al., 2014), there is considerable confusion about the use of coordinate axes  
1200 in the brains of animals in general and insects in particular. The glomeruli in the antennal lobe  
1201 of *Aedes aegypti* were originally named by Ignell et al. (Ignell et al., 2005) using a set of  
1202 coordinate axes that differ from those consistently used in *Drosophila melanogaster* (Couto et  
1203 al., 2005; Fishilevich and Vosshall, 2005; Grabe et al., 2015; Laissue et al., 1999; Stocker et  
1204 al., 1990). A recent study of the antennal lobe of *Aedes aegypti* renamed glomeruli to account  
1205 for this discrepancy in coordinate axes (Shankar and McMeniman, 2020), and throughout this  
1206 paper we use the same coordinate axes they have implemented. While Shankar and  
1207 McMeniman renamed most antennal lobe regions and glomeruli, they chose not to rename the  
1208 MD (Medio-Dorsal) cluster of glomeruli comprising MD1, MD2, and MD3 whose sensory input  
1209 derives from the maxillary palp. We have observed in our study that the MD glomeruli are  
1210 medial, but they are not notably dorsal, and therefore refer to them as Glomerulus 1,  
1211 Glomerulus 2, and Glomerulus 3 in this paper for simplicity. While there is utility in naming  
1212 glomeruli, we suspect that the *Aedes aegypti* mosquito antennal lobe atlas will be refined in the  
1213 future with the advent of new genetic tools that will unambiguously allow the field to distinguish  
1214 and name genetically identifiable glomeruli. We found that the size, shape, and number of  
1215 antennal lobe glomeruli in *Aedes aegypti* was variable from animal to animal. It is possible that  
1216 the boundaries between glomeruli are not easily distinguished by synaptic staining and that  
1217 specific glomeruli will become identifiable once there are genetic tools available that label  
1218 smaller populations of olfactory sensory neurons. The anatomical variability we see is  
1219 consistent with both the original map that identified 50 glomeruli (Ignell et al., 2005), which  
1220 divided glomeruli into 3 classes based on their variability in location, as well as a recent study  
1221 that looked specifically at the size and shape of glomeruli across animals (Shankar and  
1222 McMeniman, 2020) and revised the original map to a count of ~80 glomeruli. Shankar and  
1223 McMeniman named and numbered these glomeruli across animals, but they noted that they  
1224 were only able to consistently identify 63 glomeruli. This is similar to the ~65 glomeruli we  
1225 observed in our work. While there is not yet a clear consensus on the exact number of  
1226 antennal lobe glomeruli in *Aedes aegypti*, the number of chemosensory receptors expressed in  
1227 the antenna and maxillary palp is at least twice as large as any of the estimates of glomerulus  
1228 number. The variability in antennal lobe structure appears at first to contrast with *Drosophila*  
1229 *melanogaster*, where each glomerulus can be clearly identified and named. However, we note  
1230 that the antennal lobe map in *Drosophila melanogaster* has been refined with the advent of

1231 new genetic techniques, starting with 35 glomeruli in the original atlas (Stocker et al., 1990),  
1232 then modified to 40 glomeruli (Laissue et al., 1999), and further refined in numerous studies  
1233 (Couto et al., 2005; Fishilevich and Vosshall, 2005; Tanaka et al., 2012) including a recent  
1234 count of 54 (Grabe et al., 2015) and 58 (Task et al., 2021) glomeruli. We have refrained from  
1235 naming glomeruli in *Aedes aegypti* at this time because we believe that a more stereotyped  
1236 arrangement will emerge as new genetic lines are generated that allow cell-type-specific  
1237 labelling. A recent study in the mosquito *Anopheles gambiae* using mosquitoes that label *Orco*-  
1238 expressing olfactory neurons also noted that the antennal lobe was variable between animals  
1239 relative to *Drosophila melanogaster* (Riabinina et al., 2016). It is therefore possible that  
1240 mosquito antennal lobes are more variable than Drosophilids (Grabe et al., 2015; Prieto-  
1241 Godino et al., 2017). Variability in olfactory bulb structure is seen even in the mouse, *Mus*  
1242 *musculus*, where the principles of olfactory organization were first established (Schaefer et al.,  
1243 2001; Strotmann et al., 2000; Zou et al., 2009). The exact size and location of glomeruli can  
1244 vary between animals more than initially appreciated and appears to be determined by both  
1245 genetic factors and activity in olfactory sensory neurons during the early life of the animal. In  
1246 *Drosophila melanogaster*, glomerulus size is highly genetically determined and correlates  
1247 strongly with the number of olfactory sensory neurons that innervates each glomerulus (Grabe  
1248 et al., 2015). Whether the variability in glomerulus size in the mosquito is due to activity-  
1249 dependent changes in structure or other factors remains to be seen.

1250

#### 1251 **Additional technical notes on expression and projection patterns of chemosensory** 1252 **receptor knock-in strains**

1253 *Orco-QF2>QUAS-mCD8:GFP*: We noted that the intensity of GFP varies between glomeruli in  
1254 this driver line, with some bright and others comparably dim. We speculate that this is due to a  
1255 combination of the variability in *Orco* expression levels in individual neurons and variability in  
1256 the density of innervation in individual glomeruli. A large region of the anterior ventral antennal  
1257 lobe was previously referred to as the Johnston's organ center and was thought to comprise a  
1258 single large glomerulus (Ignell et al., 2005). In other insect species, Johnston's organ mediates  
1259 detection of auditory cues. Consistent with a recent study (Shankar and McMeniman, 2020),  
1260 we segmented this region into multiple glomeruli based on anatomical boundaries revealed  
1261 with Brp immunofluorescence. Glomeruli in this region are innervated by *Orco*-expressing  
1262 neurons, calling into doubt the original report that these glomeruli process auditory stimuli and  
1263 suggesting instead that they serve an olfactory function. In support of this hypothesis, the  
1264 analogous area of the *Anopheles coluzzii* antennal lobe has been shown to receive projections  
1265 from *Orco*-expressing olfactory sensory neurons (Riabinina et al., 2016). We also observed  
1266 GFP projections into the subesophageal zone in *Orco-QF2>QUAS-mCD8:GFP* animals, which  
1267 appear to derive from expression in the proboscis, the primary taste organ in insects. This is  
1268 consistent with similar expression in *Anopheles coluzzii* (Riabinina et al., 2016) and functional  
1269 data in *Anopheles gambiae* showing that olfactory responses are detected in this gustatory  
1270 organ (Kwon et al., 2006).

1271

1272 *Ir25a-QF2>QUAS-mCD8:GFP*: The intensity of GFP projections varies between glomeruli in  
1273 this driver line, with some bright and other comparably dim, as noted for *Orco-QF2*. The  
1274 brightest glomeruli are primarily medial and anterior. We see the dimmest innervation in the  
1275 area previously described as Johnston's organ center as well as in the central antennal lobe.  
1276 Labeling was also seen in other areas of the brain, most notably the subesophageal zone and  
1277 anterior mechanosensory motor center.

1278

1279 *Ir8a-QF2>QUAS-mCD8:GFP*: Depending on the brain being analyzed there were either 2 or 3  
1280 medial glomeruli labelled in this line. In the cases where there were 3 medial glomeruli, this  
1281 third medial glomerulus was innervated by a few large-diameter axons. These were larger and  
1282 sparser than the smaller axons that densely innervated most other glomeruli in this line. We  
1283 also note that there are 2-3 cell bodies that express GFP located in the cell body rind lateral to  
1284 the antennal lobe (rALI). We are unable to definitively describe where these cells project  
1285 without genetic reagents that selectively label these cells, but they appear to send bilateral  
1286 processes that cross the midline within what appears to be the saddle to innervate the anterior  
1287 mechanosensory motor center outside the antennal lobe. All naming is in accordance with the  
1288 new insect brain nomenclature presented in Ito et al. (Ito et al., 2014).

1289  
1290 *Ir76b-QF2>QUAS-mCD8:GFP*: In addition to projections to the antennal lobe, this line shows  
1291 innervation of the subesophageal zone of the brain.

1292  
1293 *Gr3-QF2>QUAS-mCD8:GFP*: All antennal lobes in this line show innervation of a single  
1294 glomerulus (also referred to as "MD1" and here referred to as "Glomerulus 1"; (Ignell et al.,  
1295 2005; Shankar and McMeniman, 2020). In several brains, we saw a second small medial  
1296 glomerulus that derives its innervation from the antenna and is in a small medial cluster of  
1297 landmark glomeruli midway down the anterior-posterior axis closest to the center of the brain.  
1298 Innervation appears to come from only a few axons. This low and variable reporter expression  
1299 is consistent with the low level of expression of *Gr3* in the antennal transcriptome (Matthews et  
1300 al., 2016). Because this line only shows innervation of these 1-2 glomeruli, we analyzed all  
1301 glomeruli only in the single brain in [Figure 11](#), and additionally analyzed 8 more antennal lobes  
1302 in 4 brains for the presence or absence of labelling in these two glomeruli. We analyzed both  
1303 left and right antennal lobes from 4 brains and found that in 3 of the 4 brains there was a  
1304 second glomerulus in one or both antennal lobes ([Figure S6](#)). The presence of the second  
1305 glomerulus was not specific within a single animal as we found all variations of presence and  
1306 absence of this glomerulus across both antennal lobes in these 4 animals. In some *Gr3-*  
1307 *QF2>QUAS-mCD8:GFP* animals, we detected a small number of processes that extended  
1308 beyond the antennal lobe and into the higher brain, although the exact termination site varied.  
1309 We never saw CO<sub>2</sub>-evoked activity in the variable second glomerulus or these projections  
1310 outside the antennal lobe. Images in [Figure S6](#) were taken as described above with the  
1311 following changes: Secondary antibodies used were anti-mouse-Alexa Fluor 594 (1:500; Life  
1312 Technologies A-11005) and anti-Rabbit-Alexa Fluor 488 (1:500; Life Technologies A-11034).  
1313 Images were taken using a Zeiss Inverted LSM 880 laser scanning confocal microscope with a  
1314 Plan-Apochromat 40x/1.4 Oil DIC objective. Images were taken at 1024 x 1024 in XY to  
1315 generate images with a final voxel size of 0.1384 x 0.1384 x 0.5 μm<sup>3</sup>. Images were scored as  
1316 containing GFP in one or two glomeruli.

1317  
1318 **Additional technical notes on expression and projection patterns of Split-QF2 strains**  
1319 All antennal lobe immunostaining in [Figure 2](#), [Figure 6](#), [Figure S7](#), [Figure S8](#) was carried out  
1320 as described above with slight modifications to utilize the *15xQUAS-dTomato-T2A-GCaMP6s*  
1321 effector line. The same primary antibodies were used because of the structural similarity  
1322 between GCaMP6s and GFP. Intrinsic dTomato was detected without antibody amplification,  
1323 as it retained fluorescence after fixation and staining. Brp (Cy5), dTomato, and GCaMP6s  
1324 (Alexa Fluor 488) were imaged as three separate confocal channels as described above.  
1325 Glomeruli labelled by dTomato completely overlapped with those labelled by GCaMP6s  
1326 immunofluorescence, so both channels were used during the quantification of positive and



1327 negative glomeruli. dTomato labeling was used to generate sample images. There was no  
1328 staining in the antennal lobes of the individual split effector lines crossed to *15xQUAS-*  
1329 *dTomato-T2A-GCaMP6s* (n=3 per genotype) (Figure 2, Figure S7).  
1330

### 1331 **Antennal lobe anterograde dye fill**

1332 For images in Figure S1, mosquitoes were anesthetized on wet ice until immobile and then  
1333 transferred to a cold dissection dish. A single antenna or maxillary palp was loaded with  
1334 Texas-red conjugated dextran (Molecular Probes D3328) diluted 10 mg in 100  $\mu$ L external  
1335 saline (103 mM NaCl, 3 mM KCl, 5 mM 2-[Tris(hydroxymethyl)methyl]-2-aminoethanesulfonic  
1336 acid (TES), 1.5 mM CaCl<sub>2</sub>, 4 mM MgCl<sub>2</sub>, 26 mM NaHCO<sub>3</sub>, 1 mM NaH<sub>2</sub>PO<sub>4</sub>, 10 mM trehalose,  
1337 10 mM glucose, pH 7.3, osmolality adjusted to 275 mOsm/kg). To load the dye a small drop  
1338 (approximately 0.5-1  $\mu$ L) of dye was placed onto the surface of the dish and the animal was  
1339 moved such that the intended cut-site on a single antenna or maxillary palp was placed in the  
1340 drop of dye. The antenna or maxillary palp was then removed with sharp forceps and a fine  
1341 scalpel (F.S.T 10315-12) while it was submerged in the dye. Care was taken to remove the  
1342 maxillary palp proximal to the fourth segment, to include all the capitata-peg sensilla, and to  
1343 remove the antenna near the base but to leave the antennal pedicel completely intact. The  
1344 animal remained immobile on ice with the antenna or maxillary palp submerged and the dye  
1345 was loaded for 2-5 min. After this time the animal was placed in a small soup cup with access  
1346 to 10% sucrose and returned to standard rearing conditions overnight to give the dye time to  
1347 diffuse throughout the neurons and fill the length of the axon. The next morning dissection of  
1348 adult brains and immunostaining was carried out as described above.  
1349

### 1350 **Antennal lobe 3-D reconstructions**

1351 In an attempt to develop a map of the *Aedes aegypti* antennal lobe, 3 brains from the *+/+<sup>LVP</sup>*  
1352 strain were immunolabeled with Brp to identify the boundaries between antennal lobe  
1353 glomeruli. The left antennal lobe in each brain was independently reconstructed from confocal  
1354 sections taken with a Plan-Apochromat 63x/1.40NA oil immersion objective, at 1024 x 1024  
1355 pixel resolution in X and Y with 0.5  $\mu$ m Z-steps for a final voxel size of either 0.1318 x 0.1318 x  
1356 0.5  $\mu$ m<sup>3</sup> using the software Imaris (Bitplane). Although the area previously termed Johnston's  
1357 organ center was considered a single glomerulus in a previous study (Ignell et al., 2005), we  
1358 noted anatomical boundaries in this region, suggesting that it contains multiple glomeruli. This  
1359 observation is consistent with recently published work (Shankar and McMeniman, 2020) and  
1360 this area was segmented by an individual researcher to generate the final reconstructions. Two  
1361 of these are shown in Figure S1. Each glomerulus was manually segmented into an individual  
1362 surface using Surpass View. We were consistently able to identify the three glomeruli  
1363 innervated by the maxillary palp, previously termed MD1, MD2 and MD3 (Ignell et al., 2005)  
1364 which we refer to in this study as Glomerulus 1, Glomerulus 2, and Glomerulus 3 (Figure 1,  
1365 Figure 6). The overall structure of the antennal lobe varied considerably from animal to animal  
1366 and although we were able to identify certain regions and certain landmark glomeruli including  
1367 those that are targeted by the maxillary palp, we were unable to assign an unambiguous  
1368 identity to every glomerulus, as is possible in *Drosophila melanogaster* (Couto et al., 2005;  
1369 Fishilevich and Vosshall, 2005). This variability makes it essentially impossible to identify a  
1370 given glomerulus between animals and we therefore have decided to avoid referring to  
1371 glomeruli by previous naming schemes, including MD1, MD2, MD3. An authoritative atlas of  
1372 the *Aedes aegypti* antennal lobe awaits genetic reagents that label subpopulations of sensory  
1373 neurons that will permit the field to refer to glomeruli by their molecular identity.  
1374

## 1375 **Antennal whole mount immunofluorescence**

1376 Whole-mount immunostaining of adult antennae was performed as described (Riabinina et al.,  
1377 2016) with modifications. 7-11 day-old Liverpool mosquitoes were immobilized on ice,  
1378 decapitated and heads and placed in 1 mL ZnFA fixative solution (0.25% ZnCl<sub>2</sub>, 2%  
1379 paraformaldehyde, 135 mM NaCl, 1.2% sucrose and 0.03% Triton X-100) for 20–24 h at room  
1380 temperature in the dark. Next, the heads were washed three times for 30 min each with HBS  
1381 buffer (150 mM NaCl, 5 mM KCl, 25 mM sucrose, 10 mM HEPES, 5 mM CaCl<sub>2</sub> and 0.03%  
1382 Triton X-100). Antennae were carefully removed in HBS on ice and placed in 400 µL HBS in  
1383 0.5 mL Eppendorf tubes. After a brief wash in HBS, the tissue was incubated in 400 µL 80%  
1384 methanol/20% dimethyl sulfoxide (DMSO) solution for 1 hr at room temperature, washed for  
1385 5 min in 400 µL 0.1 M Tris pH 7.4, 0.03% Triton X-100 solution and incubated in 400 µL  
1386 blocking solution (PBS, 5% normal goat serum (Jackson 005-000-121), 1% DMSO and 0.3%  
1387 Triton X-100) for at least 3 hr at room temperature or overnight at 4°C. Next, the tissue was  
1388 placed in a 0.5 mL Eppendorf tubes containing 400 µL blocking solution with primary  
1389 antibodies [rabbit anti-Orco EC2 (Larsson et al., 2004), 1:50, Vosshall lab; chicken anti-  
1390 GFP, 1:200, Aves GFP-1020] and submerged and held in a water bath sonicator (Branson  
1391 m1800) for 30 sec at the high setting. Next, the tubes were placed on a rotator for 2 days at  
1392 4°C in the dark, after which the sonication procedure was repeated. The tubes were placed on  
1393 a rotator for 2 additional days (for a total of 4 days) at 4°C in the dark. Next, the tissue was  
1394 washed 5X 30 min each at room temperature in PBS, 1% DMSO and 0.3% Triton X-100.  
1395 Secondary antibodies (anti-rabbit Alexa Fluor 555 Plus, 1:200, Thermo Fisher A-32732, anti-  
1396 chicken Alexa Fluor 488, 1:200, Thermo Fisher A-11039) and nuclear dye (TO-PRO-3 Iodide,  
1397 1:400, Thermo Fisher T3605) were added to the blocking solution, and tubes were sonicated  
1398 as described above and incubated for 4 days at 4°C in the dark with the sonication repeated  
1399 after 2 days of incubation. The tissue was then washed 5X 30 min at room temperature in  
1400 PBS, 1% DMSO and 0.3% Triton X-100, rinsed in PBS and mounted in Slow Fade Diamond  
1401 for confocal imaging.

## 1402 1403 **Antennal whole-mount immunostaining with Ir25a antibody**

1404 This protocol was performed as previously described (Basrur et al., 2020) with modifications.  
1405 Six- to 11-day-old female mosquitoes were anesthetized on wet ice, decapitated, and placed in  
1406 1.5 mL 5 U/mL chitinase (Sigma C6137) and 100 U/mL chymotrypsin (Sigma CHY5S) in 119  
1407 mM NaCl, 48 mM KCl, 2 mM CaCl<sub>2</sub>, 2 mM MgCl<sub>2</sub>, 25 mM HEPES, 1% DMSO buffer on ice.  
1408 Heads were incubated on a ThermoMixer (Eppendorf 5382000023) at 37°C for 5 min, followed  
1409 by 55 min in a rotating hybridization oven at 37°C. Heads were then rinsed once and fixed in  
1410 4% paraformaldehyde, 1X Ca<sup>+2</sup>, Mg<sup>+2</sup> free PBS, and 0.03% Triton X-100 for 24 hr at 4°C on  
1411 a rotator. All subsequent 4°C steps used a nutator, and room temperature steps used a rotator.  
1412 Heads were washed for 30 min at room temperature at least three times in 1X PBS with 0.03%  
1413 Triton X-100 (0.03% PBT). Antennae were then dissected into 0.5-mL microfuge tubes and  
1414 dehydrated in 80% methanol/20% DMSO for 1 hr at room temperature. Antennae were  
1415 washed in 0.03% PBT for 30 min at room temperature, and blocked/permeabilized in 1X PBS,  
1416 1% DMSO (Sigma 472301), 5% normal goat serum, 4% Triton X-100 for 24 hr at 4°C.  
1417 Antennae were washed for 30 min at least five times with 0.03% PBT, 1% DMSO, 5% normal  
1418 goat serum at 4°C, and then moved to primary antibody in 1X PBS, 1% DMSO, 5% normal  
1419 goat serum, 0.03% Triton X-100 for 72 hr at 4°C. Primary antibodies used were mouse anti-  
1420 *Apocrypta bakeri* Orco monoclonal antibody #15B2 (1:50 dilution, gift of Joel Butterwick and  
1421 Vanessa Ruta), and rabbit anti-Ir25a (1:50 dilution). Orco monoclonal antibody and Ir25a  
1422 polyclonal antibody specificities were verified in *Aedes aegypti* by staining *orco* mutant and

1423 *Ir25a* mutant antennae, respectively (Figure 4E-H). Antennae were washed for 30 min at least  
1424 five times with 0.03% PBT, 1% DMSO at room temperature, and then washed overnight in the  
1425 same solution. Antennae were then moved to secondary antibody (1:200) in 1X PBS, 1%  
1426 DMSO, 5% normal goat serum, 0.03% Triton X-100 for 72 hr at 4°C. Secondary antibodies  
1427 used were goat anti-mouse Alexa Fluor 488 (Thermo A-11001) and goat anti-rabbit Alexa  
1428 Fluor 555 Plus (Thermo A32732). Antennae were washed for 30 min at least five times with  
1429 0.03% PBT, 1% DMSO at room temperature, and then washed overnight in the same solution.  
1430 Antennae were rinsed in 1X PBS, rinsed three times in Slowfade Diamond (Thermo S36972),  
1431 and mounted in Slowfade Diamond.

1432

### 1433 **Whole mount antennal and maxillary palp RNA *in situ* hybridization**

1434 RNA was detected in whole mount antenna and maxillary palp using the hybridization chain  
1435 reaction (HCR) technique as previously described (Choi et al., 2018) with modifications.  
1436 Probes, amplifiers, Probe Hybridization Buffer, Amplification Buffer, and Probe Wash Buffer  
1437 were purchased from Molecular Instruments. Full list of probe lot numbers can be found in  
1438 [Data File 1](#). 5-8 day-old Liverpool mosquitoes were anesthetized on wet ice, manually  
1439 decapitated with forceps, and heads with antennae and the proboscis were digested in a  
1440 chitinase-chymotrypsin solution (119 mM NaCl, 48 mM KCl, 2 mM CaCl<sub>2</sub>, 2 mM MgCl<sub>2</sub>, 25 mM  
1441 HEPES, 5 U/mL chitinase (Sigma-Aldrich C6137-50UN), 100 U/mL alpha-chymotrypsin  
1442 (Sigma-Aldrich CHY5S-10VL), 2% DMSO) (Manning and Doe, 2017) at 37°C for 30 min  
1443 (antennae) or 1 hr (maxillary palps) in a Fisher Isotemp oven and subsequently fixed in 4%  
1444 paraformaldehyde, 1X PBS, 0.03% Triton X-100 on a rotator at 4°C overnight. Heads were  
1445 washed 4 times on ice for 10 min each in 0.1% PBS-Tween-20. Antennae or maxillary palps  
1446 were dissected in 0.1% PBS-Tween-20 on ice and dehydrated with a graded series of  
1447 methanol/0.1% PBS-Tween: 25% methanol in 0.1% PBS-Tween-20 for 10 min on ice, 50%  
1448 methanol in 0.1% PBS-Tween-20 for 10 min on ice, 75% methanol in 0.1% PBS-Tween-20 for  
1449 10 min on ice, and two washes of 100% methanol for 10 min on ice. Tissues were incubated  
1450 overnight in 100% methanol at -20°C and were subsequently rehydrated with a series of  
1451 graded methanol/0.1% PBS-Tween-20: 75% methanol in 0.1% PBS-Tween-20 for 10 min on  
1452 ice, 50% methanol in 0.1% PBS-Tween-20 for 10 min on ice, 25% methanol in 0.1% PBS-  
1453 Tween-20 for 10 min on ice, and two washes of 0.1% PBS-Tween-20 for 10 min each on ice.  
1454 Tissue was digested in 20 µg/mL Proteinase-K (Thermo Fisher AM2548) in 0.1% PBS-Tween  
1455 for 30 min at room temperature and washed twice with 0.1% PBS-Tween-20 for 10 min each at  
1456 room temperature. Tissue was fixed in 4% paraformaldehyde in 0.1% PBS-Tween-20 for 20  
1457 min at room temperature and washed 3 times for 10 min each in 0.1% PBS-Tween-20 at room  
1458 temperature. Tissue was incubated in Probe Hybridization Buffer at room temperature for 5  
1459 min and then in 37°C pre-warmed Probe Hybridization Buffer rotating in a hybridization oven  
1460 for 30 min. 8 pmol of each probe set was prepared in 37°C pre-warmed Probe Hybridization  
1461 Buffer and tissue was incubated in probe solution at 37°C in a hybridization oven for 2 nights.  
1462 Tissues were washed in 37°C pre-warmed Probe Wash Buffer 5 times for 10 min each at  
1463 37°C. Tissues were washed twice in 5X SSC 0.1% Tween-20 at room temperature for 10 min  
1464 each. Tissues were pre-amplified in room temperature Amplification Buffer for 10 min. 18 pmol  
1465 hairpins were separately prepared by heating 6 µL of 3 µM stock of hairpins H1 and H2 at  
1466 95°C for 90 sec on an Eppendorf Mastercycler and allowing to cool to room temperature in a  
1467 dark drawer for 30 min. Hairpins were resuspended in 100 µL amplification buffer and tissues  
1468 were incubated in this hairpin solution in the dark on a rotator at room temperature overnight.  
1469 Tissues were washed 5 times for 10 min each in 5X SSC 0.1% Tween-20 and mounted in

1470 SlowFade Diamond (Thermo Fisher S36972) on glass slides with coverslips for confocal  
1471 imaging.

1472

### 1473 **Whole mount antennal, maxillary palp, and proboscis dTomato visualization**

1474 7-14 day-old *Ir25a-QF2*, *Orco-QF2*, *Ir25a-QF2AD*, *Orco-QFDBD*, and *Ir25a-QF2AD Orco-*  
1475 *QFDBD>15XQUAS-dTomato-T2A-GCaMP6s* mosquitoes were anesthetized on wet ice,  
1476 manually decapitated with forceps and heads with antennae, proboscises, and maxillary palps  
1477 were immediately fixed in 1 mL 4% paraformaldehyde, 1X PBS, 0.03% Triton X-100, on a  
1478 rotator in the dark at 4°C overnight. Heads were washed 3X 30 min each in 1X PBS, 0.03%  
1479 Triton X-100 at room temperature, then antennae, proboscises, and maxillary palps were  
1480 carefully removed and placed in 1X PBS, 0.03% Triton X-100. Next, antennae, proboscises,  
1481 and maxillary palps were placed in a solution of 1X PBS, 0.03% Triton X-100, 1% DMSO, and  
1482 a 1:400 dilution of TO-PRO-3 (Thermo Fisher T3605) for 24 hr at 4°C in the dark. Antennae,  
1483 proboscises, and maxillary palps were then washed 5X 30 min each in 1X PBS, 0.03% Triton  
1484 X-100 at room temperature in the dark, washed once with 1X PBS, transferred to a well of  
1485 SlowFade diamond to remove excess PBS, and mounted in SlowFade Diamond for confocal  
1486 imaging.

1487

### 1488 **Antennal and maxillary palp confocal imaging and cell quantification**

1489 Images of peripheral tissues were acquired with a Zeiss Axio Observer Z1 Inverted LSM 880  
1490 NLO laser scanning confocal microscope (Zeiss) with a 25x/0.8 NA or 63x/1.4 NA immersion-  
1491 corrected objective at a resolution of 3096 x 3096 pixels or 2048 x 2048 pixels. When  
1492 comparing dTomato fluorescence across genotypes, image acquisition parameters were kept  
1493 consistent. When necessary, tiled images were stitched with 20% overlap. We note that all  
1494 confocal imaging was conducted in a manner that would maximize our ability to visualize the  
1495 presence or absence of each fluorophore and was not intended as a quantitative measure of  
1496 fluorescence intensity. Confocal images were processed in ImageJ (NIH). Because the  
1497 antenna is a cylindrical structure, when whole antennal segments are mounted on a slide and  
1498 imaged on a confocal microscope, signal can be easily detected from the region closest to the  
1499 coverslip and confocal objective, but signal is weaker when imaging the side further from the  
1500 coverslip and objective. For the purposes of consistent quantification, we only quantified cell  
1501 numbers from the region closest to the coverslip (red rectangle in [Figure S12A](#)). For  
1502 quantifying expression in the maxillary palp, only the dorso-lateral region of the 4<sup>th</sup> maxillary  
1503 palp segment was analyzed. (yellow rectangle in [Figure S12B](#)). Quantification of co-expression  
1504 in antennae and maxillary palps was done in ImageJ (NIH) using the Cell Counter plugin. Cells  
1505 in each channel were manually marked independently of the signal in the other channels. After  
1506 cells in each channel are marked, and markers were then merged. Cells that were labeled with  
1507 multiple markers (co-expressing cells) were then marked with a third marker ([Figure S12C-H](#)).  
1508 Cell counts were then imported into Microsoft Excel and R for analysis.

1509

### 1510 **Antenna Dissection for snRNA-seq**

1511 Approximately 100-250 female *+/+<sup>LVP</sup>* mosquitoes aged 6-8 days post-eclosion were  
1512 anesthetized on wet ice for 10 min. Mosquitoes were then placed in a 70 µm cell strainer  
1513 (Falcon 08-771-1). The cell strainer containing the anesthetized mosquitoes was placed in a  
1514 60 mm Petri dish (Corning 430166), and ice-cold molecular-grade 100% ethanol was gently  
1515 poured into the cell strainer for 5 sec. The cell strainer with ethanol-rinsed mosquitoes was  
1516 then transferred to a new 60 mm Petri dish and ice-cold Schneider's Medium (Gibco  
1517 21720024) was poured into the cell strainer to rinse. Approximately 20 mL of ice-cold

1518 Schneider's medium was poured into a 100 mm Petri dish (Corning 430293) on wet ice or  
1519 reusable ice pack (Cooler Shock, mid-size freeze pack). Schneider's Medium-rinsed  
1520 mosquitoes were transferred from the cell strainer to the 100 mm Petri dish. A new 70 µm cell  
1521 strainer (pluriSelect 43-10070) with walls trimmed with a sterile razor blade to a height of 0.5 –  
1522 0.75 cm was placed into the same 100 mm Petri dish. The antennae were then removed using  
1523 forceps and placed into the cell strainer. Antennae were rinsed approximately every 10 min by  
1524 agitating the cell strainer and pipetting fresh ice-cold Schneider's Medium into the cell strainer.  
1525 Dissection of each sample was limited to 90 min to ensure nuclei integrity, and when 90 min  
1526 elapsed or all mosquitoes dissected, antennae were transferred into a DNA LoBind 1.5 mL  
1527 tube (Eppendorf 022431021) pre-wet with Schneider's Medium. The cell strainer with antennae  
1528 was inverted with forceps into the tube and approximately 300 µL ice-cold Schneider's Medium  
1529 was pipetted into the cell strainer to release antennae into the Eppendorf tube. The sample  
1530 was then flash-frozen in liquid nitrogen and stored at -70°C until ready for nuclei extraction. A  
1531 total of approximately 1000-1500 antennae were collected for each snRNA-seq batch,  
1532 collected across four dissection sessions. Two batches of female antennae were processed for  
1533 the snRNA-seq data presented in this paper. All tissue was collected at Rockefeller University.  
1534 Batch 1 was processed at Rockefeller University (including nuclei extraction, 10X Genomics  
1535 run, library preparation and sequencing), and Batch 2 was shipped on dry ice and processed  
1536 at Baylor College of Medicine.

#### 1537 1538 **Batch 1 (Rockefeller antenna sample) nuclei extraction**

1539 Nuclei extraction of mosquito antennae was performed as previously described (McLaughlin et  
1540 al., 2021) with modifications. Dissected antennae were thawed on wet ice, and all subsequent  
1541 steps were performed on wet ice unless otherwise noted. Once samples were thawed,  
1542 antennae were centrifuged in a benchtop microcentrifuge for 5-10 sec, Schneider's Medium  
1543 was removed and replaced with 100 µL of homogenization buffer (McLaughlin et al., 2021).  
1544 Antennae from multiple dissection sessions were combined into a single DNA LoBind 1.5 mL  
1545 tube using a low-retention repel polymer technology 200 µL filter tip (TipOne 11821830), with  
1546 ~1 mm from the distal end trimmed using a sterilized and RNase away-treated (Thermo Fisher  
1547 7000TS1) razor blade. With no more than 500 µL buffer present in the tube, tissue was ground  
1548 for 30-60 sec with a pellet pestle motor (Kimble 749540-0000) and RNase-free pestle (Kimble  
1549 749521-0590). The volume of buffer was brought up to 1000 µL with additional ice-cold  
1550 homogenization buffer. Next, a 1 mL Dounce tissue grinder and pestle set (Wheaton 357538)  
1551 that had been autoclaved at 121°C for 4 hr the previous day was pre-wetted with  
1552 homogenization buffer. Using a low-retention (repel polymer technology) 1000 µL filter tip  
1553 (TipOne 11821830), samples were transferred into the Dounce homogenizer. Nuclei were  
1554 released by homogenizing with 20 strokes of the loose pestle, and 40 strokes of the tight  
1555 pestle. Next, a low-retention 1000 µL tip was used to remove ~500 µL of the suspension. The  
1556 suspension was filtered through a 40 µm Flowmi filter (Bel-Art H13680-0040) into a pre-wet 20  
1557 µm PluriStrainer (pluriSelect 43-10020-40) in a 1.5 mL LoBind Eppendorf tube. The second  
1558 ~500 µL antennae nuclei suspension was then filtered the same way into the same Eppendorf  
1559 tube. The suspension was then divided equally into two 1.5 mL LoBind Eppendorf tubes and  
1560 centrifuged for 10 min at 500xG at 4°C. The supernatant was gently discarded without  
1561 disturbing the pellet. Next, pellets were resuspended in 100 µL 1X PBS, 1% bovine serum  
1562 albumin, 10 µL/mL RNase inhibitor (Roche RNAINH-RO) by pipetting 5 times with a low-  
1563 retention 1000 µL tip, combined and pipetted to resuspend and break up cell clumps 15 more  
1564 times. The suspension was then filtered three times by running it through a Flowmi filter into a  
1565 10 µm strainer (pluriSelect 43-10010-40) in a 1.5 mL LoBind Eppendorf tube. To ensure nuclei

1566 were not clumping, 10  $\mu$ L of the suspension was removed and stained with acridine orange  
1567 and propidium iodide (Logos Biosystems, LGBD10012). The concentration of nuclei was  
1568 determined by counting cells on a Luna FX7 automated cell counter (Logos Biosystems  
1569 L70001).

1570

1571 **Batch 1 (Rockefeller antenna sample): 10X Genomics, library preparation and**  
1572 **sequencing**

1573 Single cell 3' expression Libraries were generated using Chromium Single Cell 3' Library & Gel  
1574 Bead kit Version 3.1 (10X Genomics PN1000269). Standard protocols from 10X Genomics  
1575 were followed to generate the dual index libraries. Due to the small nucleus size (4-5  $\mu$ m in  
1576 diameter), 17 cycles were used for cDNA amplification and 13 cycles for index PCR. The  
1577 quality and quantity of the libraries were assessed on Agilent TapeStation, the library was  
1578 sequenced on Illumina NovaSeq 6000 sequencer using 100 cycle SP flowcell and 800 million  
1579 paired reads were generated (read 1 = 28 bp, read 2 = 90 bp).

1580

1581 **Batch 2 (Baylor antenna sample): nuclei extraction**

1582 Nuclei extraction from mosquito antennae were performed as previously described (Li et al.,  
1583 2021) with modifications. Fresh homogenization buffer (Li et al., 2021) was prepared and kept  
1584 on ice. Samples were thawed from -80°C on wet ice, spun down in 100  $\mu$ L Schneider's  
1585 Medium using a bench top spinner, and as much medium as possible was discarded.  
1586 Antennae from multiple dissection sessions were combined into a single 1.5 mL Eppendorf  
1587 tube using a low-retention 200  $\mu$ L filter tip (Rainin 30389240) with ~1 mm from the distal end  
1588 trimmed using a sterilized and RNase away-treated (Thermo Fisher 7000TS1) razor blade  
1589 (VWR 10835-965) and 100  $\mu$ L Homogenization buffer was added. The sample was ground  
1590 with a pestle motor (Kimble 6HAZ6) for 30 – 60 sec on wet ice. 900  $\mu$ L homogenization buffer  
1591 was added, and 1000  $\mu$ L homogenized sample was transferred into the 1 mL Dounce tissue  
1592 grinder set (Wheaton 357538) that had been autoclaved at 200°C for >5 hr or overnight a day  
1593 in advance. Nuclei were released by 20 strokes with a loose Dounce pestle and 40 with a tight  
1594 Dounce pestle on ice, taking care to avoid bubbles. 1000  $\mu$ L of the sample was filtered through  
1595 a 5 mL cell strainer (35  $\mu$ m), and then filtered using 40  $\mu$ m Flowmi (BeArt, H13680-0040) into  
1596 1.5 mL EP tube, centrifuged for 10 min at 1000xG at 4°C. The supernatant was discarded with  
1597 care not to disturb the pellet. The nuclei were resuspended using 500  $\mu$ L 1xPBS/0.5%BSA with  
1598 RNase inhibitor (9.5 mL 1x PBS, 0.5 mL 10% BSA, 50  $\mu$ L RNasin Plusby) pipetting at least 20  
1599 times to completely re-suspend the nuclei. Sample were filtered using 40  $\mu$ m Flowmi into a  
1600 new 5 mL fluorescence-activated cell sorting (FACS) tube and kept on wet ice.

1601

1602 **Batch 2 (Baylor antenna sample): FACS sorting, 10X Genomics, library preparation,**  
1603 **sequencing**

1604 FACS sorting was done using a BD FACSAria III Cell Sorter to collect nuclei. Nuclei were  
1605 stained with Hoechst-33342 (1:1000; >5 min). Hoechst-positive nuclei were collected into 1.5  
1606 mL Eppendorf tube with 500  $\mu$ L 1x PBS with 0.5% BSA as the receiving buffer (RNase inhibitor  
1607 added). For each 10X Genomics run, all nuclei were collected. Approximately 15,000 nuclei  
1608 were collected from the antennae. Nuclei were spun for 10 min at 1000XG at 4°C, and then  
1609 resuspended using 43.2  $\mu$ L 1x PBS with 0.5% BSA (RNase inhibitor added). Since the yield of  
1610 nuclei was low, all nuclei were loaded onto a 10X Genomics controller. 10X Genomics  
1611 sequencing libraries were prepared following the standard protocol from 10X Genomics 3' v3.1  
1612 kit with following settings. All PCR reactions were performed using the Biorad C1000 Touch  
1613 Thermal cycler with 96-Deep Well Reaction Module. 13 cycles were used for cDNA

1614 amplification and 16 cycles were used for sample index PCR. As per 10X Genomics protocol,  
1615 1:10 dilutions of amplified cDNA and final libraries were evaluated on Agilent 4200  
1616 TapeStation. Single-cell RNA libraries were sequenced on Illumina NovaSeq 6000 sequencer  
1617 with minimum sequencing depth of 50,000 reads/cell using the read lengths 28bp Read1, 8bp  
1618 i7 Index, 91bp Read2.

1619  
1620 **Maxillary palp dissection, nuclei extraction, FACS Sorting, 10X Genomics, library**  
1621 **preparation, and sequencing.**

1622 Maxillary palp dissections were conducted as described for the antenna. A total of 2,908 total  
1623 maxillary palps were collected across twenty dissection sessions at Rockefeller. These  
1624 samples were shipped on dry ice and processed at Baylor College of Medicine. Nuclei  
1625 extraction and FACS was performed at Baylor as described for the Batch 2 antenna sample  
1626 with approximately 7,000 nuclei collected. 10X Genomics, library preparation, and sequencing  
1627 was done as described above for the Batch 2 antenna sample.

1628  
1629 **snRNA-seq analysis: cell identification, ambient RNA removal, batch combination, and**  
1630 **neuron classification**

1631 The *Aedes aegypti* genome (AaegL5.0, GCF\_002204515.2 on NCBI) was indexed using Cell  
1632 Ranger (version 6.0.2). FASTQ files generated from 10X Genomics 3' gene expression libraries  
1633 were mapped to the indexed genomes and gene counts in each cell were calculated by  
1634 CellRanger (version 6.0.2). Intron signals were included by specifying the --include-introns  
1635 parameter for cellranger count.

1636  
1637 DecontX from the celda package (version 1.8.1) was chosen for removing the ambient RNAs  
1638 that are produced during the nuclei isolation. The raw and filtered reads generated from Cell  
1639 Ranger were compared by DecontX to obtain decontaminated reads (Figure S9A, Figure  
1640 S13A). The decontaminated reads were rounded by the R base::round function and the  
1641 decontaminated matrices were generated by the DropletUtils package (version 1.12.3).  
1642 Decontaminated expression matrices were loaded into the Seurat package (version 4.0.5) and  
1643 multiplets were identified by DoubletFinder (version 2.0.3). The pK with maximum AUC was  
1644 chosen for DoubletFinder. The multiplet numbers were estimated by the multiplet rate table on  
1645 the 10X Genomics website. DoubletFinder-defined multiplets were excluded for the  
1646 downstream analysis (Figure S9B, Figure S13B). Cells with extreme gene numbers or  
1647 abundant mitochondria transcripts were removed using Seurat. We excluded nuclei expressing  
1648 fewer than 400 or greater than 4000 genes. Nuclei with more than 5% of mitochondrial  
1649 transcripts were excluded. Genes expressed in fewer than 3 nuclei were removed (Figures  
1650 S9C-E, Figure S13C-E).

1651  
1652 Expression matrices of remaining nuclei were loaded into the Seurat package and processed  
1653 by Seurat (version 4.0.5). The analyses applied default parameters of Seurat unless specified.  
1654 Expression matrices were normalized using NormalizeData() function. Highly variable genes  
1655 were selected using FindVariableFeatures(). The data were scaled using the ScaleData()  
1656 function with the vars.to.regress = c('nCount\_RNA') parameter to regress out the effect of the  
1657 total counts. The scaled data were dimensionally reduced using the RunPCA() function. t-  
1658 distributed stochastic neighbor embedding (t-SNE) was used for visualizing the non-linear  
1659 dimensionality reduction with 1 to 50 dimensions. Nuclei were clustered using the Louvain  
1660 algorithm (Figure S9G, Figure 7C).

1661

1662 We performed two independent snRNA-seq experiments on the antenna to collect a large  
1663 number of nuclei for our analysis. The two batches of antenna snRNA-seq data were merged  
1664 and split using `merge()` and `SplitObject()` functions in Seurat. Split objects were normalized and  
1665 selected for highly variable genes independently. To reduce the batch effects from two  
1666 samples, we first selected genes for integrating two batches using the  
1667 `SelectIntegrationFeatures()` function in Seurat (Figure S9F). Two batches were then integrated  
1668 using the `FindIntegrationAnchors()` and `IntegrateData()` functions. Batch-corrected samples  
1669 were then analyzed following the procedures described in the previous section from scaling to  
1670 clustering to identify cluster-specific genes.

1671  
1672 To classify cells as neurons, we first identified genes that are orthologous to the neuronal  
1673 marker genes used in *Drosophila melanogaster* using pBLAST. Four mosquito genes,  
1674 LOC5565901, LOC5570204, LOC5564848, and LOC5570381, are orthologous to the  
1675 *Drosophila melanogaster* neural markers, *syt1*, *elav*, *CadN*, and *brp*, respectively. We saw that  
1676 expression largely overlapped with the olfactory sensory neuron co-receptors *Orco*, *Ir25a*,  
1677 *Ir76b*, *Ir8a*, and *Gr3*, consistent with the idea that these are neuronal markers. We defined  
1678 neural clusters based on the expression of *syt1*, *elav*, *CadN*, and *brp*, and clusters expressing  
1679 at least three neuronal markers in more than 50% of cells in the corresponding cluster were  
1680 defined as neural clusters (Figure S9I, Figure S13H-I). These neural clusters were then  
1681 examined for ligand-selective receptor and co-receptor expression.

#### 1682 **Antenna heat map:**

1683  
1684 The normalized expressions of genes in all nuclei were utilized to plot heatmaps using the  
1685 `ComplexHeatmap` package in R. Epithelia-, glia-, and neuron-enriched genes in the *Drosophila*  
1686 *melanogaster* antenna were considered as references of the corresponding marker genes in  
1687 *Aedes aegypti*.

1688  
1689 **Antenna tSNE plot:** To generate tSNE plots in Figure 5C of all antennal nuclei and antennal  
1690 neurons, expression matrices were first log-normalized, selected for highly variable genes, and  
1691 scaled. Scaled data were applied to the `RunTSNE()` with 1 to 50 dimensions. All antenna  
1692 nuclei and antennal neurons were clustered using the Louvain algorithm with resolutions 0.5  
1693 and 3 respectively (Figure S9G, Figure 5C).

1694  
1695 **Antenna dot plot:** The dot plot of cluster-enriched chemosensory receptors in Figure 5D was  
1696 based on the `DotPlot()` function in Seurat and customized using the `ggplot2` package. The  
1697 mean normalized expression and expression percentage of each chemosensory receptor were  
1698 extracted by the `DotPlot()` function. Chemosensory receptors expressed in more than 35% of  
1699 nuclei in the corresponding cluster with mean expression values (UMI of gene\*10,000 / total  
1700 UMI of cell +1) larger than 1 were considered cluster-dominant chemosensory receptors  
1701 (Figure S10A-B). The expression percentages of all dominant chemosensory receptors were  
1702 scaled and clustered. For visualizing differences lower-expressed ligand-selective receptor  
1703 subunits, circles representing a mean expression value greater than 20 have the same color.  
1704 The expression percentage and mean expression of each chemosensory receptor were plotted  
1705 using the `geom_point()` function in `ggplot2`. The `hclust()` function was used to cluster genes.

1706  
1707 **Antenna chord plot:** The chord plot of co-expressed chemosensory receptor in Figure 5E  
1708 was generated using the `chorddiag` package in R. Normalized expressions of the top 20  
1709 expressed chemosensory receptor were examined for the co-expression in the antenna



1710 neuron population. Receptors that express more than 1 normalization value were considered  
1711 as positively expressed. Each expressed chemosensory receptor was iteratively compared to  
1712 the expression of the remaining 19 chemosensory receptor in the corresponding nuclei. If more  
1713 than 20 nuclei expressed two chemosensory receptors simultaneously, these two receptors  
1714 were considered as co-expressed chemosensory receptors and visualized using the chorddiag  
1715 package.

1716  
1717 **Antenna scatter plot:** The co-expression scatter plot in [Figure S11F](#) was based on the  
1718 normalization expression from each single nuclei for a pair of chemosensory receptors. The  
1719 normalization values were plotted using the `geom_point()` function of the `ggplot2` package in R.

1720  
1721 **Antenna simplified co-expression heatmap:** Heatmaps were generated for the purposes of  
1722 visualizing examples co-expression patterns from a large dataset of 6,645 neurons and 231  
1723 chemosensory receptors (106 ORs, 73 IRs, and 52 GRs). For each chemosensory receptor,  
1724 cells expressing the given gene above a normalized expression level threshold of 0.5  
1725  $\log(\text{UMI} \times 10,000 + 1)$  were identified and subsetted from the neural population ([Figure S11A-B](#)).  
1726 Background noise of chemosensory receptor expression made it difficult to identify robust  
1727 patterns of co-expression. Therefore, for the purpose of sorting cells to visualize expression  
1728 patterns, we reclustered chemosensory receptor-expressing cell population using  
1729 `FindNeighbors()`, `RunPCA()` with 1 to 50 dimensions and `FindClusters()` with a resolution of 3.  
1730 This unsupervised clustering grouped cells based on their whole transcriptome, not solely  
1731 based on chemosensory receptor expression. In many cases, cells in a cluster exhibited the  
1732 same co-expression patterns. In heatmaps illustrating all the chemosensory receptors using  
1733 scaled expression levels, these expression patterns were visible by eye ([Figure S11B](#)).  
1734 Clusters exhibiting representative patterns were selected from the population, and heatmaps  
1735 were re-generated for simplified co-expression heatmaps in [Figure 5F-I](#) and [Figure S11C-](#)  
1736 [F](#). For example, for analysis of *Ir41k* co-expression patterns: 412 cells were selected from the  
1737 population with a normalized expression threshold above 0.5  $\log(\text{UMI} \times 10,000 + 1)$ , and  
1738 clustered using 50 principle components and a cluster resolution of 3 ([Figure S11B](#)). 6 clusters  
1739 were identified (2, 3, 4, 6, 7, 8) as examples to illustrate co-expression patterns. In the  
1740 simplified heatmap for *Ir41k* only, cells were reclustered using 9 principal components and a  
1741 1.9 clustering resolution ([Figure 5F](#)). In all other simplified heatmaps, the same clusters were  
1742 used as identified in the larger co-expression heatmap.

1743  
1744 **Maxillary palp: tSNE, heatmap, chord plot, expression feature plot**

1745 The tSNE of maxillary palp nuclei in [Figure 7C](#) was generated similarly to the antenna tSNE,  
1746 with cluster resolution adjusted to 2.5. The heatmap of all maxillary palp nuclei in [Figure 7B,D](#)  
1747 was plotted as described for the antenna heatmap. The maxillary palp chord plot in [Figure 7E](#)  
1748 was processed similarly to the antenna one. The top 20 most highly expressed chemosensory  
1749 receptors except for *Gr1* and *Gr2*, together with *Gr3*, were examined for the co-expression at  
1750 single-nuclei resolution. Co-expressed pairs of receptors found in more than 10 cells were  
1751 included. Maxillary palp gene expression feature plots were made using the command  
1752 `FeaturePlot` on normalized expression values.

1753  
1754 **Mosquito preparation for single-sensillum recordings**

1755 Female mosquitoes from two wild-type and 3 mutant strains ( $+/+^{ORL}$ ,  $+/+^{LVP}$ , *Ir25a*<sup>BamHI/BamHI</sup>,  
1756 *Gr3*<sup>4/4</sup> and *Orco*<sup>16/16</sup>) five to seven days post-emergence, were anesthetized on wet ice for 1-2  
1757 min. An individual mosquito was then glued onto a piece of double-sided sticky tape on a

1758 microscope slide (76 × 26 mm) and secured by a piece of tape covering the thorax and  
1759 abdomen. The maxillary palps were immobilized using a short segment of human hair placed  
1760 over the basal part of the maxillary palps. The sensilla of the maxillary palps were  
1761 subsequently visualized using an Olympus light microscope (BX51WI; LRI Instrument AB,  
1762 Lund, Sweden) at 750×. A continuous humidified stream of synthetic air (Strandmöllen AB,  
1763 Ljungby, Sweden) was passed over the maxillary palp (2 L min<sup>-1</sup>) via a glass tube (7 mm i.d.),  
1764 terminating 10 mm from the maxillary palps, to avoid desiccation.

### 1765 1766 **Single-sensillum recordings from maxillary palp capitae peg sensilla**

1767 Electrophysiological recordings from capitae peg sensilla were made and analyzed according  
1768 to previously described protocols (Ghaninia et al., 2019; Majeed et al., 2016). In brief, two  
1769 tungsten microelectrodes, electrolytically sharpened in 10% KNO<sub>2</sub> solution, were used as  
1770 reference and recording electrodes. The reference electrode was inserted into the eye and the  
1771 recording electrode was positioned at the base or shaft of the sensillum using a piezo  
1772 motorized micromanipulator (Märzhäuser Wetzlar GmbH & Co. KG, Wetzlar Germany) until  
1773 electrical contact was established. Extracellular signals from the olfactory sensory neurons  
1774 housed in the capitae peg sensilla were amplified and recorded using a high-impedance probe  
1775 (universal single ended probe) and a USB-acquisition controller (IDAC-4) (Ockenfels Syntech  
1776 GmbH, Buchenbach, Germany). Extracellular spikes were differentiated based on amplitude  
1777 as A, B, and C, according to standard nomenclature (Ghaninia et al., 2019; Majeed et al.,  
1778 2016), and manually counted using Autospike 3.7 (Ockenfels Syntech GmbH). The response  
1779 to odorant stimuli were analyzed by subtracting the number of spikes 0.5 sec post-stimulus  
1780 from the number of spikes 0.5 sec pre-stimulus, and the outcome was multiplied by two to  
1781 obtain a spike/sec measurement. In cases where the neuronal response was high enough to  
1782 result in pinching of the spike train (>150 spikes/sec), the number of spikes post-stimulus were  
1783 counted for the first 100 msec and then multiplied by 5, as the inter-spike frequency is constant  
1784 once the neuron is activated maximally. Neurons were classified as responders or non-  
1785 responders based upon whether their odorant response was above or below a 30 spikes/sec  
1786 threshold, respectively.

### 1787 1788 **Odorant stimulus delivery for single-sensillum recordings**

1789 Odorants used in [Figure 8](#) were selected for the highest purity available (>98%): R(-)-1-octen-  
1790 3-ol (PubChem CID: 6992244, Penta Manufacturing 15-18900); acetone (PubChem CID: 180  
1791 Sigma A4206); hexyl amine (PubChem CID: 8102, Sigma 219703); triethyl amine (PubChem  
1792 CID: 1146, Sigma T0886). All odorants were diluted into a large stock solution that was used  
1793 throughout each entire experiment to avoid variability in concentrations. Serial decadic  
1794 dilutions of acetone, hexyl amine, and triethyl amine were made in MilliQ ultrapure water (18  
1795 megaohm resistance) and 1-octen-3-ol was diluted in paraffin oil (EMD Millipore #PX0045-3).  
1796 Aliquots of 10 µL of each compound and dilution was pipetted onto a piece of filter paper (5 ×  
1797 20 mm) placed inside a Pasteur pipette. Similar volumes of MilliQ ultrapure water and paraffin  
1798 oil were used as controls. Stimulus cartridges were used within 5 min after loading, and only  
1799 used once. For dose-response analysis using CO<sub>2</sub>, gas cylinders containing metered amounts  
1800 of CO<sub>2</sub> (300, 600, 1200, 4800 ppm) and oxygen (20%), balanced by nitrogen (Strandmöllen  
1801 AB, Ljungby, Sweden) were used as previously described (Ghaninia et al. 2019). Odorants  
1802 were introduced by passing a 0.5 sec air puff through the Pasteur pipette using a stimulus  
1803 controller (Ockenfels Syntech GmbH) into the airstream passing over the maxillary palps  
1804 through a hole in the glass tube, 10 cm upstream from the preparation.

1805

1806 **Statistical analysis**

1807 All statistical analyses were performed using Prism (GraphPad), Excel (Microsoft) or R version  
1808 3.6.3 (R Development CoreTeam, 2017). Data are shown as mean±SEM unless otherwise  
1809 noted. Details of statistical methods are reported in the figure legends.

1810

1811 **DATA AND RESOURCE AVAILABILITY**

1812 Supplementary [Figures S1-S14](#) accompany the paper. Raw data are provided in [Data File 1](#),  
1813 and additional raw data, plots and analysis, and custom scripts are available at  
1814 [https://github.com/VosshallLab/Younger\\_Herre\\_Vosshall2020](https://github.com/VosshallLab/Younger_Herre_Vosshall2020). Additional raw data and  
1815 analysis of the snRNA-seq data are on Github at  
1816 [https://github.com/VosshallLab/Younger\\_Herre\\_Vosshall2020](https://github.com/VosshallLab/Younger_Herre_Vosshall2020). These include processed data  
1817 (Seurat files) and scripts, in addition to descriptive statistics and analysis, including a pseudo-  
1818 bulk table of gene counts and cell number distribution, violin plots, feature plots, and broad co-  
1819 expression heatmaps. snRNA-seq sequencing reads are freely available from the Gene  
1820 Expression Omnibus (accession number GEO: GSE192978). Additional files related to  
1821 snRNA-seq data analysis and visualization are available at Zenodo (antenna:  
1822 <https://zenodo.org/record/5818543#.YdX7VWjMluU>; maxillary palp:  
1823 <https://zenodo.org/record/5818952#.YdX7KWjMluU>, Plasmids are available from Addgene  
1824 (accession #162520-162526).

## REFERENCES

- 1825  
1826 Abuin, L., Bargeton, B., Ulbrich, M.H., Isacoff, E.Y., Kellenberger, S., and Benton, R. (2011).  
1827 Functional architecture of olfactory ionotropic glutamate receptors. *Neuron* 69, 44-60.
- 1828  
1829 Acree, F., Jr., Turner, R.B., Gouck, H.K., Beroza, M., and Smith, N. (1968). L-Lactic acid: a  
mosquito attractant isolated from humans. *Science* 161, 1346-1347.
- 1830  
1831 Allan, S.A., Day, J.F., and Edman, J.D. (1987). Visual ecology of biting flies. *Annu Rev*  
*Entomol* 32, 297-316.
- 1832  
1833 Bashkirova, E., and Lomvardas, S. (2019). Olfactory receptor genes make the case for inter-  
chromosomal interactions. *Curr Opin Genet Dev* 55, 106-113.
- 1834  
1835 Basrur, N.S., De Obaldia, M.E., Morita, T., Herre, M., von Heynitz, R.K., Tsiotghay, Y.N., and  
1836 Vosshall, L.B. (2020). *Fruitless* mutant male mosquitoes gain attraction to human odor. *Elife* 9,  
e63982.
- 1837  
1838 Benton, R., Sachse, S., Michnick, S.W., and Vosshall, L.B. (2006). Atypical membrane  
topology and heteromeric function of *Drosophila* odorant receptors in vivo. *PLoS Biol* 4, e20.
- 1839  
1840 Benton, R., Vannice, K.S., Gomez-Diaz, C., and Vosshall, L.B. (2009). Variant ionotropic  
glutamate receptors as chemosensory receptors in *Drosophila*. *Cell* 136, 149-162.
- 1841  
1842 Bernier, U.R., Booth, M.M., and Yost, R.A. (1999). Analysis of human skin emanations by gas  
1843 chromatography/mass spectrometry. 1. Thermal desorption of attractants for the yellow fever  
mosquito (*Aedes aegypti*) from handled glass beads. *Anal Chem* 71, 1-7.
- 1844  
1845 Bernier, U.R., Kline, D.L., Barnard, D.R., Schreck, C.E., and Yost, R.A. (2000). Analysis of  
1846 human skin emanations by gas chromatography/mass spectrometry. 2. Identification of volatile  
1847 compounds that are candidate attractants for the yellow fever mosquito (*Aedes aegypti*). *Anal*  
*Chem* 72, 747-756.
- 1848  
1849 Bisch-Knaden, S., Dahake, A., Sachse, S., Knaden, M., and Hansson, B.S. (2018). Spatial  
1850 representation of feeding and oviposition odors in the brain of a hawkmoth. *Cell Rep* 22, 2482-  
2492.
- 1851  
1852 Bohbot, J., Pitts, R.J., Kwon, H.W., Rutzler, M., Robertson, H.M., and Zwiebel, L.J. (2007).  
1853 Molecular characterization of the *Aedes aegypti* odorant receptor gene family. *Insect Mol Biol*  
16, 525-537.
- 1854  
1855 Bohbot, J.D., and Dickens, J.C. (2009). Characterization of an enantioselective odorant  
receptor in the yellow fever mosquito *Aedes aegypti*. *PLoS One* 4, e7032.
- 1856  
1857 Bohbot, J.D., Sparks, J.T., and Dickens, J.C. (2014). The maxillary palp of *Aedes aegypti*, a  
model of multisensory integration. *Insect Biochem Mol Biol* 48, 29-39.
- 1858  
1859 Brand, A.H., and Perrimon, N. (1993). Targeted gene expression as a means of altering cell  
fates and generating dominant phenotypes. *Development* 118, 401-415.

- 1860 Brown, J.E., Evans, B.R., Zheng, W., Obas, V., Barrera-Martinez, L., Egizi, A., Zhao, H.,  
1861 Caccone, A., and Powell, J.R. (2014). Human impacts have shaped historical and recent  
1862 evolution in *Aedes aegypti*, the dengue and yellow fever mosquito. *Evolution* **68**, 514-525.
- 1863 Buck, L., and Axel, R. (1991). A novel multigene family may encode odorant receptors: a  
1864 molecular basis for odor recognition. *Cell* **65**, 175-187.
- 1865 Butterwick, J.A., Del Marmol, J., Kim, K.H., Kahlson, M.A., Rogow, J.A., Walz, T., and Ruta, V.  
1866 (2018). Cryo-EM structure of the insect olfactory receptor Orco. *Nature* **560**, 447-452.
- 1867 Chess, A., Simon, I., Cedar, H., and Axel, R. (1994). Allelic inactivation regulates olfactory  
1868 receptor gene expression. *Cell* **78**, 823-834.
- 1869 Choi, H.M.T., Schwarzkopf, M., Fornace, M.E., Acharya, A., Artavanis, G., Stegmaier, J.,  
1870 Cunha, A., and Pierce, N.A. (2018). Third-generation *in situ* hybridization chain reaction:  
1871 multiplexed, quantitative, sensitive, versatile, robust. *Development* **145**, 10.1242/dev.165753.
- 1872 Clyne, P.J., Warr, C.G., and Carlson, J.R. (2000). Candidate taste receptors in *Drosophila*.  
1873 *Science* **287**, 1830-1834.
- 1874 Clyne, P.J., Warr, C.G., Freeman, M.R., Lessing, D., Kim, J., and Carlson, J.R. (1999). A novel  
1875 family of divergent seven-transmembrane proteins: candidate odorant receptors in *Drosophila*.  
1876 *Neuron* **22**, 327-338.
- 1877 Cook, J.I., Majeed, S., Ignell, R., Pickett, J.A., Birkett, M.A., and Logan, J.G. (2011).  
1878 Enantiomeric selectivity in behavioural and electrophysiological responses of *Aedes aegypti*  
1879 and *Culex quinquefasciatus* mosquitoes. *Bull Entomol Res* **101**, 541-550.
- 1880 Cork, A., and Park, K.C. (1996). Identification of electrophysiologically-active compounds for  
1881 the malaria mosquito, *Anopheles gambiae*, in human sweat extracts. *Med Vet Entomol* **10**,  
1882 269-276.
- 1883 Couto, A., Alenius, M., and Dickson, B.J. (2005). Molecular, anatomical, and functional  
1884 organization of the *Drosophila* olfactory system. *Curr Biol* **15**, 1535-1547.
- 1885 Davis, E.E. (1984). Regulation of sensitivity in the peripheral chemoreceptor systems for host-  
1886 seeking behavior by a haemolymph-borne factor in *Aedes aegypti*. *J Insect Physiol* **30**, 179-  
1887 183.
- 1888 de Lacy Costello, B., Amann, A., Al-Kateb, H., Flynn, C., Filipiak, W., Khalid, T., Osborne, D.,  
1889 and Ratcliffe, N.M. (2014). A review of the volatiles from the healthy human body. *J Breath*  
1890 *Res* **8**, 014001.
- 1891 De Obaldia, M.E., Morita, T., Dedmon, L.C., Boehmler, D.J., Jiang, C.S., Zeledon, E.V., Cross,  
1892 J.R., and Vosshall, L.B. (2022). Differential mosquito attraction to humans is associated with  
1893 skin-derived carboxylic acid levels. *BioRxiv* DOI\_101101/20220105475088.
- 1894 DeGennaro, M., McBride, C.S., Seeholzer, L., Nakagawa, T., Dennis, E.J., Goldman, C.,  
1895 Jasinskiene, N., James, A.A., and Vosshall, L.B. (2013). *orco* mutant mosquitoes lose strong  
1896 preference for humans and are not repelled by volatile DEET. *Nature* **498**, 487-491.

- 1897 Del Mármol, J., Yedlin, M.A., and Ruta, V. (2021). The structural basis of odorant recognition in  
1898 insect olfactory receptors. *Nature* 597, 126-131.
- 1899 Distler, P., and Boeckh, J. (1997). Central projections of the maxillary and antennal nerves in  
1900 the mosquito *Aedes aegypti*. *J Exp Biol* 200, 1873-1879.
- 1901 Ebrahim, S.A., Dweck, H.K., Stokl, J., Hofferberth, J.E., Trona, F., Weniger, K., Rybak, J.,  
1902 Seki, Y., Stensmyr, M.C., Sachse, S., *et al.* (2015). *Drosophila* avoids parasitoids by sensing  
1903 their semiochemicals via a dedicated olfactory circuit. *PLoS Biol* 13, e1002318.
- 1904 Fishilevich, E., and Vosshall, L.B. (2005). Genetic and functional subdivision of the *Drosophila*  
1905 antennal lobe. *Curr Biol* 15, 1548-1553.
- 1906 Flanagan, D., and Mercer, A.R. (1989). An atlas and 3-D reconstruction of the antennal lobes  
1907 in the worker honey bee, *Apis mellifera* L. (Hymenoptera : Apidae). *Int J Insect Morphol &*  
1908 *Embryol* 18, 145-159.
- 1909 Gallagher, M., Wysocki, C.J., Leyden, J.J., Spielman, A.I., Sun, X., and Preti, G. (2008).  
1910 Analyses of volatile organic compounds from human skin. *Br J Dermatol* 159, 780-791.
- 1911 Gao, Q., and Chess, A. (1999). Identification of candidate *Drosophila* olfactory receptors from  
1912 genomic DNA sequence. *Genomics* 60, 31-39.
- 1913 Geier, M., Bosch, O.J., and Boeckh, J. (1999). Ammonia as an attractive component of host  
1914 odour for the yellow fever mosquito, *Aedes aegypti*. *Chem Senses* 24, 647-653.
- 1915 Ghaninia, M., Hansson, B.S., and Ignell, R. (2007). The antennal lobe of the African malaria  
1916 mosquito, *Anopheles gambiae* - innervation and three-dimensional reconstruction. *Arthropod*  
1917 *Struct Dev* 36, 23-39.
- 1918 Ghaninia, M., Majeed, S., Dekker, T., Hill, S.R., and Ignell, R. (2019). Hold your breath -  
1919 Differential behavioral and sensory acuity of mosquitoes to acetone and carbon dioxide. *PLoS*  
1920 *One* 14, e0226815.
- 1921 Gillies, M.T. (1980). The role of carbon dioxide in host-finding in mosquitoes  
1922 (Diptera:Culicidae): a review. *Bull Entomol Res* 70, 525-532.
- 1923 Gouck, H.K. (1972). Host preferences of various strains of *Aedes aegypti* and *Aedes simpsoni*  
1924 as determined by an olfactometer. *Bull World Health Org* 47, 680-683.
- 1925 Grabe, V., Strutz, A., Baschwitz, A., Hansson, B.S., and Sachse, S. (2015). Digital in vivo 3D  
1926 atlas of the antennal lobe of *Drosophila melanogaster*. *J Comp Neurol* 523, 530-544.
- 1927 Grant, A.J., Wigton, B.E., Aghajanian, J.G., and O'Connell, R.J. (1995). Electrophysiological  
1928 responses of receptor neurons in mosquito maxillary palp sensilla to carbon dioxide. *J Comp*  
1929 *Physiol [A]* 177, 389-396.
- 1930 Greer, P.L., Bear, D.M., Lassance, J.M., Bloom, M.L., Tsukahara, T., Pashkovski, S.L.,  
1931 Masuda, F.K., Nowlan, A.C., Kirchner, R., Hoekstra, H.E., *et al.* (2016). A family of non-GPCR  
1932 chemosensors defines an alternative logic for mammalian olfaction. *Cell* 165, 1734-1748.

- 1933 Grosse-Wilde, E., Kuebler, L.S., Bucks, S., Vogel, H., Wicher, D., and Hansson, B.S. (2011).  
1934 Antennal transcriptome of *Manduca sexta*. *Proc Natl Acad Sci U S A* *108*, 7449-7454.
- 1935 Hussain, A., Zhang, M., Üçpunar, H.K., Svensson, T., Quillery, E., Gompel, N., Ignell, R., and  
1936 Grunwald Kadow, I.C. (2016). Ionotropic chemosensory receptors mediate the taste and smell  
1937 of polyamines. *PLoS Biol* *14*, e1002454.
- 1938 Ignell, R., Dekker, T., Ghaninia, M., and Hansson, B.S. (2005). Neuronal architecture of the  
1939 mosquito deutocerebrum. *J Comp Neurol* *493*, 207-240.
- 1940 Ihara, S., Yoshikawa, K., and Touhara, K. (2013). Chemosensory signals and their receptors in  
1941 the olfactory neural system. *Neuroscience* *254*, 45-60.
- 1942 Ito, K., Shinomiya, K., Ito, M., Armstrong, J.D., Boyan, G., Hartenstein, V., Harzsch, S.,  
1943 Heisenberg, M., Homberg, U., Jenett, A., *et al.* (2014). A systematic nomenclature for the  
1944 insect brain. *Neuron* *81*, 755-765.
- 1945 Jafari, S., and Alenius, M. (2015). Cis-regulatory mechanisms for robust olfactory sensory  
1946 neuron class-restricted odorant receptor gene expression in *Drosophila*. *PLoS Genet* *11*,  
1947 e1005051.
- 1948 Jones, W.D., Cayirlioglu, P., Kadow, I.G., and Vosshall, L.B. (2007). Two chemosensory  
1949 receptors together mediate carbon dioxide detection in *Drosophila*. *Nature* *445*, 86-90.
- 1950 Jové, V., Gong, Z., Hol, F.J.H., Zhao, Z., Sorrells, T.R., Carroll, T.S., Prakash, M., McBride,  
1951 C.S., and Vosshall, L.B. (2020). Sensory discrimination of blood and floral nectar by *Aedes*  
1952 *aegypti* mosquitoes. *Neuron* *108*, 1163–1180.
- 1953 Karner, T., Kellner, I., Schultze, A., Breer, H., and Krieger, J. (2015). Co-expression of six  
1954 tightly clustered odorant receptor genes in the antenna of the malaria mosquito *Anopheles*  
1955 *gambiae*. *Front Ecol Evol* *3*, 10.3389/fevo.2015.00026.
- 1956 Kistler, K.E., Vosshall, L.B., and Matthews, B.J. (2015). Genome engineering with CRISPR-  
1957 Cas9 in the mosquito *Aedes aegypti*. *Cell Rep* *11*, 51-60.
- 1958 Kline, D.L. (1994). Olfactory attractants for mosquito surveillance and control: 1-octen-3-ol. *J*  
1959 *Am Mosq Control Assoc* *10*, 280-287.
- 1960 Kwon, H.W., Lu, T., Rutzler, M., and Zwiebel, L.J. (2006). Olfactory responses in a gustatory  
1961 organ of the malaria vector mosquito *Anopheles gambiae*. *Proc Natl Acad Sci U S A* *103*,  
1962 13526-13531.
- 1963 Kwon, J.Y., Dahanukar, A., Weiss, L.A., and Carlson, J.R. (2007). The molecular basis of CO<sub>2</sub>  
1964 reception in *Drosophila*. *Proc Natl Acad Sci U S A* *104*, 3574-3578.
- 1965 Laissue, P.P., Reiter, C., Hiesinger, P.R., Halter, S., Fischbach, K.F., and Stocker, R.F. (1999).  
1966 Three-dimensional reconstruction of the antennal lobe in *Drosophila melanogaster*. *J Comp*  
1967 *Neurol* *405*, 543-552.

- 1968 Larsson, M.C., Domingos, A.I., Jones, W.D., Chiappe, M.E., Amrein, H., and Vosshall, L.B.  
1969 (2004). *Or83b* encodes a broadly expressed odorant receptor essential for *Drosophila*  
1970 olfaction. *Neuron* **43**, 703-714.
- 1971 Li, H., Janssens, J., De Waegeneer, M., Kolluru, S.S., Davie, K., Gardeux, V., Saelens, W.,  
1972 David, F., Brbić, M., Leskovec, J., *et al.* (2021). Fly Cell Atlas: a single-cell transcriptomic atlas  
1973 of the adult fruit fly. *bioRxiv*, 2021.2007.2004.451050.
- 1974 Li, H., Li, T., Horns, F., Li, J., Xie, Q., Xu, C., Wu, B., Kebschull, J.M., McLaughlin, C.N.,  
1975 Kolluru, S.S., *et al.* (2020). Single-cell transcriptomes reveal diverse regulatory strategies for  
1976 olfactory receptor expression and axon targeting. *Curr Biol* **30**, 1189-1198.e1185.
- 1977 Li, Q., Barish, S., Okuwa, S., Maciejewski, A., Brandt, A.T., Reinhold, D., Jones, C.D., and  
1978 Volkan, P.C. (2016). A functionally conserved gene regulatory network module governing  
1979 olfactory neuron diversity. *PLoS Genet* **12**, e1005780.
- 1980 Lu, T., Qiu, Y.T., Wang, G., Kwon, J.Y., Rutzler, M., Kwon, H.W., Pitts, R.J., van Loon, J.J.,  
1981 Takken, W., Carlson, J.R., *et al.* (2007). Odor coding in the maxillary palp of the malaria vector  
1982 mosquito *Anopheles gambiae*. *Curr Biol* **17**, 1533-1544.
- 1983 Majeed, S., Hill, S.R., Birgersson, G., and Ignell, R. (2016). Detection and perception of  
1984 generic host volatiles by mosquitoes modulate host preference: context dependence of (R)-1-  
1985 octen-3-ol. *R Soc Open Sci* **3**, 160467.
- 1986 Majeed, S., Hill, S.R., Dekker, T., and Ignell, R. (2017). Detection and perception of generic  
1987 host volatiles by mosquitoes: responses to CO<sub>2</sub> constrains host-seeking behaviour. *R Soc*  
1988 *Open Sci* **4**, 170189.
- 1989 Manning, L., and Doe, C.Q. (2017). Immunofluorescent antibody staining of intact *Drosophila*  
1990 larvae. *Nat Protoc* **12**, 1-14.
- 1991 Matthews, B.J., Dudchenko, O., Kingan, S.B., Koren, S., Antoshechkin, I., Crawford, J.E.,  
1992 Glassford, W.J., Herre, M., Redmond, S.N., Rose, N.H., *et al.* (2018). Improved reference  
1993 genome of *Aedes aegypti* informs arbovirus vector control. *Nature* **563**, 501-507.
- 1994 Matthews, B.J., McBride, C.S., DeGennaro, M., Despo, O., and Vosshall, L.B. (2016). The  
1995 neurotranscriptome of the *Aedes aegypti* mosquito. *BMC Genomics* **17**, 32.
- 1996 Matthews, B.J., Younger, M.A., and Vosshall, L.B. (2019). The ion channel *ppk301* controls  
1997 freshwater egg-laying in the mosquito *Aedes aegypti*. *Elife* **8**, e43963.
- 1998 McBride, C.S., Baier, F., Omondi, A.B., Spitzer, S.A., Lutomiah, J., Sang, R., Ignell, R., and  
1999 Vosshall, L.B. (2014). Evolution of mosquito preference for humans linked to an odorant  
2000 receptor. *Nature* **515**, 222-227.
- 2001 Mclver, S.B. (1972). Fine structure of pegs on the palps of female culicine mosquitoes. *Can J*  
2002 *Zool* **50**, 571-576.
- 2003 Mclver, S.B. (1982). Sensilla of mosquitoes (Diptera:Cilicidae). *Journal of Medical Entomology*  
2004 **19**, 489-535.



- 2005 McLaughlin, C.N., Brbić, M., Xie, Q., Li, T., Horns, F., Kolluru, S.S., Kebschull, J.M., Vacek, D.,  
2006 Xie, A., Li, J., *et al.* (2021). Single-cell transcriptomes of developing and adult olfactory  
2007 receptor neurons in *Drosophila*. *Elife* 10.
- 2008 McMeniman, C.J., Corfas, R.A., Matthews, B.J., Ritchie, S.A., and Vosshall, L.B. (2014).  
2009 Multimodal integration of carbon dioxide and other sensory cues drives mosquito attraction to  
2010 humans. *Cell* 156, 1060-1071.
- 2011 Min, S., Ai, M., Shin, S.A., and Suh, G.S. (2013). Dedicated olfactory neurons mediating  
2012 attraction behavior to ammonia and amines in *Drosophila*. *Proc Natl Acad Sci U S A* 110,  
2013 E1321-1329.
- 2014 Mombaerts, P., Wang, F., Dulac, C., Chao, S.K., Nemes, A., Mendelsohn, M., Edmondson, J.,  
2015 and Axel, R. (1996). Visualizing an olfactory sensory map. *Cell* 87, 675-686.
- 2016 Montell, C. (2009). A taste of the *Drosophila* gustatory receptors. *Curr Opin Neurobiol* 19, 345-  
2017 353.
- 2018 Neuhaus, E.M., Gisselmann, G., Zhang, W., Dooley, R., Stortkuhl, K., and Hatt, H. (2005).  
2019 Odorant receptor heterodimerization in the olfactory system of *Drosophila melanogaster*. *Nat*  
2020 *Neurosci* 8, 15-17.
- 2021 Ni, L., Klein, M., Svec, K.V., Budelli, G., Chang, E.C., Ferrer, A.J., Benton, R., Samuel, A.D.,  
2022 and Garrity, P.A. (2016). The Ionotropic Receptors IR21a and IR25a mediate cool sensing in  
2023 *Drosophila*. *Elife* 5.
- 2024 Omer, S.M., and Gillies, M.T. (1971). Loss of response to carbon dioxide in palpectomized  
2025 female mosquitoes. *Ent Exp & Appl* 14, 251-252.
- 2026 Potter, C.J., Tasic, B., Russler, E.V., Liang, L., and Luo, L. (2010). The Q system: a  
2027 repressible binary system for transgene expression, lineage tracing, and mosaic analysis. *Cell*  
2028 141, 536-548.
- 2029 Prieto-Godino, L.L., Rytz, R., Cruchet, S., Bargeton, B., Abuin, L., Silbering, A.F., Ruta, V., Dal  
2030 Peraro, M., and Benton, R. (2017). Evolution of acid-sensing olfactory circuits in Drosophilids.  
2031 *Neuron* 93, 661-676.e666.
- 2032 Raji, J.I., Melo, N., Castillo, J.S., Gonzalez, S., Saldana, V., Stensmyr, M.C., and DeGennaro,  
2033 M. (2019). *Aedes aegypti* mosquitoes detect acidic volatiles found in human odor using the  
2034 *IR8a* pathway. *Curr Biol* 29, 1253-1262 e1257.
- 2035 Ray, A., van der Goes van Naters, W., and Carlson, J.R. (2008). A regulatory code for neuron-  
2036 specific odor receptor expression. *PLoS Biol* 6, e125.
- 2037 Ressler, K.J., Sullivan, S.L., and Buck, L.B. (1994). Information coding in the olfactory system:  
2038 evidence for a stereotyped and highly organized epitope map in the olfactory bulb. *Cell* 79,  
2039 1245-1255.

- 2040 Riabinina, O., Luginbuhl, D., Marr, E., Liu, S., Wu, M.N., Luo, L., and Potter, C.J. (2015).  
2041 Improved and expanded Q-system reagents for genetic manipulations. *Nat Methods* 12, 219-  
2042 222, 215 p following 222.
- 2043 Riabinina, O., Task, D., Marr, E., Lin, C.C., Alford, R., O'Brochta, D.A., and Potter, C.J. (2016).  
2044 Organization of olfactory centres in the malaria mosquito *Anopheles gambiae*. *Nat Commun* 7,  
2045 13010.
- 2046 Riabinina, O., Vernon, S.W., Dickson, B.J., and Baines, R.A. (2019). Split-QF system for fine-  
2047 tuned transgene expression in *Drosophila*. *Genetics* 212, 53-63.
- 2048 Robertson, H.M., Gadau, J., and Wanner, K.W. (2010). The insect chemoreceptor superfamily  
2049 of the parasitoid jewel wasp *Nasonia vitripennis*. *Insect Mol Biol* 19 *Suppl* 1, 121-136.
- 2050 Robertson, H.M., Warr, C.G., and Carlson, J.R. (2003). Molecular evolution of the insect  
2051 chemoreceptor gene superfamily in *Drosophila melanogaster*. *Proc Natl Acad Sci U S A* 100  
2052 *Suppl* 2, 14537-14542.
- 2053 Rose, N.H., Sylla, M., Badolo, A., Lutomiah, J., Ayala, D., Aribodor, O.B., Ibe, N., Akorli, J.,  
2054 Otoo, S., Mutebi, J.P., *et al.* (2020). Climate and urbanization drive mosquito preference for  
2055 humans. *Curr Biol* 30, 3570-3579 e3576.
- 2056 Roth, L.M. (1951). Loci of sensory end-organs used by mosquitoes (*Aedes aegypti* (L.) and  
2057 *Anopheles quadrimaculatus say*) in receiving host stimuli. *Ann Entomol Soc Am* 44, 59-74.
- 2058 Sato, K., Pellegrino, M., Nakagawa, T., Nakagawa, T., Vosshall, L.B., and Touhara, K. (2008).  
2059 Insect olfactory receptors are heteromeric ligand-gated ion channels. *Nature* 452, 1002-1006.
- 2060 Schaefer, M.L., Finger, T.E., and Restrepo, D. (2001). Variability of position of the P2  
2061 glomerulus within a map of the mouse olfactory bulb. *J Comp Neurol* 436, 351-362.
- 2062 Scott, K., Brady, R., Jr., Cravchik, A., Morozov, P., Rzhetsky, A., Zuker, C., and Axel, R.  
2063 (2001). A chemosensory gene family encoding candidate gustatory and olfactory receptors in  
2064 *Drosophila*. *Cell* 104, 661-673.
- 2065 Semmelhack, J.L., and Wang, J.W. (2009). Select *Drosophila* glomeruli mediate innate  
2066 olfactory attraction and aversion. *Nature* 459, 218-223.
- 2067 Shaner, N.C., Campbell, R.E., Steinbach, P.A., Giepmans, B.N., Palmer, A.E., and Tsien, R.Y.  
2068 (2004). Improved monomeric red, orange and yellow fluorescent proteins derived from  
2069 *Discosoma sp.* red fluorescent protein. *Nat Biotechnol* 22, 1567-1572.
- 2070 Shankar, S., and McMeniman, C.J. (2020). An updated antennal lobe atlas for the yellow fever  
2071 mosquito *Aedes aegypti*. *PLoS Negl Trop Dis* 14, e0008729.
- 2072 Silbering, A.F., Rytz, R., Grosjean, Y., Abuin, L., Ramdya, P., Jefferis, G.S., and Benton, R.  
2073 (2011). Complementary function and integrated wiring of the evolutionarily distinct *Drosophila*  
2074 olfactory subsystems. *J Neurosci* 31, 13357-13375.

- 2075 Smallegange, R.C., Qiu, Y.T., van Loon, J.J., and Takken, W. (2005). Synergism between  
2076 ammonia, lactic acid and carboxylic acids as kairomones in the host-seeking behaviour of the  
2077 malaria mosquito *Anopheles gambiae sensu stricto* (Diptera: Culicidae). *Chem Senses* 30,  
2078 145-152.
- 2079 Smith, C.N., Smith, N., Gouck, H.K., Weidhaas, D.E., Gilbert, I.H., Mayer, M.S., Smittle, B.J.,  
2080 and Hofbauer, A. (1970). L-lactic acid as a factor in the attraction of *Aedes aegypti* (Diptera:  
2081 Culicidae) to human hosts. *Ann Entomol Soc Am* 63, 760-770.
- 2082 Stocker, R.F. (1994). The organization of the chemosensory system in *Drosophila*  
2083 *melanogaster*: a review. *Cell Tissue Res* 275, 3-26.
- 2084 Stocker, R.F., Lienhard, M.C., Borst, A., and Fischbach, K.F. (1990). Neuronal architecture of  
2085 the antennal lobe in *Drosophila melanogaster*. *Cell Tissue Res* 262, 9-34.
- 2086 Strotmann, J., Conzelmann, S., Beck, A., Feinstein, P., Breer, H., and Mombaerts, P. (2000).  
2087 Local permutations in the glomerular array of the mouse olfactory bulb. *J Neurosci* 20, 6927-  
2088 6938.
- 2089 Syed, Z., and Leal, W.S. (2007). Maxillary palps are broad spectrum odorant detectors in  
2090 *Culex quinquefasciatus*. *Chem Senses* 32, 727-738.
- 2091 Takken, W., and Kline, D.L. (1989). Carbon dioxide and 1-octen-3-ol as mosquito attractants. *J*  
2092 *Am Mosq Control Assoc* 5, 311-316.
- 2093 Tanaka, N.K., Endo, K., and Ito, K. (2012). Organization of antennal lobe-associated neurons  
2094 in adult *Drosophila melanogaster* brain. *J Comp Neurol* 520, 4067-4130.
- 2095 Task, D., Lin, C.C., Vulpe, A., Afify, A., Ballou, S., Brbić, M., Schlegel, P., Jefferis, G.S.X.E., Li,  
2096 H., Menuz, K., *et al.* (2021). Chemoreceptor co-expression in *Drosophila* olfactory neurons.  
2097 bioRxiv, DOI 10.1101/2020.1111.1107.355651.
- 2098 Tauxe, G.M., MacWilliam, D., Boyle, S.M., Guda, T., and Ray, A. (2013). Targeting a dual  
2099 detector of skin and CO<sub>2</sub> to modify mosquito host seeking. *Cell* 155, 1365-1379.
- 2100 Tawatsin, A., Thavara, U., Chansang, U., Chavalittumrong, P., Boonruad, T.,  
2101 Wongsinkongman, P., Bansidhi, J., and Mulla, M.S. (2006). Field evaluation of deet, Repel  
2102 Care, and three plant based essential oil repellents against mosquitoes, black flies (Diptera:  
2103 Simuliidae) and land leeches (Arhynchobdellida: Haemadipsidae) in Thailand. *J Am Mosq*  
2104 *Control Assoc* 22, 306-313.
- 2105 Travis, B.V., Morton, F.A., Jones, H.A., and Robinson, J.H. (1949). The more effective  
2106 mosquito repellents tested at the Orlando, Fla., laboratory, 1942-47. *J Econ Entomol* 42, 686-  
2107 694.
- 2108 Troemel, E.R., Chou, J.H., Dwyer, N.D., Colbert, H.A., and Bargmann, C.I. (1995). Divergent  
2109 seven transmembrane receptors are candidate chemosensory receptors in *C. elegans*. *Cell*  
2110 83, 207-218.

- 2111 Turner, S.L., Li, N., Guda, T., Githure, J., Carde, R.T., and Ray, A. (2011). Ultra-prolonged  
2112 activation of CO<sub>2</sub>-sensing neurons disorients mosquitoes. *Nature* 474, 87-91.
- 2113 Vassar, R., Chao, S.K., Sitcheran, R., Nunez, J.M., Vosshall, L.B., and Axel, R. (1994).  
2114 Topographic organization of sensory projections to the olfactory bulb. *Cell* 79, 981-991.
- 2115 Vidal, B., Aghayeva, U., Sun, H., Wang, C., Glenwinkel, L., Bayer, E.A., and Hobert, O. (2018).  
2116 An atlas of *Caenorhabditis elegans* chemoreceptor expression. *PLoS Biol* 16, e2004218.
- 2117 Vosshall, L.B., Amrein, H., Morozov, P.S., Rzhetsky, A., and Axel, R. (1999). A spatial map of  
2118 olfactory receptor expression in the *Drosophila* antenna. *Cell* 96, 725-736.
- 2119 Vosshall, L.B., Wong, A.M., and Axel, R. (2000). An olfactory sensory map in the fly brain. *Cell*  
2120 102, 147-159.
- 2121 Vythilingam, I., Chiang, G.L., and Chan, S.T. (1992). Evaluation of carbon dioxide and 1-octen-  
2122 3-ol as mosquito attractants. *Southeast Asian J Trop Med Public Health* 23, 328-331.
- 2123 Wagh, D.A., Rasse, T.M., Asan, E., Hofbauer, A., Schwenkert, I., Dürrbeck, H., Buchner, S.,  
2124 Dabauvalle, M.C., Schmidt, M., Qin, G., *et al.* (2006). Bruchpilot, a protein with homology to  
2125 ELKS/CAST, is required for structural integrity and function of synaptic active zones in  
2126 *Drosophila*. *Neuron* 49, 833-844.
- 2127 Wang, J.W., Wong, A.M., Flores, J., Vosshall, L.B., and Axel, R. (2003). Two-photon calcium  
2128 imaging reveals an odor-evoked map of activity in the fly brain. *Cell* 112, 271-282.
- 2129 WHO (2020). Fact sheet: Vector-borne diseases. World Health Organization, Geneva,  
2130 <https://www.who.int/en/news-room/fact-sheets/detail/vector-borne-diseases>.
- 2131 Wicher, D., Schafer, R., Bauernfeind, R., Stensmyr, M.C., Heller, R., Heinemann, S.H., and  
2132 Hansson, B.S. (2008). *Drosophila* odorant receptors are both ligand-gated and cyclic-  
2133 nucleotide-activated cation channels. *Nature* 452, 1007-1011.
- 2134 Yao, C.A., Ignell, R., and Carlson, J.R. (2005). Chemosensory coding by neurons in the  
2135 coeloconic sensilla of the *Drosophila* antenna. *J Neurosci* 25, 8359-8367.
- 2136 Ye, Y., Liu, F., Sun, H., Baker, A., and Zwiebel, L.J. (2021). Discrete roles of the *Ir76b*  
2137 Ionotropic Co-Receptor impact olfaction, blood feeding, and mating in the malaria vector  
2138 mosquito *Anopheles coluzzii*. bioRxiv, DOI 10.1101/2021.1107.1105.451160.
- 2139 Zhang, Y., Tsang, T.K., Bushong, E.A., Chu, L.A., Chiang, A.S., Ellisman, M.H., Reingruber,  
2140 J., and Su, C.Y. (2019). Asymmetric ephaptic inhibition between compartmentalized olfactory  
2141 receptor neurons. *Nat Commun* 10, 1560.
- 2142 Zhao, Z., Zung, J.L., Kriete, A.L., Iqbal, A., Younger, M.A., Matthews, B.J., Merhof, D.,  
2143 Thiberge, S., Strauch, M., and McBride, C.S. (2020). Chemical signatures of human odour  
2144 generate a unique neural code in the brain of *Aedes aegypti* mosquitoes. bioRxiv,  
2145 10.1101/2020.1111.1101.363861.

2146 Zou, D.J., Chesler, A., and Firestein, S. (2009). How the olfactory bulb got its glomeruli: a just  
2147 so story? *Nat Rev Neurosci* *10*, 611-618.  
2148

2149  
2150

## Figure S1

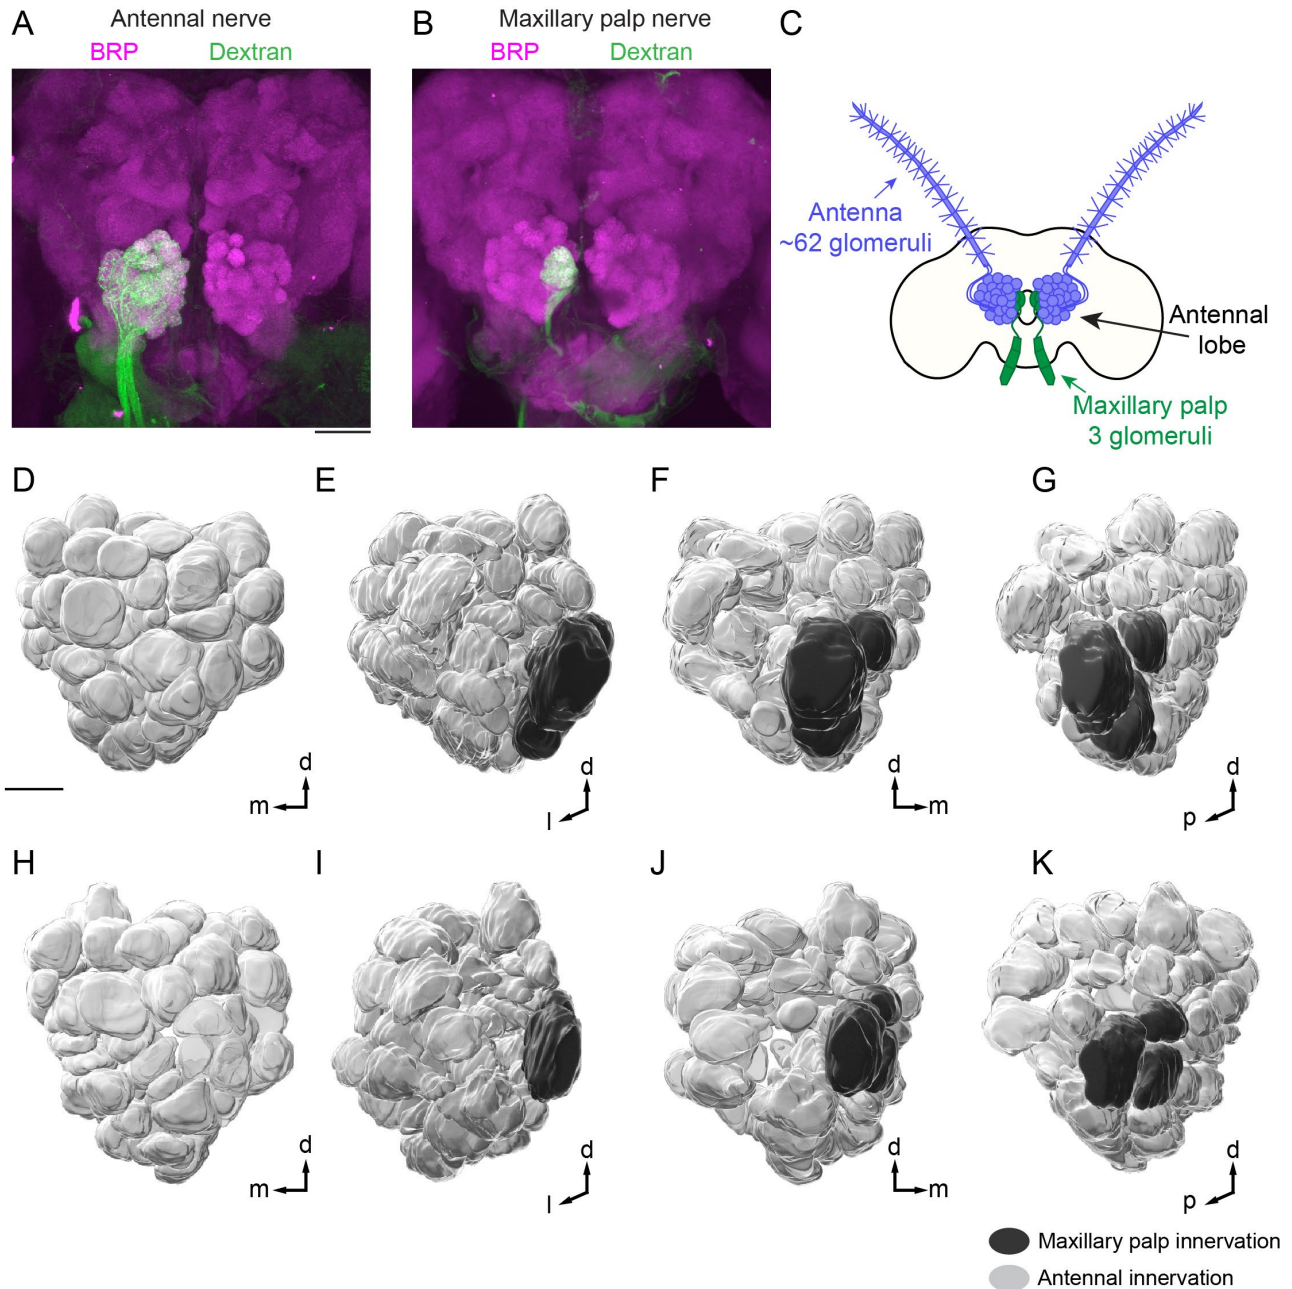

2152  
2153  
2154  
2155  
2156  
2157  
2158  
2159  
2160  
2161  
2162

**Figure S1. Organization of *Aedes aegypti* antennal lobe glomeruli (Related to Figure 1)**  
(A-B) Maximum-intensity projections of confocal Z-stacks of a brain after anterograde dye fill of a single ipsilateral antenna (A) or ipsilateral maxillary palp (B) using a dextran-conjugated fluorophore (green) with immunofluorescent labeling of Brp (synaptic marker, magenta). (C) Approximate number of antennal lobe glomeruli per brain hemisphere innervated by the indicated sensory structure, derived from quantification of the left antennal lobe in 12 brains presented in Figure 11-J, Figure S2-S5. (D-K) 3-D reconstruction of a single left antennal lobe with 61 (D-G) or 66 (H-K) glomeruli shown at 4 different angles. Glomeruli are colored according to innervation by the indicated sensory appendage. Panel (G) is reprinted in Figure 5B. Scale bars: 50 μm (A-B), 20 μm (D-K). Orientation: d=dorsal, m=medial, p=posterior.

2163  
2164

## Figure S2

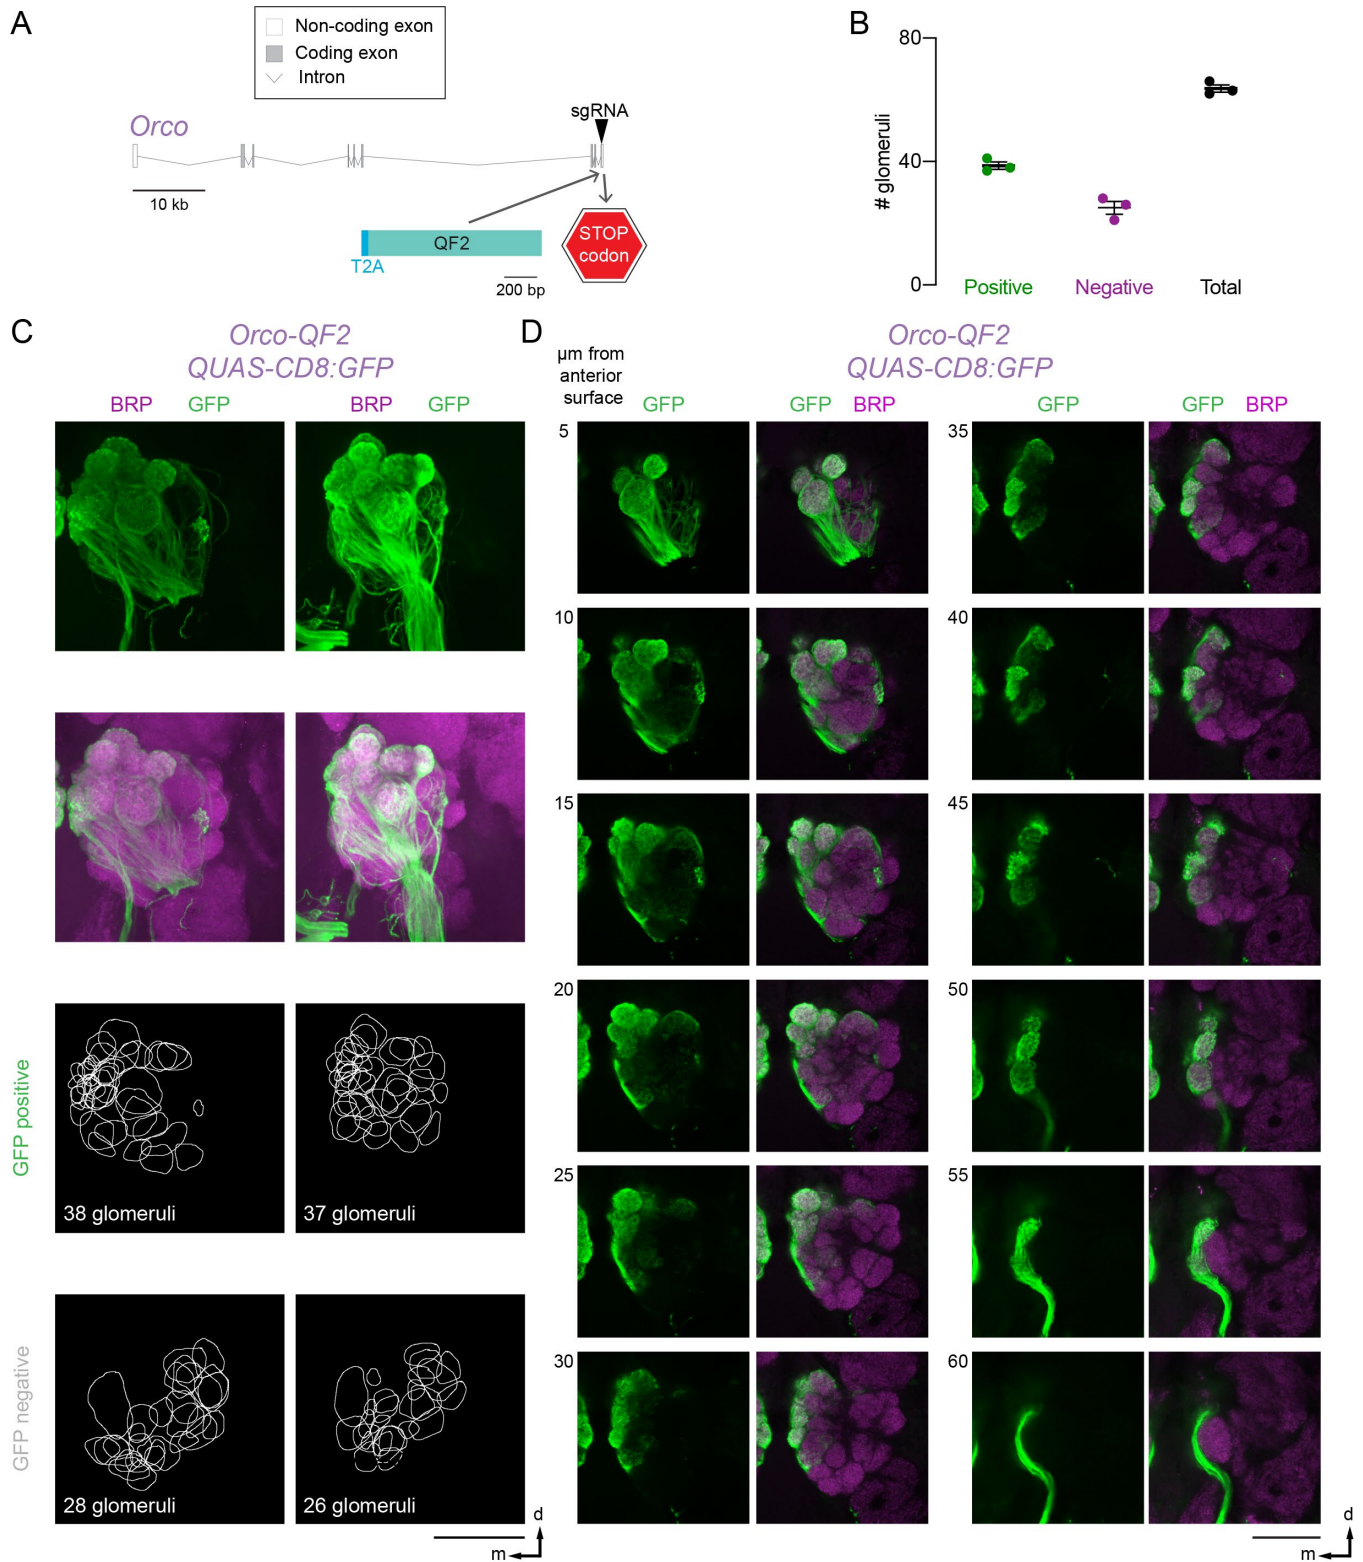

2166  
2167

2168 **Figure S2. Projections of *Orco-QF2*-expressing neurons in the antennal lobe (Related to**  
2169 **Figure 1)**  
2170 **(A)** *Orco* locus with exons (grey boxes), introns (grey lines) and CRISPR-Cas9 gRNA site  
2171 (arrowhead) used to insert T2A-QF2 (light blue). **(B)** Quantification of the number of glomeruli  
2172 that are GFP positive (green), GFP negative (magenta), and total number of glomeruli (black).  
2173 Analysis based on brains in (C-D) and **Figure 1I,J**. **(C)** Maximum-intensity projections of  
2174 confocal Z-stacks of left antennal lobes from two different brains of the indicated genotype with  
2175 immunofluorescent labeling of GFP (green) and Brp (synaptic marker, magenta) (top) and 2-D  
2176 representation of the boundary of each glomerulus that is GFP positive and GFP negative  
2177 (bottom). **(D)** Single confocal sections taken from the maximum-intensity projection confocal Z-  
2178 stack of the left antennal lobe shown in **Figure 1I** with immunofluorescent labeling of GFP  
2179 (green) and Brp (synaptic marker, magenta). A single plane is shown every 5  $\mu\text{m}$  in Z to  
2180 capture each glomerulus. Scale bar (C-D): 50  $\mu\text{m}$ . Orientation: d=dorsal, m=medial.



2181  
2182

## Figure S3

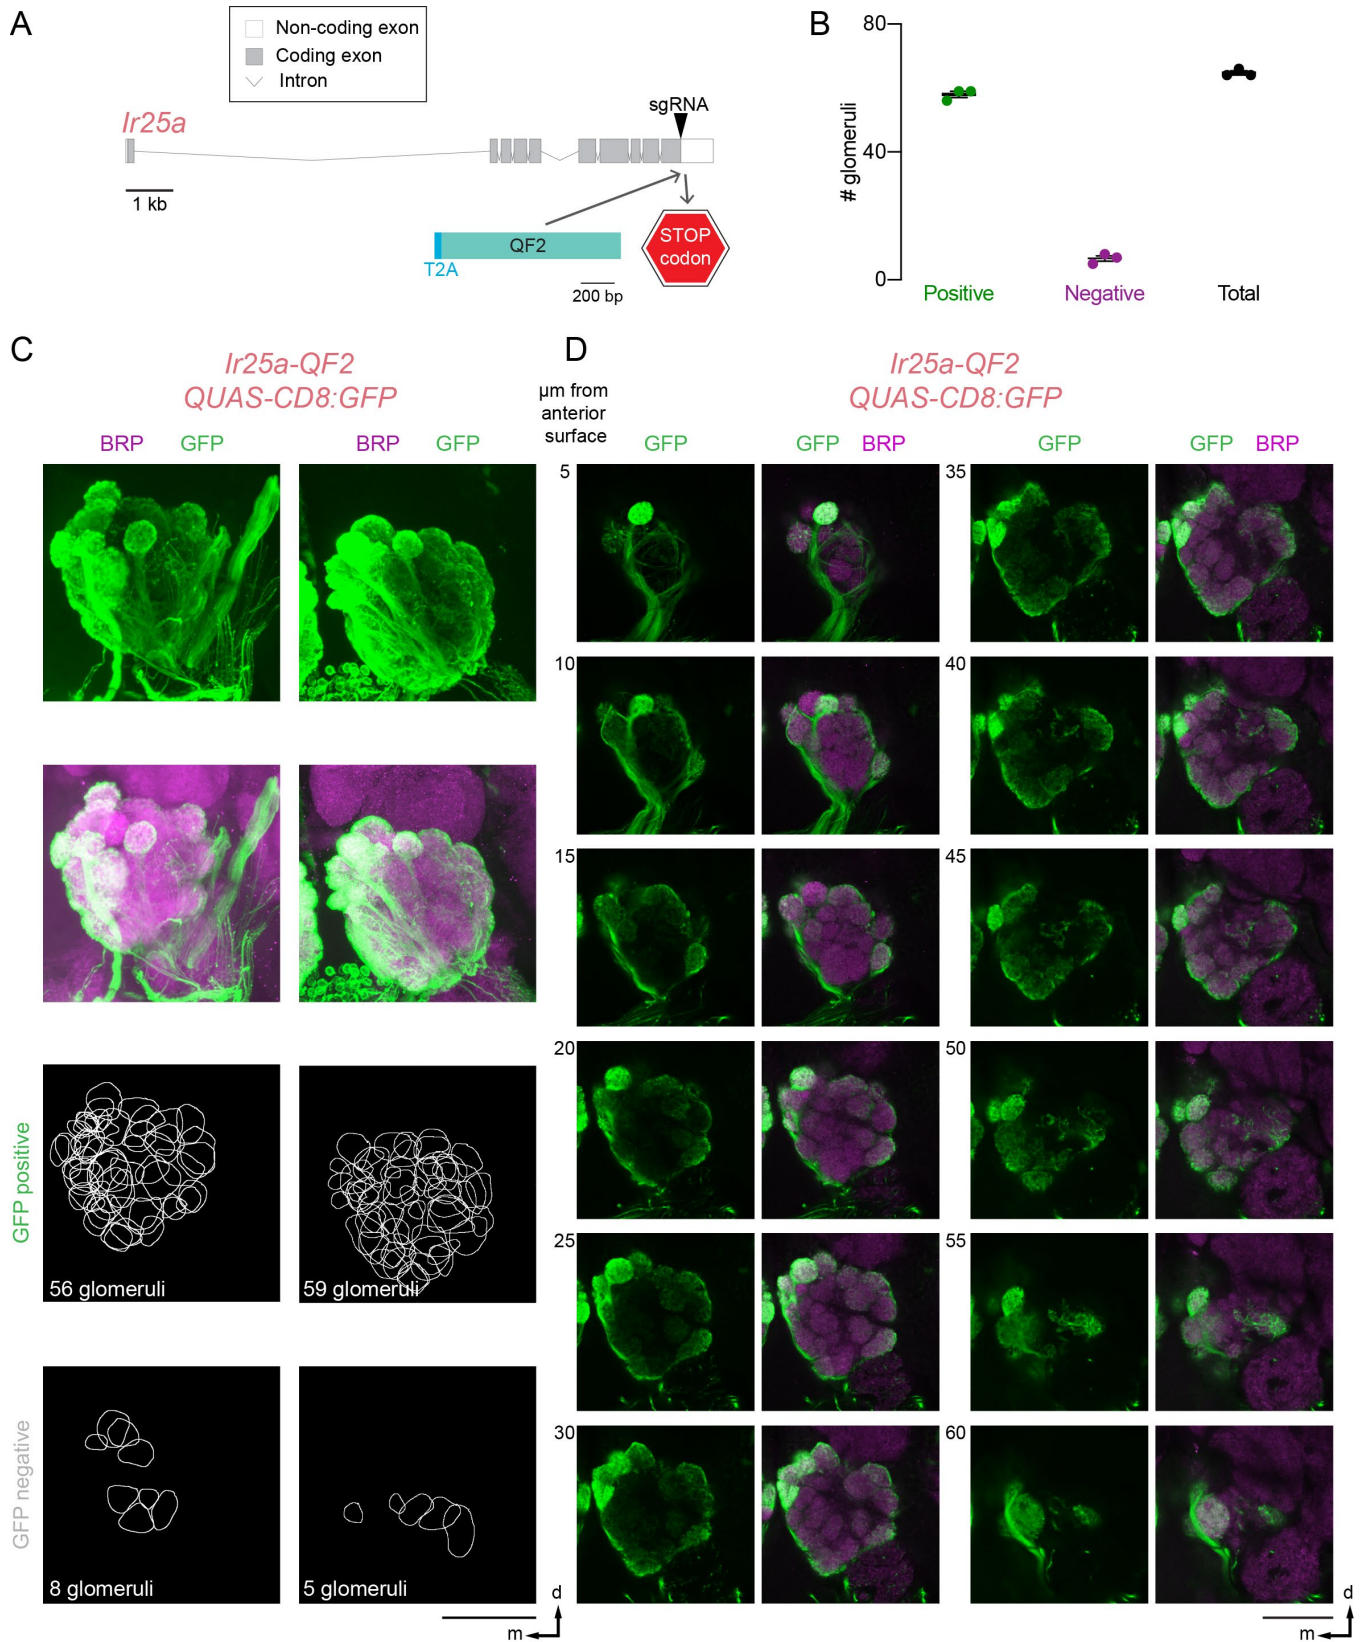

2184 **Figure S3: Projections of *Ir25a-QF2*-expressing neurons in the antennal lobe (Related to**  
2185 **Figure 1) (A)** *Ir25a* locus with exons (grey boxes), introns (grey lines) and CRISPR-Cas9  
2186 gRNA site (arrowhead) used to insert T2A-QF2 (light blue). **(B)** Quantification of the number of  
2187 glomeruli that are GFP positive (green), GFP negative (magenta), and total number of  
2188 glomeruli (black). Analysis based on brains in (C-D) and **Figure 1I,J**. **(C)** Maximum-intensity  
2189 projections of confocal Z-stacks of left antennal lobes from two different brains of the indicated  
2190 genotype with immunofluorescent labeling of GFP (green) and Brp (synaptic marker, magenta)  
2191 (top) and 2-D representation of the boundary of each glomerulus that is GFP positive and GFP  
2192 negative (bottom). **(D)** Single confocal sections taken from the maximum-intensity projection  
2193 confocal Z-stack of the left antennal lobe shown in **Figure 1I** with immunofluorescent labeling  
2194 of GFP (green) and Brp (synaptic marker, magenta). A single plane is shown every 5  $\mu\text{m}$  in Z  
2195 to capture each glomerulus. Scale bar (C-D): 50  $\mu\text{m}$ . Orientation: d=dorsal, m=medial.

2196  
2197

## Figure S4

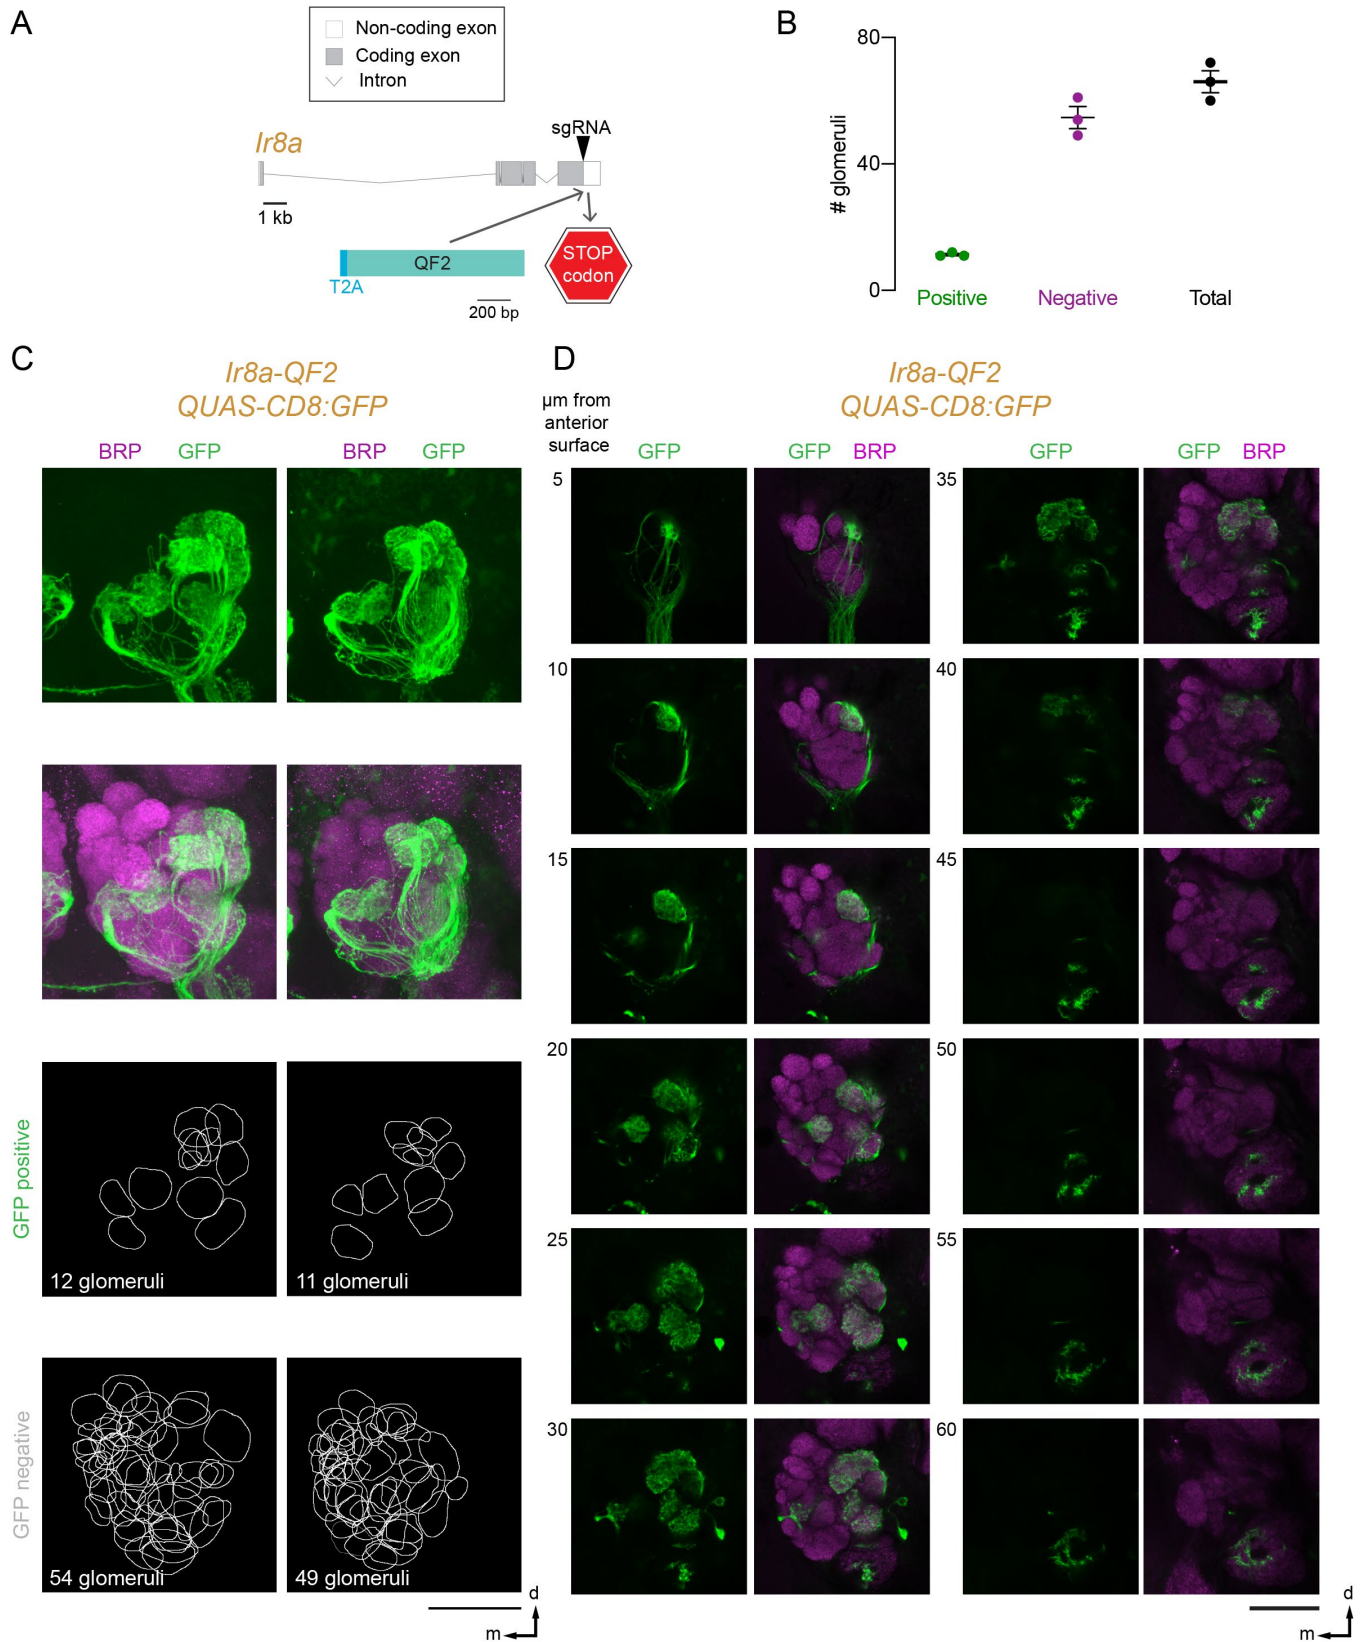

2199 **Figure S4: Projections of *Ir8a*-QF2-expressing neurons in the antennal lobe (Related to**  
2200 **Figure 1) (A)** *Ir8a* locus with exons (grey boxes), introns (grey lines) and CRISPR-Cas9 gRNA  
2201 site (arrowhead) used to insert T2A-QF2 (light blue). **(B)** Quantification of the number of  
2202 glomeruli that are GFP positive (green), GFP negative (magenta), and total number of  
2203 glomeruli (black). Analysis based on brains in (C-D) and **Figure 1I,J**. **(C)** Maximum-intensity  
2204 projections of confocal Z-stacks of left antennal lobes from two different brains of the indicated  
2205 genotype with immunofluorescent labeling of GFP (green) and Brp (synaptic marker, magenta)  
2206 (top) and 2-D representation of the boundary of each glomerulus that is GFP positive and GFP  
2207 negative (bottom). **(D)** Single confocal sections taken from the maximum-intensity projection  
2208 confocal Z-stack of the left antennal lobe shown in **Figure 1I** with immunofluorescent labeling  
2209 of GFP (green) and Brp (synaptic marker, magenta). A single plane is shown every 5  $\mu\text{m}$  in Z  
2210 to capture each glomerulus. Scale bar (C-D): 50  $\mu\text{m}$ . Orientation: d=dorsal, m=medial.

2211  
2212

## Figure S5

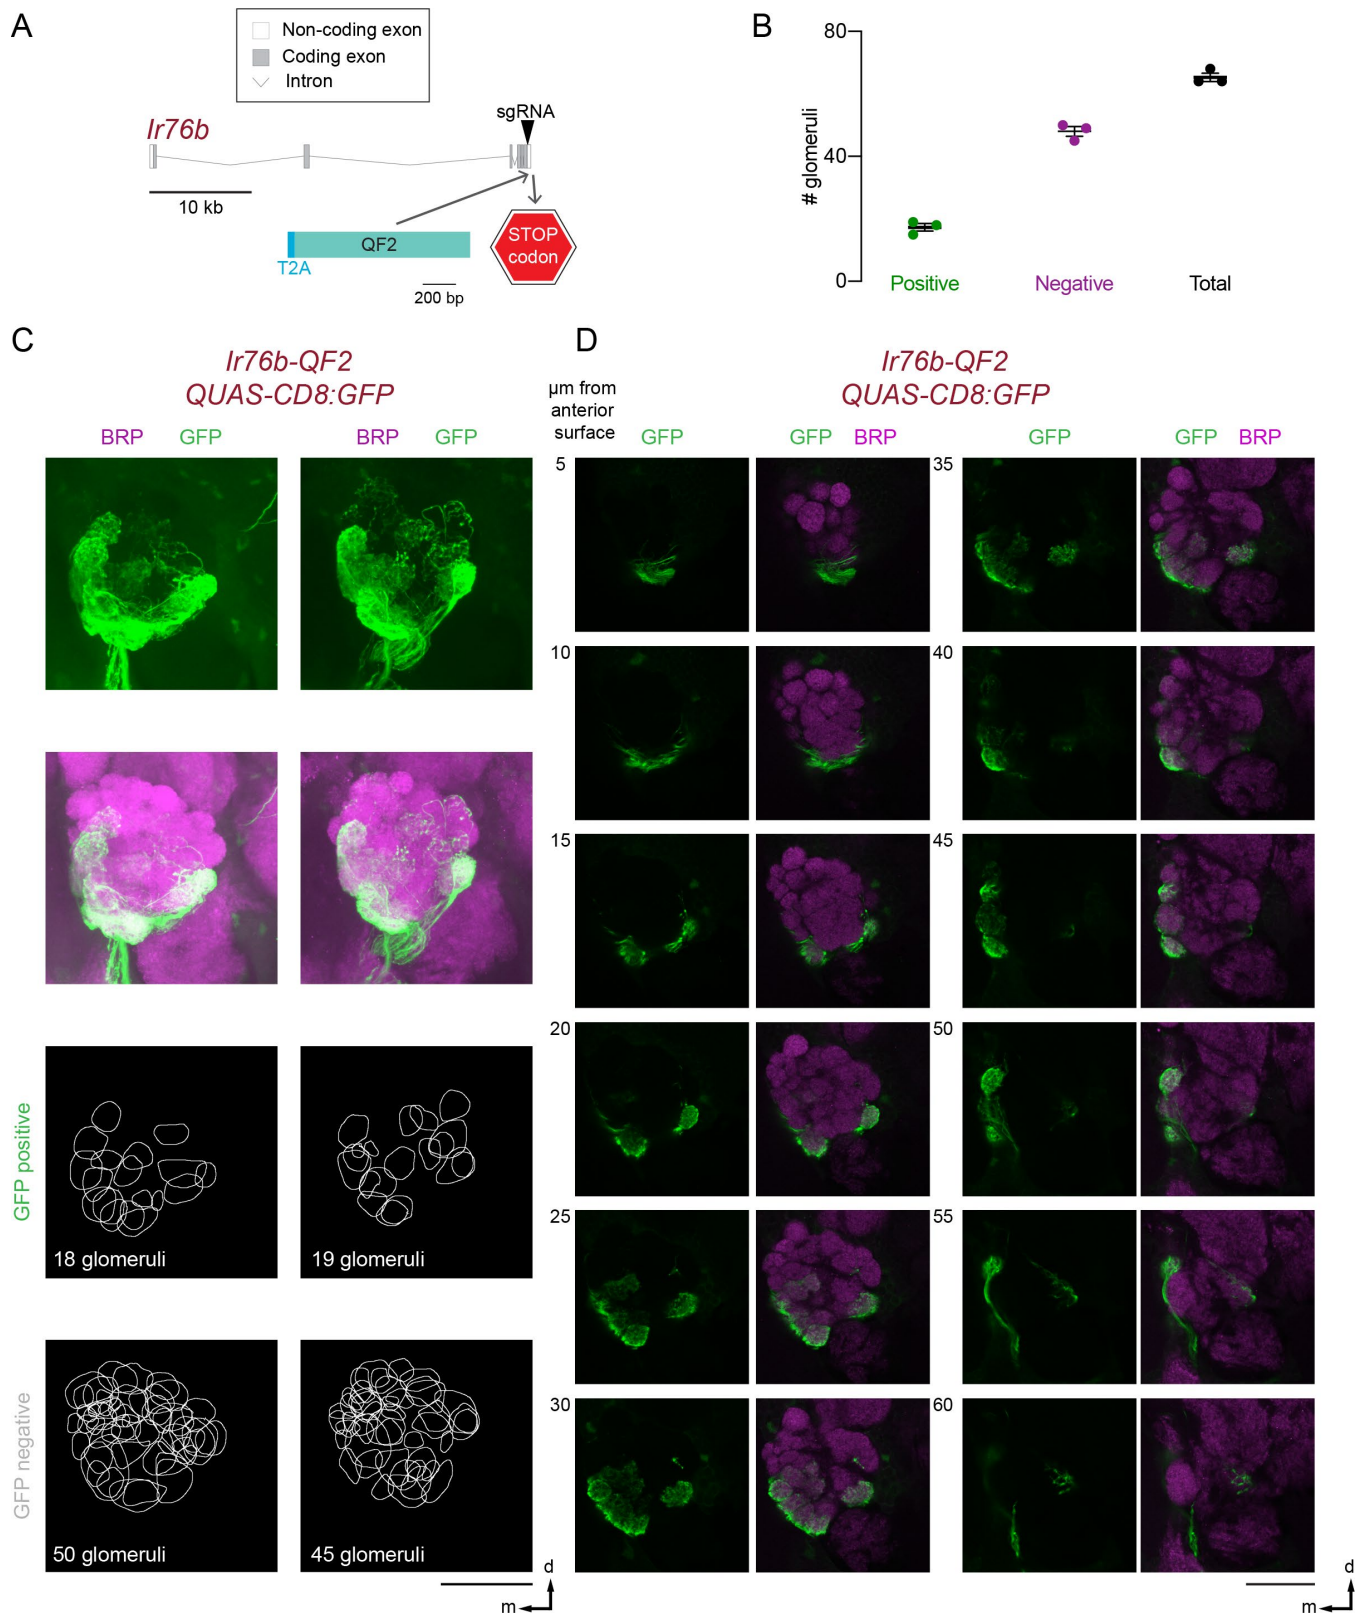

2214

2215 **Figure S5: Projections of *Ir76b*-QF2-expressing neurons in the antennal lobe (Related to**  
2216 **Figure 1) (A)** *Ir76b* locus with exons (grey boxes), introns (grey lines) and CRISPR-Cas9  
2217 gRNA site (arrowhead) used to insert T2A-QF2 (light blue). **(B)** Quantification of the number of  
2218 glomeruli that are GFP positive (green), GFP negative (magenta), and total number of  
2219 glomeruli (black). Analysis based on brains in (C-D) and **Figure 1I,J**. **(C)** Maximum-intensity  
2220 projections of confocal Z-stacks of left antennal lobes from two different brains of the indicated  
2221 genotype with immunofluorescent labeling of GFP (green) and Brp (synaptic marker, magenta)  
2222 (top) and 2-D representation of the boundary of each glomerulus that is GFP positive and GFP  
2223 negative (bottom). **(D)** Single confocal sections taken from the maximum-intensity projection  
2224 confocal Z-stack of the left antennal lobe shown in **Figure 1I** with immunofluorescent labeling  
2225 of GFP (green) and Brp (synaptic marker, magenta). A single plane is shown every 5  $\mu\text{m}$  in Z  
2226 to capture each glomerulus. Scale bar (C-D): 50  $\mu\text{m}$ . Orientation: d=dorsal, m=medial.

2227  
2228

## Figure S6

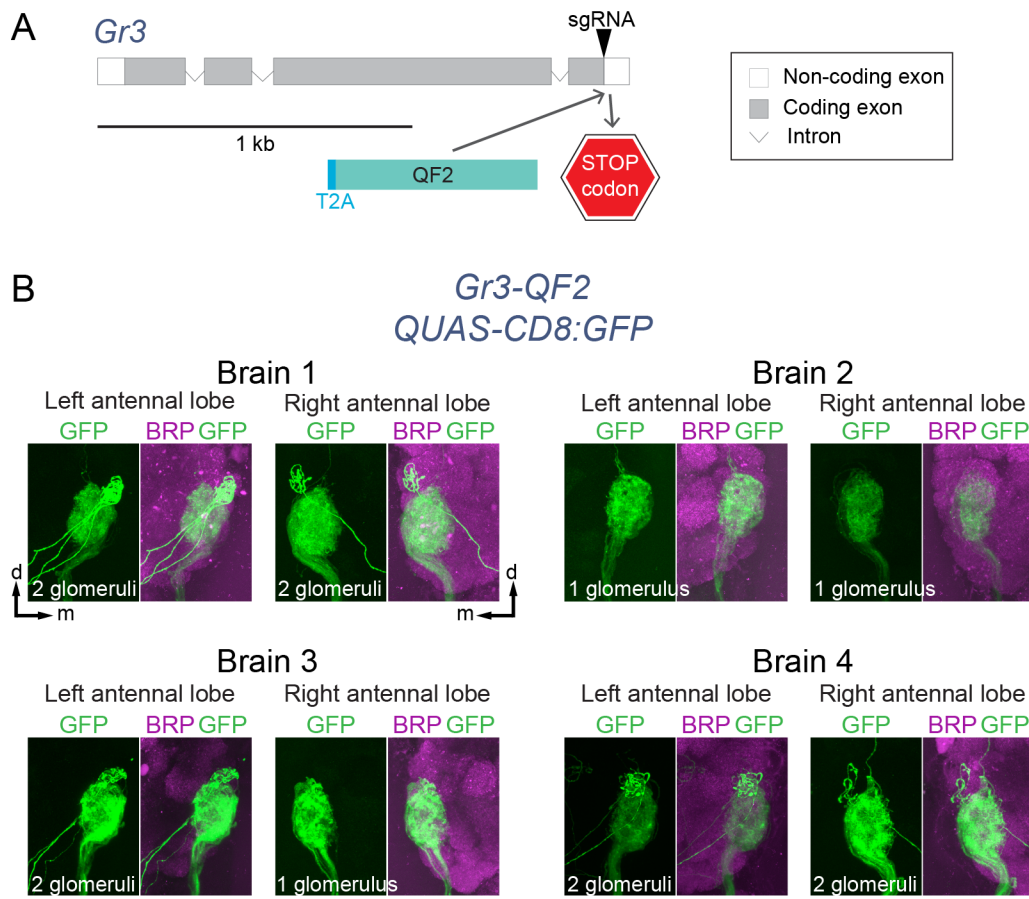

2230  
2231  
2232  
2233  
2234  
2235  
2236

**Figure S6. Projections of *Gr3-QF2*-expressing neurons in the antennal lobe (Related to Figure 1)** (A) *Gr3* locus with exons (grey boxes), introns (grey lines) and CRISPR-Cas9 gRNA site (arrowhead) used to insert T2A-QF2 (light blue). (B) Maximum-intensity projection confocal Z-stack through the medial antennal lobes of 4 brains with immunofluorescent labeling of GFP (green) and Brp (synaptic marker, magenta). Scale bar: 25  $\mu$ m. Orientation: d=dorsal, m=medial.

2237  
2238

## Figure S7

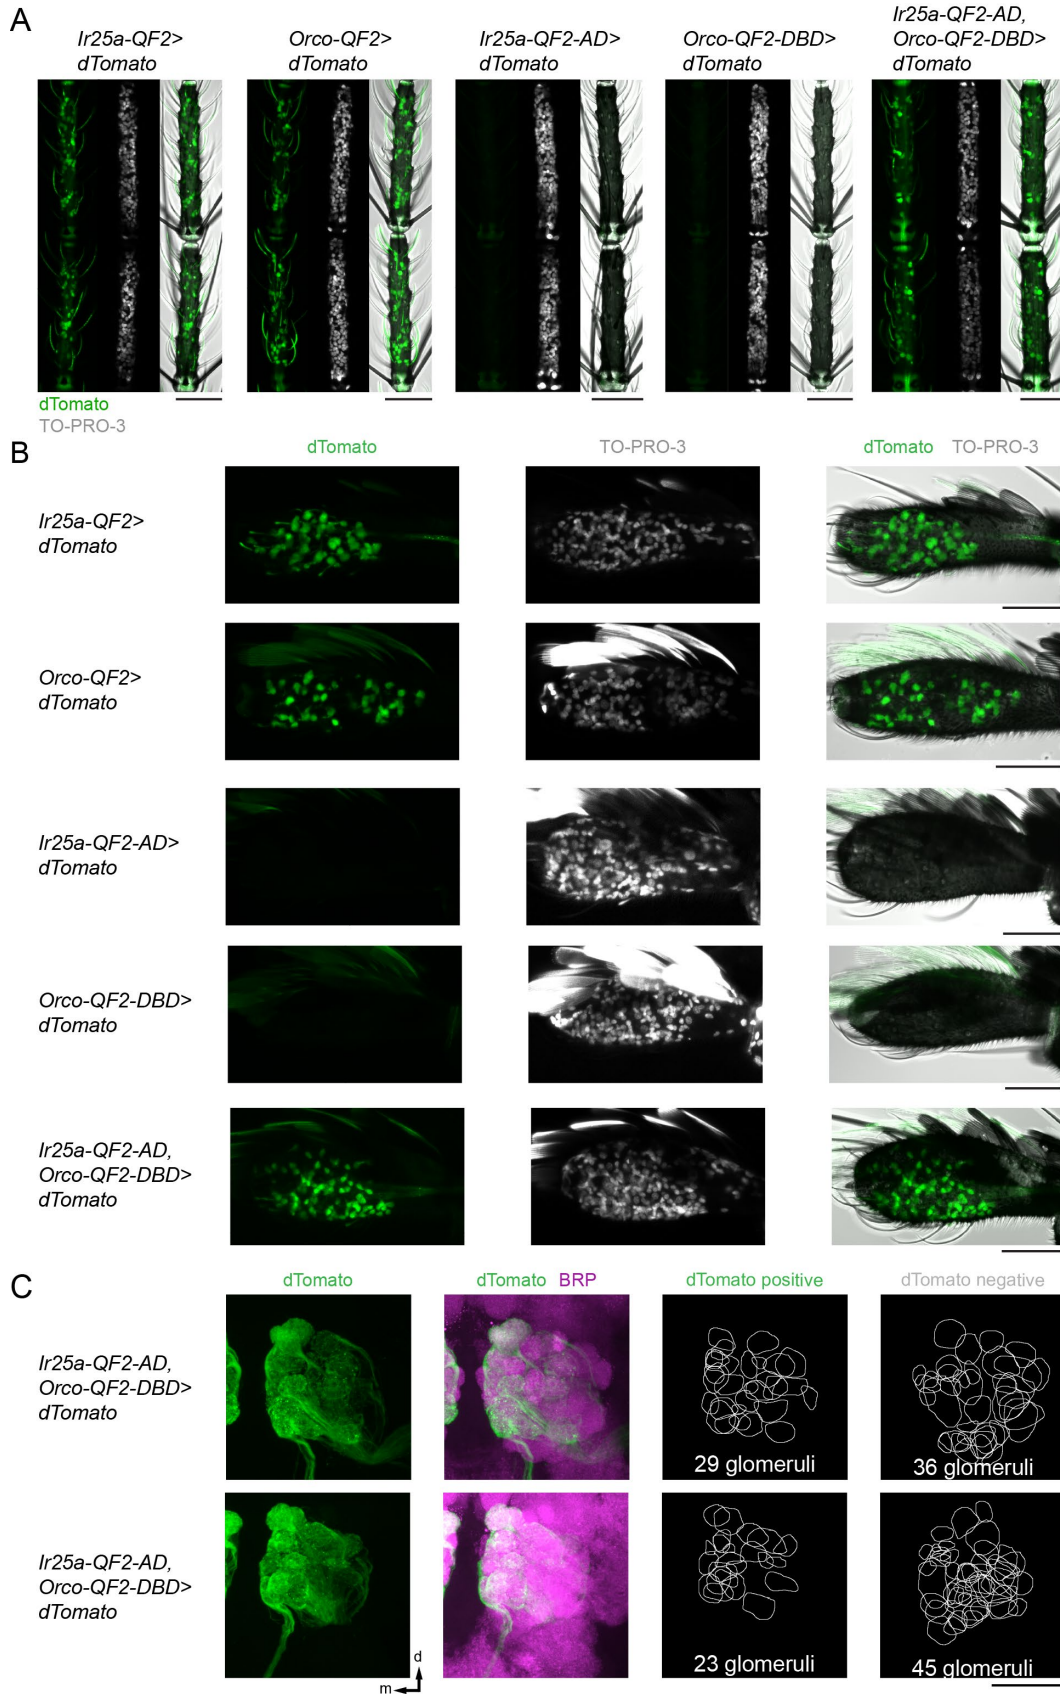



2240 **Figure S7. Specificity of Split-QF2 reagents (Related to Figure 2)**  
2241 **(A-B)** Maximum-intensity projections of confocal Z-stacks of antennae (A) and maxillary palps  
2242 (B) of the indicated genotypes showing intrinsic dTomato fluorescence and stained with the  
2243 nuclear dye TO-PRO-3, with transmitted light overlay. **(C)** Maximum-intensity projections of  
2244 confocal Z-stacks of left antennal lobes from two different brains of the indicated genotype with  
2245 immunofluorescent labeling of dTomato (green) and Brp (synaptic marker, magenta) (top) and  
2246 2-D representation of the boundary of each glomerulus that is GFP positive and GFP negative  
2247 (bottom). Scale bars: 50  $\mu$ m. Orientation (C,D): d=dorsal, m=medial.

2248  
2249

## Figure S8

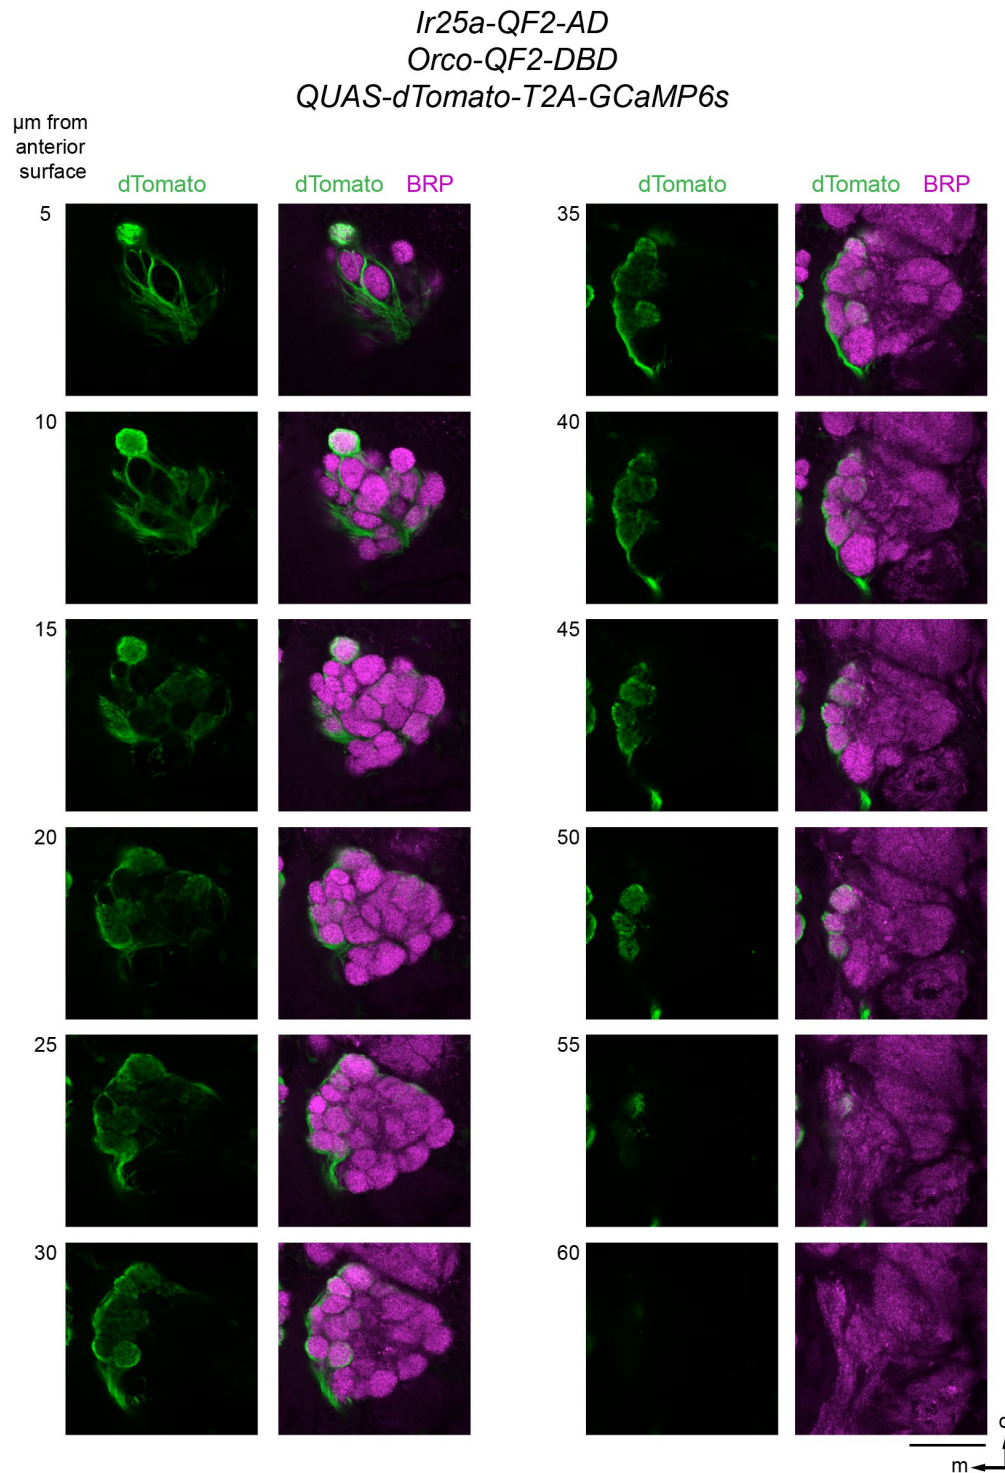

2251 **Figure S8. Projections of *Orco-QF2-DBD*; *Ir25a-QF2-AD*-expressing neurons in a single**  
2252 **antennal lobe (Related to Figure 2)** Single confocal sections taken from the maximum-  
2253 intensity projection confocal Z-stack of the left antennal lobe shown in **Figure 2G** with  
2254 immunofluorescent labeling of dTomato (green) and Brp (synaptic marker, magenta). A single  
2255 plane is shown every 5 µm in Z to capture each glomerulus. Scale bar: 50 µm. Orientation:  
2256 d=dorsal, m=medial.

2257  
2258

## Figure S9

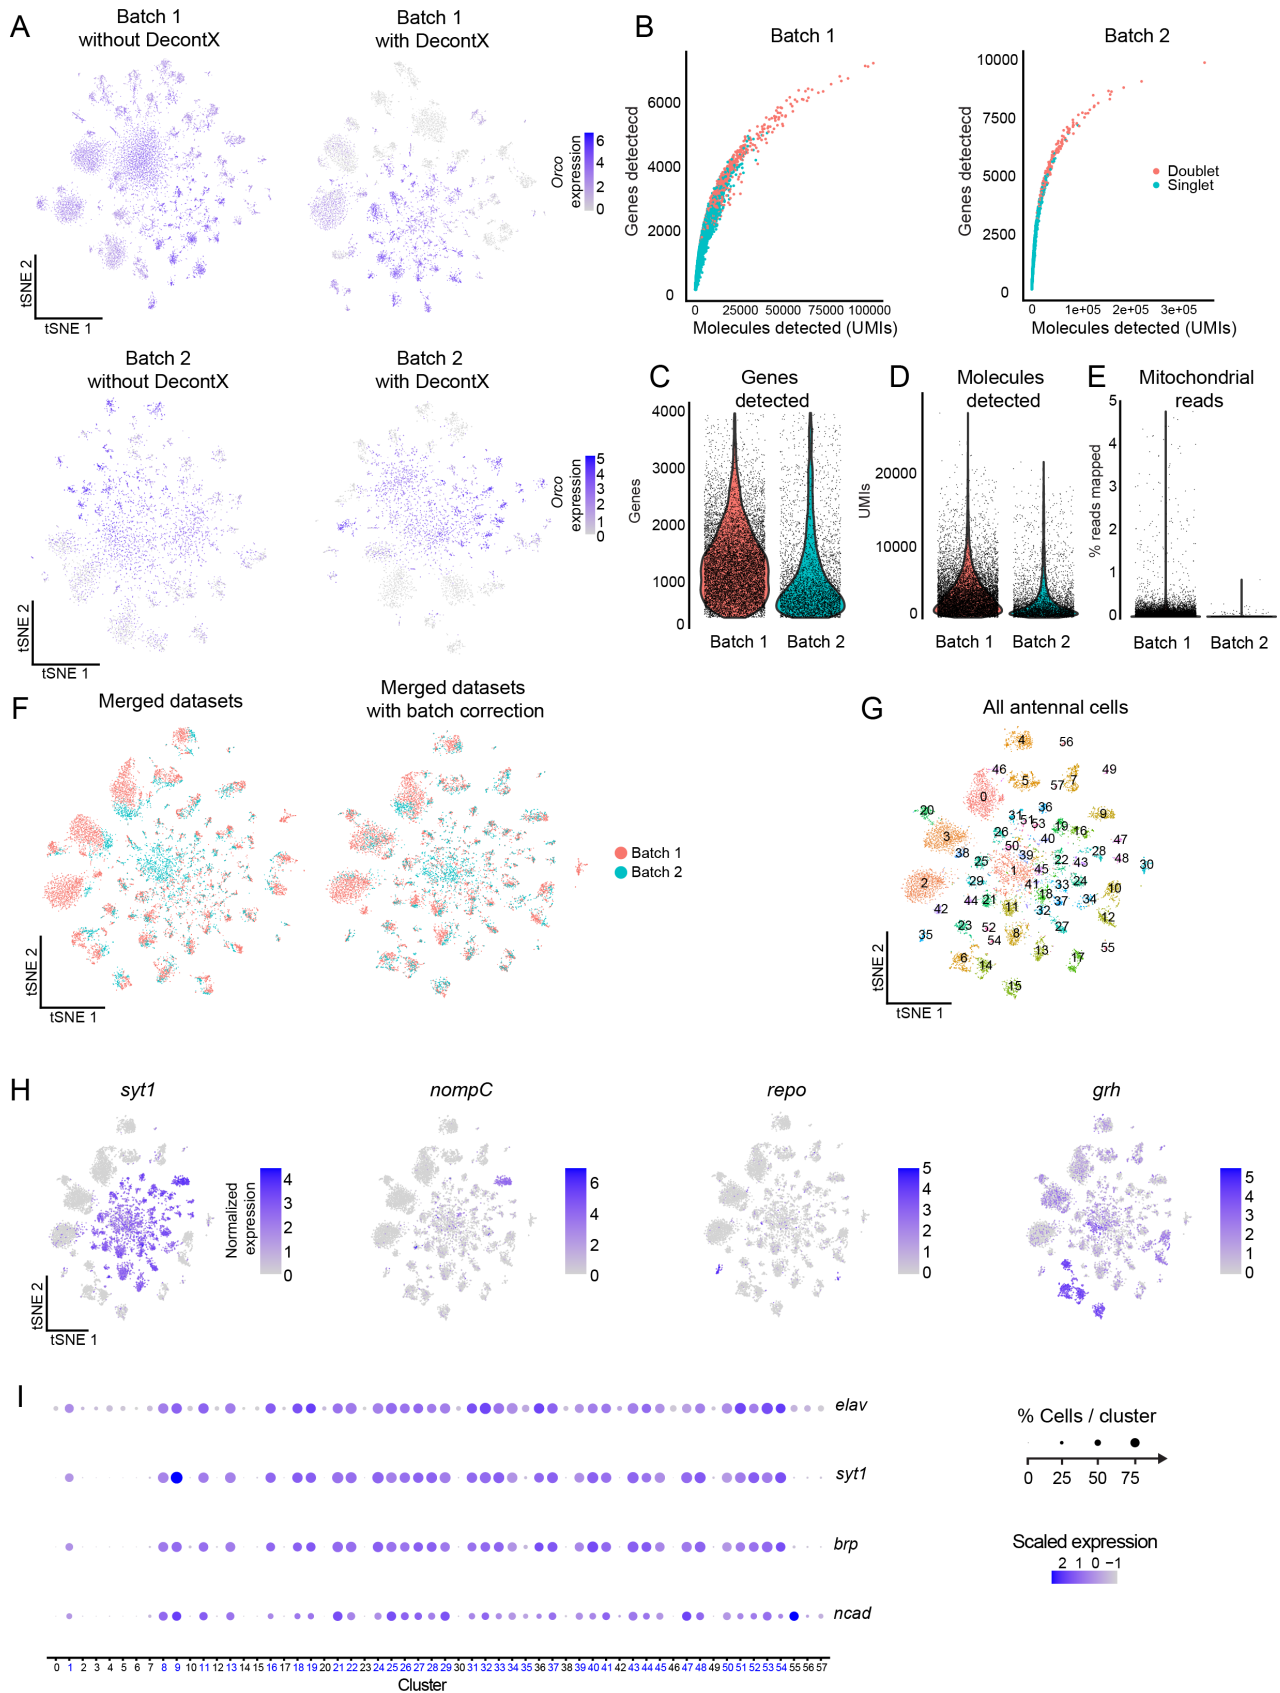

2260 **Figure S9: Antennal snRNA-seq ambient RNA removal, filtering, batch correction and**  
2261 **neuron-identification (Related to Figure 5)**  
2262 (A) Ambient RNA removal using DecontX was used independently on data from snRNA-seq  
2263 experiments processed at Rockefeller (Batch 1) and Baylor (Batch 2), illustrated using  
2264 normalized expression of *Orco* mapped onto t-distributed stochastic neighbor embedding (t-  
2265 SNE) plots. Normalized Expression:  $\log(\text{UMI of gene} \times 10,000 / \text{total UMI of cell} + 1)$ . (B)  
2266 Identification of multiplets for removal using DoubletFinder. Pearson Correlation coefficient of  
2267 genes and counts was 0.89 for Batch 1 and 0.82 for Batch 2. (C-E) Sample properties and  
2268 distributions after filtering with DecontX. Nuclei that were retained expressed between 400 and  
2269 40000 genes (C) and fewer than 5% mitochondrial transcripts (E). Nuclei were not additionally  
2270 filtered on UMIs after multiplet removal (D). (F) Independently collected snRNA-seq  
2271 experiments were merged and batch effects reduced. (G) Antennal cell clusters after batch  
2272 effect reduction, visualized using t-SNE. (H) Normalized expression [ $\log(\text{UMI of gene} \times 10,000 /$   
2273  $\text{total UMI of cell} + 1)$ ] mapped onto t-SNE plots for *syt1* as a marker for neurons, *nompC* for  
2274 mechanosensory cells, *repo* for glial cells, and *grh* for epithelial cells. (I) Dot plot of neural  
2275 markers used to identify neuron clusters. Clusters were identified as neurons if over 50% of  
2276 cells within a cluster expressed 3 out of 4 neural markers (*elav*, *syt1*, *brp*, *ncad*). The 19  
2277 neuron clusters that were identified are labeled in blue. Mean scaled expression in cluster: Z-  
2278 score.

2279  
2280

## Figure S10

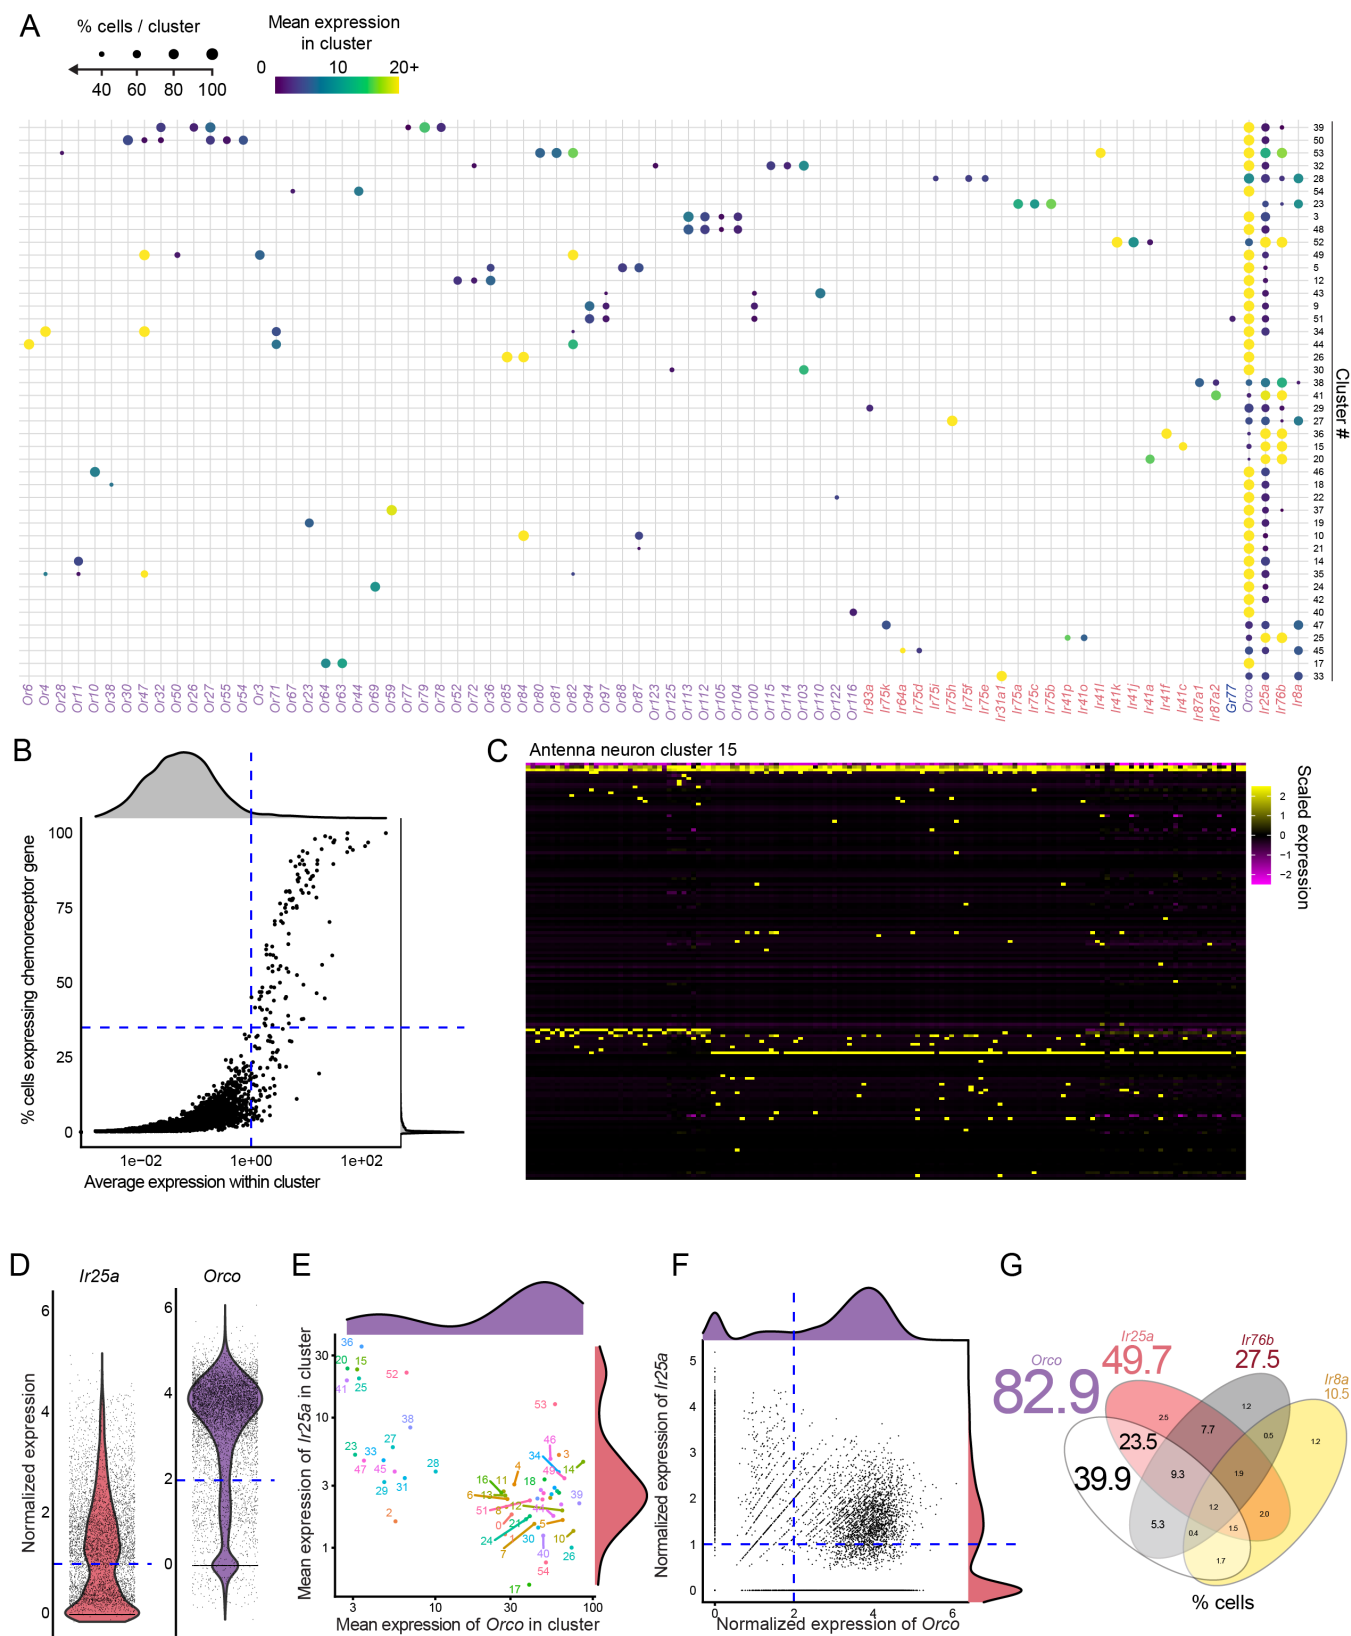

2282 **Figure S10: Antennal snRNA-seq cluster chemosensory receptor expression analysis**  
2283 **and co-receptor analysis (Related to Figure 5)**  
2284 **(A)** Dot plot summarizing chemosensory receptor expression in neuron clusters. The circle  
2285 size represents the % of cells in each cluster that express a given gene above criteria  
2286 illustrated in (B). **(B)** Distribution of chemosensory receptor genes within clusters used for  
2287 thresholding in the dot plot in (A). Points denote expression patterns of individual  
2288 chemosensory receptor genes listed on x-axis of (B) for each cluster. Lines indicate mean  
2289 normalized expression level of 1 within cells of the cluster and 35% of cells expressing a  
2290 chemosensory receptor gene in a cluster. Genes in upper and lower right hand-quadrant was  
2291 included for depiction in the dot plot (B). **(C)** Example co-expression heatmap of 148 cells  
2292 within antenna neuron cluster 15, demonstrating distinct combinations of chemosensory  
2293 receptor expression in groups of cells within one cluster. Scaled expression: Z-score. **(D-G)**  
2294 Co-expression of chemosensory co-receptors. To determine co-expression, a normalized  
2295 expression threshold of  $\log(\text{UMI of gene} \times 10,000 / \text{total UMI of cell} + 1)$  was used for *Ir25a*,  
2296 *Ir76b*, *Ir8a*. Due to higher expression levels, a threshold of  $2 \log(\text{UMI of gene} \times 10,000 / \text{total}$   
2297  $\text{UMI of cell} + 1)$  was used for *Orco* (D). Scatter plots of *Orco* and *Ir25a* expression within  
2298 neuron clusters (E) and individual cells (F). Venn diagram depicting percent of neurons co-  
2299 expressing different combinations of co-receptors according to normalized expression [ $\log(\text{UMI}$   
2300  $\text{of gene} \times 10,000 / \text{total UMI of cell} + 1)$ ]. Larger numbers outside of the Venn diagram indicate  
2301 total percent of neurons expressing indicated co-receptor (G).

2302  
2303

## Figure S11

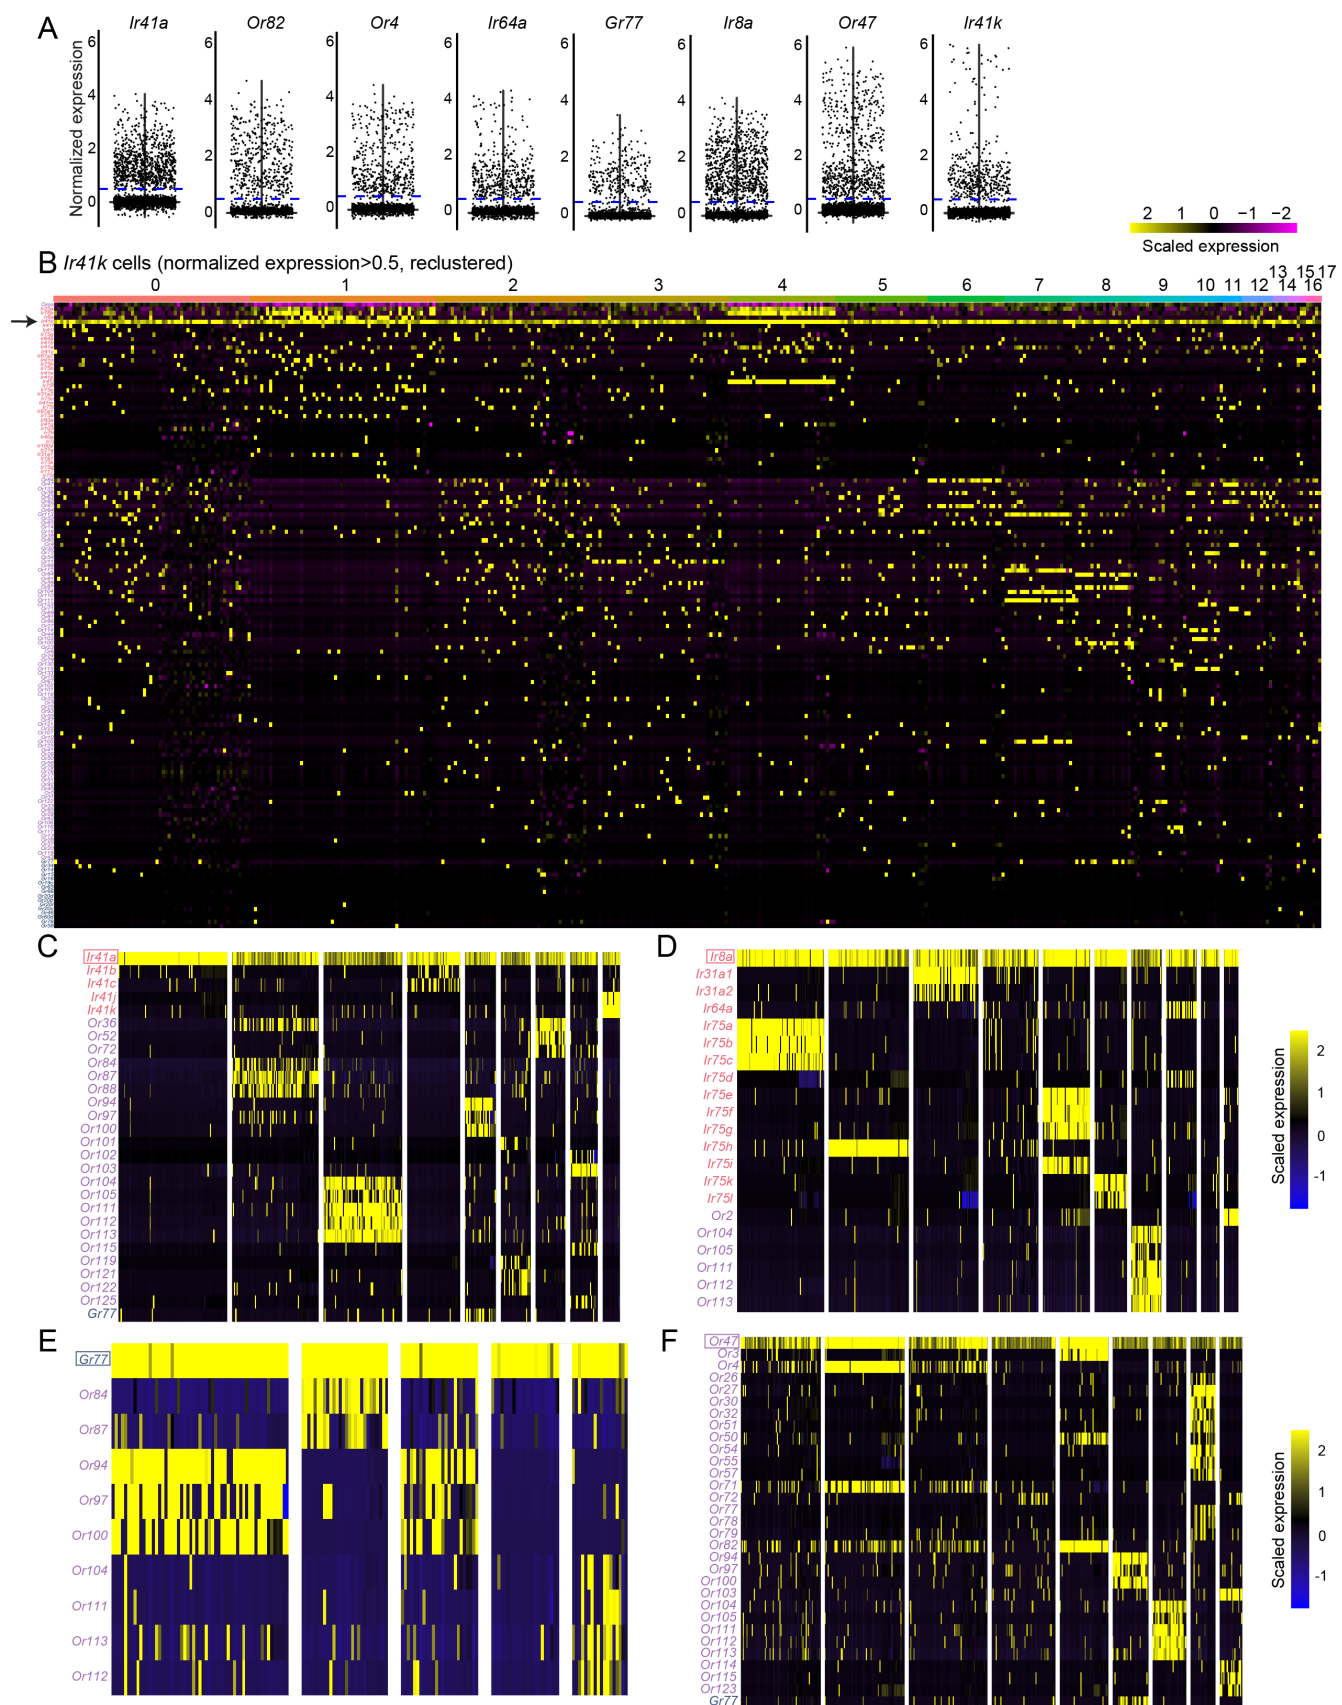

2305 **Figure S11: Antennal snRNA-seq cluster chemosensory receptor expression analysis**  
2306 **and co-receptor analysis (Related to Figure 5)**

2307 (A) Violin plots illustrating the expression distribution of selected genes used for co-expression  
2308 simplified heatmaps in [Figure 5F-I](#) and this figure. Normalized Expression:  $\log(\text{UMI of gene} \times 10,000 / \text{total UMI of cell} + 1)$ , (C-F). A normalized expression threshold of 0.5  $\log(\text{UMI of gene} \times 10,000 / \text{total UMI of cell} + 1)$  used to identify cells expressing a given chemosensory  
2310 receptor (indicated by dotted blue line). (B) Example co-expression heatmap of 412 cells with  
2311 *Ir41k* as filtered in (A). Columns represent individual cells, sorted by clustering. Rows  
2312 represent chemosensory receptor genes, ordered first by chemosensory receptor family, then  
2313 mean expression level in cluster 0. Cells from clusters 2, 3, 4, 6, 7, and 8 were selected as  
2314 illustrating examples of co-expression for simplified heatmap visualization in [Figure 5F](#). Genes  
2315 were selected manually based on expression level and number of cells exhibiting a given co-  
2316 expression pattern. Scaled expression: Z-score. (C-F) Simplified heatmaps illustrating co-  
2317 expression patterns for (C) *Ir41a*, (D) *Ir8a*, (E) *Gr77*, and (F) *Or47* using selected cells and  
2318 visually-identified genes via clustering similar to (C). Scaled expression: Z-score.  
2319



2320  
2321

## Figure S12

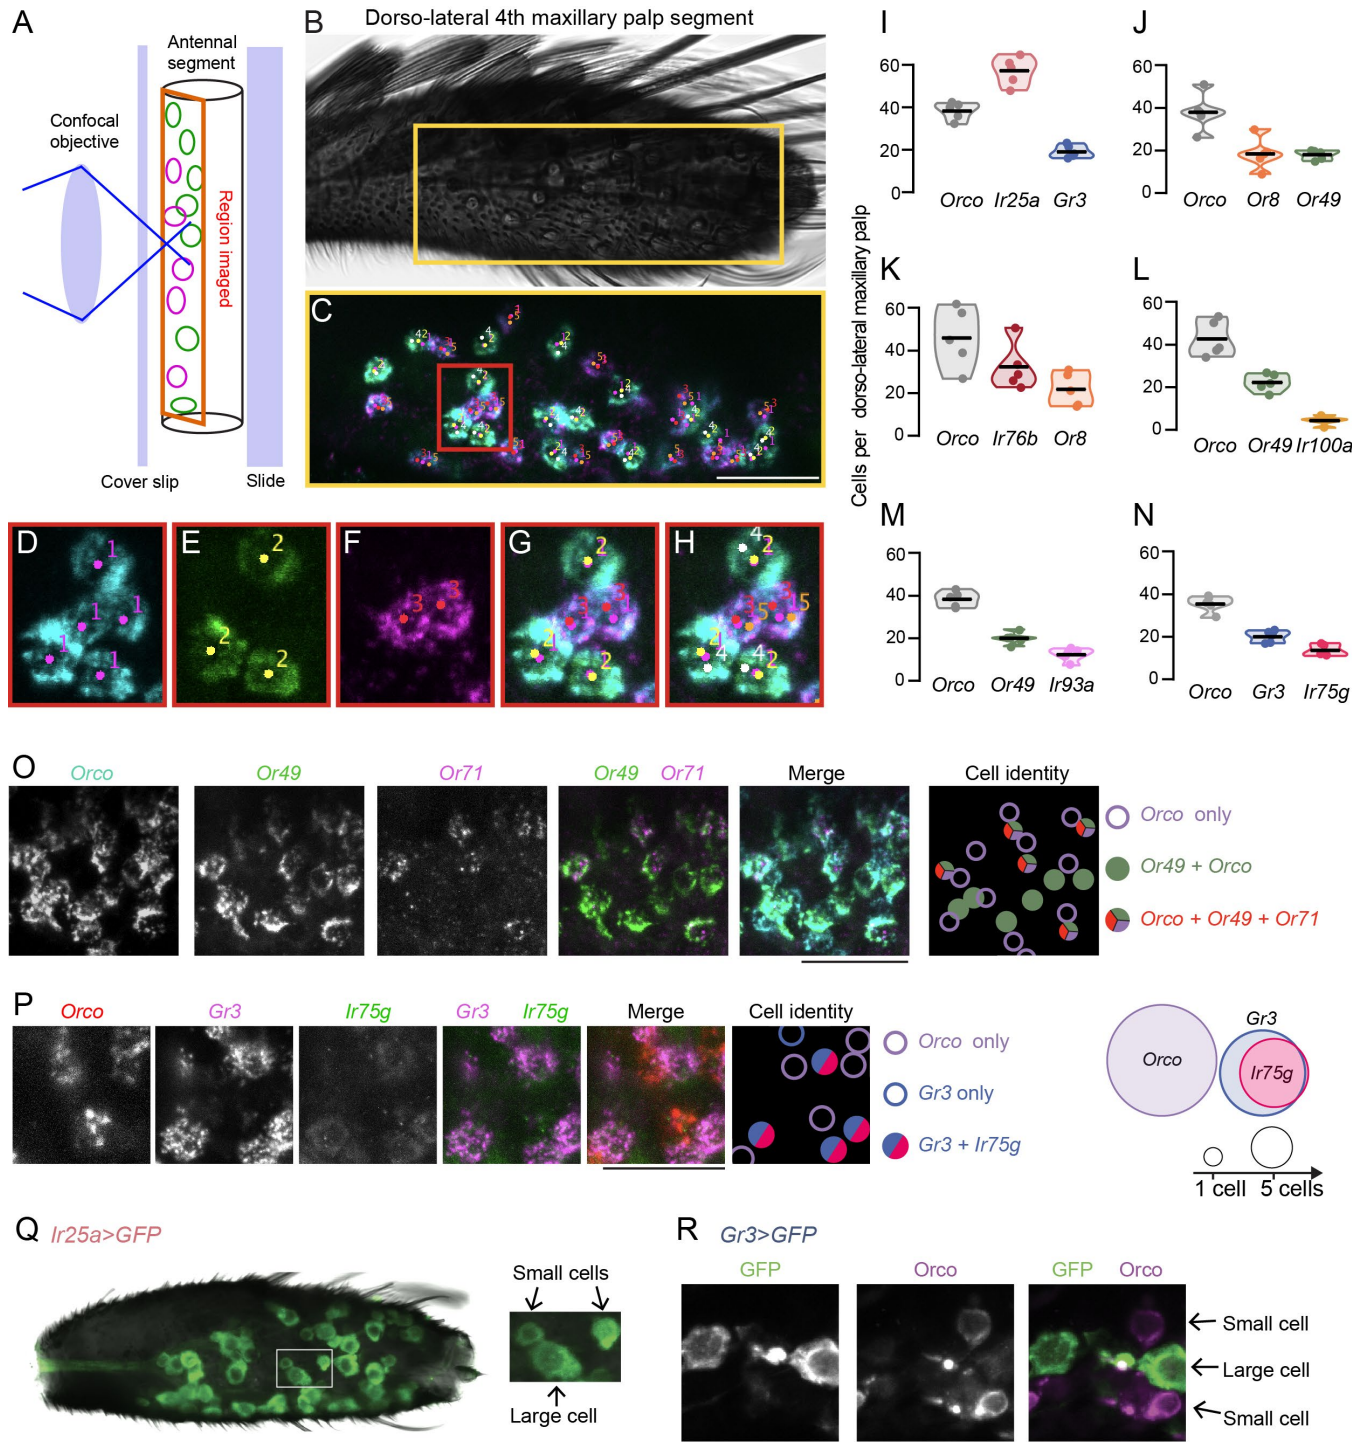

2323  
2324  
2325  
2326  
2327  
2328  
2329

### Figure S12. Quantification of maxillary palp cell populations (Related to Figure 6)

(A-H) Workflow for cell quantification. Schematic of antennal region imaged on a confocal microscope (A) and image of maxillary palp with imaged area indicated with the yellow square (B). Whole-mount maxillary palp RNA *in situ* hybridization, yellow region from (C). Cells are manually marked independently as *Orco*<sup>+</sup>, *Or49*<sup>+</sup>, or *Or8*<sup>+</sup> (red inset from B) using FIJI Cell Counter (D-F) and markers from each channel are merged (G). Cells with markers 1 and 2 are

2330 then scored as *Orco+Or49+* with marker 4, and cells with markers 1 and 3 are then scored as  
2331 *Orco+Or8+* with marker 5 (H). Counts from each marker for each image are exported into  
2332 Excel and R for further analysis. **(I-N)** Total cell counts from whole mount maxillary palp RNA  
2333 *in situ* hybridization in **Figure 6**. Mean with range, n=5. **(O-P)** RNA *in situ* hybridization of  
2334 whole-mount maxillary palp with the indicated probe and cell identity schematic. **(Q-R)** Whole-  
2335 mount maxillary palp immunostaining showing *Ir25a* expression in “small” and “large” cells (Q)  
2336 and *Gr3* expression in “large” cells and Orco protein in “small” cells (R). Scale bars: 25  $\mu$ m  
2337 except (C): 50  $\mu$ m. Orientation (B, P): proximal left.

2338  
2339

## Figure S13

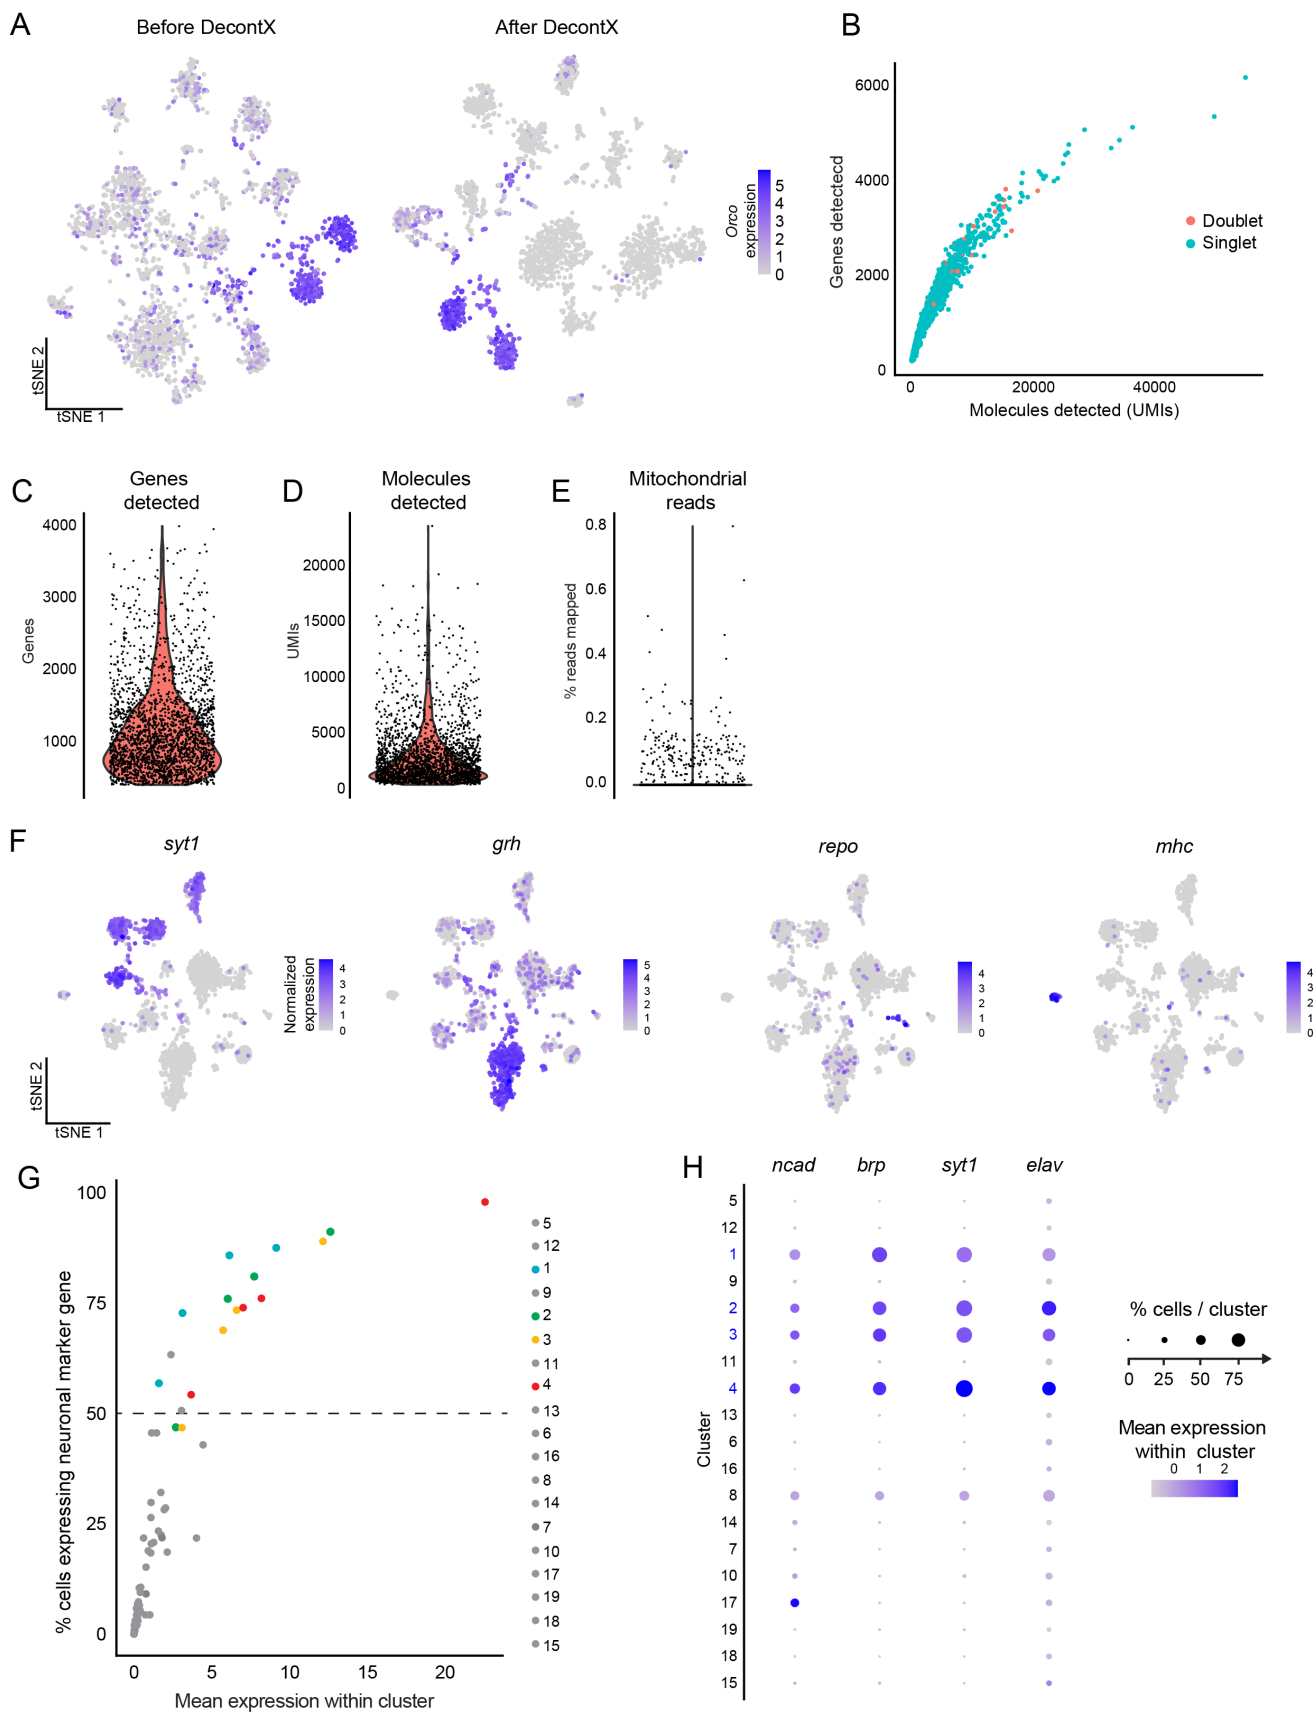

2341 **Figure S13: Maxillary palp snRNA-seq ambient RNA removal, filtering, and neuron-**  
2342 **identification (Related to Figure 7)**  
2343 (A) Ambient RNA removal using DecontX, illustrated using normalized expression of *Orco*  
2344 mapped onto t-distributed stochastic neighbor embedding (t-SNE) plots for maxillary palp  
2345 snRNA-seq experiment. Normalized Expression:  $\log(\text{UMI of gene} \times 10,000 / \text{total UMI of cell}$   
2346  $+ 1)$ . (B) Identification of multiplets for removal using DoubletFinder. Pearson Correlation  
2347 coefficient of genes and counts was 0.93. (C-E) Sample properties and distributions after  
2348 filtering. Nuclei were retained that expressed between 400 and 40000 genes (C) and fewer  
2349 than 5% mitochondrial transcripts (E). Nuclei were not additionally filtered on UMIs after  
2350 multiplet removal (D). (F) Normalized expression [ $\log(\text{UMI of gene} \times 10,000 / \text{total UMI of cell}$   
2351  $+ 1)$ ] mapped onto t-SNE plots for *syt1* as a marker for neurons, *grh* for epithelial cells, *repo* for  
2352 glial cells, and *mhc* for muscle cells. (G) Distribution of neural marker genes (*ncad*, *brp*, *syt1*,  
2353 and *elav*) within clusters. Points denote expression patterns of individual neural marker genes  
2354 for each cluster. Line indicates the threshold used to identify neuron clusters, with 50% of cells  
2355 within a cluster expressing a 3 out of 4 defined neural markers. Mean expression in cluster:  
2356  $\text{UMI of gene} \times 10,000 / \text{total UMI of cell} + 1$ . (H) Dot plot of neural markers used to identify  
2357 neuron clusters. Clusters of identified neurons are identified as clusters 1, 2, 3, and 4. Mean  
2358 scaled expression in cluster: Z-score.

2359  
2360

## Figure S14

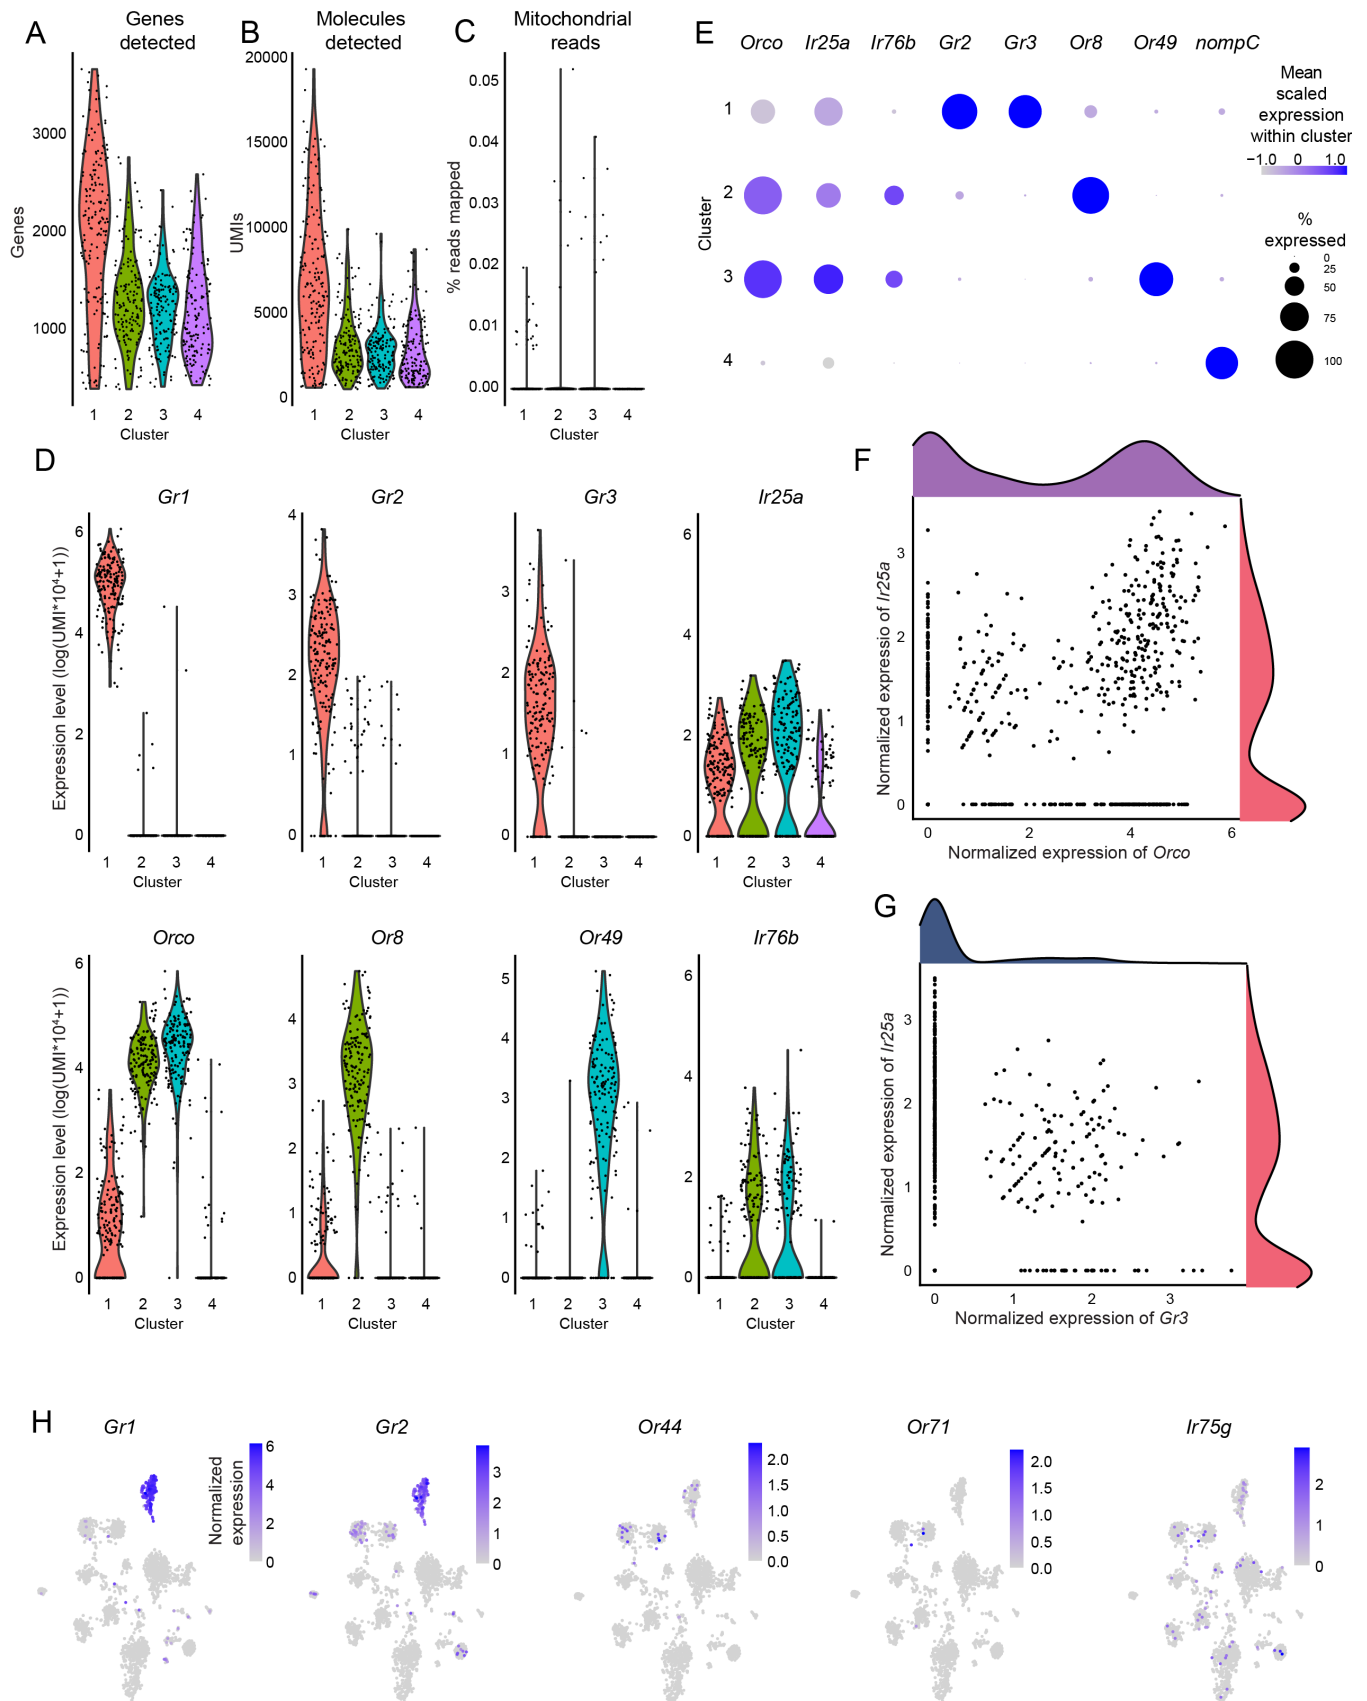

2362 **Figure S14: Maxillary palp snRNA-seq cluster chemosensory receptor expression**  
2363 **analysis and co-receptor analysis on four identified neuron cluster populations (Related**  
2364 **to Figure 7)**  
2365 (A) Number of genes detected per cell in neuron clusters defined in **Figure S13G-H**. (B)  
2366 Number of transcripts detected per cell in neuron clusters. (C) Percent mitochondrial reads per  
2367 cell in neuron clusters. (D) Distribution of normalized expression levels of the indicated genes  
2368 in cells within neuronal clusters. Normalized Expression:  $\log(\text{UMI of gene} \times 10,000 / \text{total UMI of}$   
2369  $\text{cell} + 1)$ . (E) Dot plot illustrating mean scaled expression (Z-score) and cells expressing a given  
2370 gene. (F-G) Scatter plot depicting expression levels within individual neuron-identified cells of  
2371 *Orco* and *Ir25a* (F) and *Gr3* and *Ir25a* (G). Normalized Expression:  $\log(\text{UMI of gene} \times 10,000 /$   
2372  $\text{total UMI of cell} + 1)$ . (H) Feature plots showing normalized expression mapped onto t-SNE  
2373 plots for the indicated genes. Normalized Expression:  $\log(\text{UMI of gene} \times 10,000 / \text{total UMI of}$   
2374  $\text{cell} + 1)$ .
